# Supplementary material for: Transition-metal-free highly regioselective C–H acetoxylation of pyrrolo[2,3-d]pyrimidine derivatives
Source: Royal Society of Chemistry journal article supplement (doi:10.1039/d0qo00702a), 2020-01-01

Supporting Information

**Transition-metal-free highly regioselective C-H acetoxylation of  
pyrrolo[2,3-*d*]pyrimidine derivatives**

Zhengtong Mao, Min Liu, Gaouyang Zhu, Jing Zhou, Xingxian Zhang\*

College of Pharmaceutical Science, Zhejiang University of Technology, Hangzhou  
310014, P. R. China

**Table of Contents**

|                                                                         |      |
|-------------------------------------------------------------------------|------|
| 1. General Information.....                                             | S2   |
| 2. General Procedures of synthesizing the products.....                 | S3   |
| 3. Characterization of the products.....                                | S6   |
| 4. <sup>1</sup> H NMR, <sup>13</sup> C NMR and HRMS Spectra.....        | S31  |
| 5. Single Crystal X-ray Diffraction Data for Compounds <b>2ba</b> ..... | S102 |

## 1. General Information

All reagents were obtained from commercial suppliers and used without further purification. A series of substrates **1** were prepared according to the literature procedure.<sup>1</sup> 4-Chloro-7-methyl-7H-pyrrolo[2,3-d]pyrimidine **4a** is commercially available from Aladdin. 4-Methoxy-7-methyl-7H-pyrrolo[2,3-d] pyrimidine **4b** was prepared according to the literature.<sup>2</sup> *N,N*-Diethyl-7-methyl-7H-pyrrolo[2,3-d] pyrimidin-4-amine **4c** was prepared according to the method provided by Flanagan.<sup>3</sup> Yields for all products were determined by the silica gel (200-300 mesh) column chromatography (eluent: petroleum ether 40-60/EtOAc), and the reactions were monitored by thin layer chromatography (TLC) on a glass plate coated with silica gel with fluorescent indicator (GF254) using UV light. The <sup>1</sup>H and <sup>13</sup>C nuclear magnetic resonance (NMR) spectra were recorded on a Bruker ADNANCE III 500 MHz using CDCl<sub>3</sub> as solvent with TMS as internal standard. Chemical shifts are given in ppm (δ) referenced to CDCl<sub>3</sub> with 7.26 for <sup>1</sup>H and 77.16 for <sup>13</sup>C, and to DMSO-d<sub>6</sub> with 2.50 for <sup>1</sup>H and 39.52 for <sup>13</sup>C. Signals are abbreviated as follows: s, singlet; d, doublet; t, triplet; q, quartet; m, multiplet, and coupling constants are expressed in hertz. Melting points were measured on a BUCHI B-540 and uncorrected. HRMS (ESI) was recorded using Agilent 6520 accurate-Mass Q-TOF LC/MS system (1200-6520/Agilent).

## 2. General Procedures for the acetoxylation

### (1) General Procedures for NaI-promoted acyloxylation

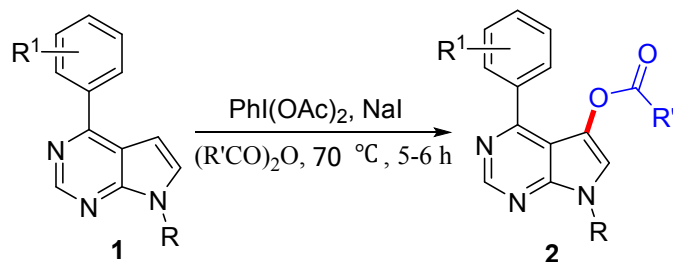

The reaction of 7-methyl-4-phenyl-7*H*-pyrrolo[2,3-*d*]pyrimidin-5-yl acetate **2aa** was exemplified here. Diacetoxyiodobenzene (193 mg, 0.6 mmol),  $\text{Ac}_2\text{O}$  (1mL), sodium iodide (60 mg, 0.4 mmol) and 7-methyl-4-phenyl-7*H*-pyrrolo [2,3-*d*]pyrimidine **1aa** (42 mg, 0.2 mmol) were added in a pressure vessel. The reaction mixture was stirred at  $70\text{ }^\circ\text{C}$  for 6 h. After completion of the reaction, it was then cooled to room temperature, extracted with EA ( $3\times 20\text{ mL}$ ) and washed with water (20 mL), saturated sodium bicarbonate (20 mL) and brine (20 mL) before the organic phase was dried over anhydrous  $\text{Na}_2\text{SO}_4$  and concentrated in vacuo. The residue was purified by column chromatography (PE/EtOAc v/v 2:1) on silica gel to provide the desired product 7-methyl-4-phenyl-7*H*-pyrrolo[2,3-*d*]pyrimidin-5-yl acetate **2aa** (47.6 mg, 89% yield).

### (2) General Procedures for the acetoxylation without NaI as an additive

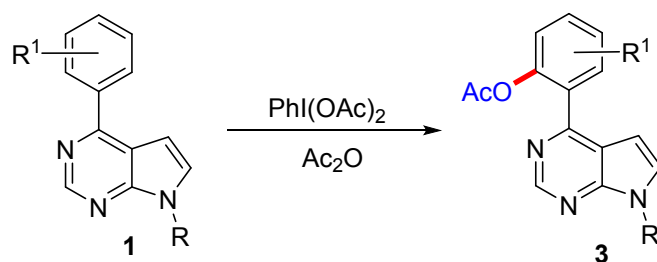

The reaction of 2-(7-methyl-7*H*-pyrrolo[2,3-*d*]pyrimidin-4-yl)phenyl acetate **3aa** was exemplified here. Diacetoxyiodobenzene (193 mg, 0.6 mmol),  $\text{Ac}_2\text{O}$  (1 mL) and 7-methyl-4-phenyl-7*H*-pyrrolo[2,3-*d*]pyrimidine **1aa** (42 mg, 0.2 mmol) were added in a pressure vessel. The reaction mixture was stirred at  $70\text{ }^\circ\text{C}$  for 12 h. After completion of the reaction, it was then cooled to room temperature, extracted with EA ( $3\times 20\text{ mL}$ ) and washed with water (20 mL), saturated sodium bicarbonate (20 mL) and brine (20 mL) before the organic phase was dried over anhydrous  $\text{Na}_2\text{SO}_4$  and concentrated in

vacuo. The residue was purified by column chromatography (PE/EtOAc v/v 2:1) on silica gel to provide the desired product 2-(7-methyl-7H-pyrrolo[2,3-d]pyrimidin-4-yl) phenyl acetate **3aa** (35.8 mg, 69% yield).

### (3) Synthesis of acetoxyated compound **7**

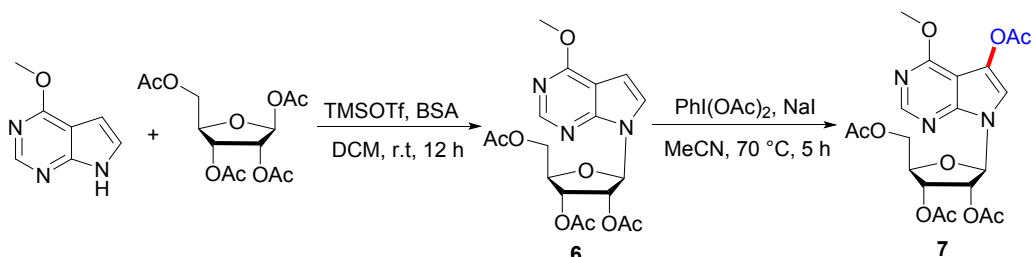

4-Methoxy-7H-pyrrolo[2,3-d]pyrimidine **4b** (164 mg, 1.1 mmol), 1,2,3,5-tetra-*O*-acetyl-D-ribose (318 mg, 1.0 mmol), *N,O*-bis(trimethylsilyl) acetamide (0.05 mL), TMSOTf (0.05 mL) and DCM (10 mL) were added in a round-bottomed flask. The reaction mixture was stirred at room temperature for 12 h. After completion of the reaction, extracted with EA (3×20 mL) and washed with water (20 mL), saturated sodium bicarbonate (20 mL) and brine (20 mL) before the organic phase was dried over anhydrous Na<sub>2</sub>SO<sub>4</sub> and concentrated in vacuo. The residue was purified by column chromatography (PE/EtOAc V/V 4:1) on silica gel to provide the desired product 2-(acetoxymethyl)-5-(4-methoxy-7H-pyrrolo[2,3-d] pyrimidin-7-yl) tetrahydrofuran-3,4-diyl diacetate **6** (257 mg, 64% yield).

Diacetoxiodobenzene (193 mg, 0.6 mmol), MeCN (1.0 mL) and **6** (86 mg, 0.2 mmol) were added in a pressure vessel. The reaction mixture was stirred at 70 °C for 5 h. After completion of the reaction, it was then cooled to room temperature, extracted with EA (3×20 mL) and washed with water (20 mL), saturated sodium bicarbonate (20 mL) and brine (20 mL) before the organic phase was dried over anhydrous Na<sub>2</sub>SO<sub>4</sub> and concentrated in vacuo. The residue was purified by column chromatography (PE/EtOAc v/v 4:1) on silica gel to provide the desired product 2-(5-acetoxy-4-methoxy-7H-pyrrolo[2,3-d] pyrimidin-7-yl)-5-(acetoxymethyl) tetrahydrofuran-3,4-diyl diacetate **7** (59 mg, 63% yield).

### Reference:

1. M. Klečka, R. Pohl, B. Klepetářov and M. Hocek, *Org Biomol Chem*, 2009, **7**,

866–868.

2. A. Thiyagarajan, M. Toyama, M. Baba, A. Sharon and C. Bal, *Nucleosides Nucleotides Nucleic Acids*, 2016, **35**, 305-314.
3. M. E. Flanagan, T. A. Blumenkopf, W. H. Brissette, M. F. Brown, J. M. Casavant, C. Shang-Poa, J. L. Doty, *J Med Chem*, 2010, **53**, 8468-8484.

#### **4. Characterization of the products**

**7-methyl-4-phenyl-7H-pyrrolo[2,3-d]pyrimidin-5-yl acetate (2aa)**

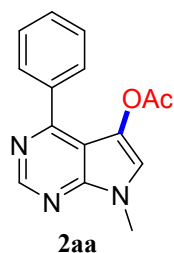

Yellow solid (89% yield) Mp: 128–131 °C. <sup>1</sup>H NMR (500 MHz, CDCl<sub>3</sub>) δ 8.98 (s, 1H), 7.89–7.82 (m, 2H), 7.52 (dd, *J* = 5.2, 2.0 Hz, 3H), 7.26 (s, 1H), 3.92 (s, 3H), 2.03 (s, 3H). <sup>13</sup>C NMR (126 MHz, CDCl<sub>3</sub>) δ 168.70, 158.54, 151.74, 148.28, 139.88, 134.88, 129.41, 128.82, 126.93, 119.15, 108.47, 31.07, 20.65. HRMS-ESI calculated for C<sub>15</sub>H<sub>13</sub>N<sub>3</sub>O<sub>2</sub> [M+H]<sup>+</sup> 268.1086, found 268.1082.

#### 4-phenyl-7-propyl-7H-pyrrolo[2,3-d]pyrimidin-5-yl acetate (2ab)

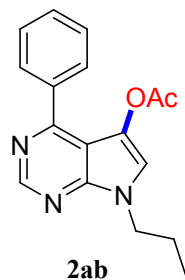

Yellow viscous oil (84% yield). <sup>1</sup>H NMR (500 MHz, CDCl<sub>3</sub>) δ 8.95 (s, 1H), 7.87–7.82 (m, 2H), 7.50 (p, *J* = 3.0, 2.4 Hz, 3H), 7.30 (s, 1H), 4.27 (t, *J* = 7.2 Hz, 2H), 2.02 (s, 3H), 1.92 (dt, *J* = 14.7, 7.4 Hz, 2H), 0.98 (t, *J* = 7.4 Hz, 3H). <sup>13</sup>C NMR (126 MHz, CDCl<sub>3</sub>) δ 168.56, 158.45, 151.59, 147.98, 137.71, 129.62, 129.41, 128.05, 126.89, 118.26, 108.59, 46.18, 23.47, 20.54, 11.27. HRMS-ESI calculated for C<sub>17</sub>H<sub>17</sub>N<sub>3</sub>O<sub>2</sub> [M+H]<sup>+</sup> 296.1394, found 296.1394.

#### 7-benzyl-4-phenyl-7H-pyrrolo[2,3-d]pyrimidin-5-yl acetate (2ac)

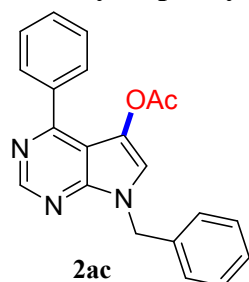

White solid (92% yield). Mp: 97–100 °C. <sup>1</sup>H NMR (500 MHz, CDCl<sub>3</sub>) δ 9.00 (s, 1H), 7.88–7.85 (m, 2H), 7.54–7.50 (m, 3H), 7.38–7.32 (m, 2H), 7.32–7.27 (m, 3H), 7.25 (s,

1H), 5.50 (s, 2H), 2.00 (s, 3H). <sup>13</sup>C NMR (101 MHz, CDCl<sub>3</sub>) δ 168.46, 158.64, 151.94, 148.30, 137.64, 136.35, 129.69, 129.42, 128.91, 128.11, 128.08, 127.79, 127.40, 118.09, 108.68, 47.87, 20.51. HRMS-ESI calculated for C<sub>21</sub>H<sub>17</sub>N<sub>3</sub>O<sub>2</sub> [M+H]<sup>+</sup> 344.1394, found 344.1394.

**4-phenyl-7-((2-(trimethylsilyl)ethoxy)methyl)-7H-pyrrolo[2,3-d]pyrimidin-5-yl acetate (2ad)**

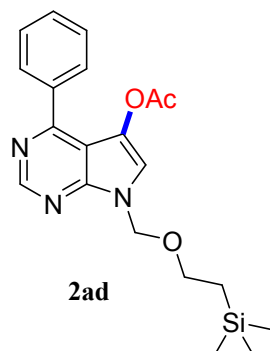

White solid (87% yield). Mp: 63–66 °C. <sup>1</sup>H NMR (500 MHz, CDCl<sub>3</sub>) δ 8.98 (s, 1H), 7.88–7.82 (m, 2H), 7.52 (dd, *J* = 5.1, 2.0 Hz, 3H), 7.43 (s, 1H), 5.70 (s, 2H), 3.64–3.58 (m, 2H), 2.02 (s, 3H), 1.00 – 0.90 (m, 2H), -0.02 (s, 9H). <sup>13</sup>C NMR (151 MHz, CDCl<sub>3</sub>) δ 168.35, 158.77, 152.13, 149.06, 137.51, 129.77, 129.44, 128.11, 128.03, 117.93, 108.90, 72.80, 66.73, 20.53, 17.75, -1.45. HRMS-ESI calculated for C<sub>20</sub>H<sub>25</sub>N<sub>3</sub>O<sub>3</sub>Si [M+H]<sup>+</sup> 384.1738, found 384.1737.

**4-phenyl-7H-pyrrolo[2,3-d]pyrimidin-5-yl acetate (2ae)**

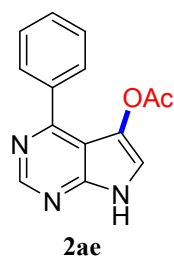

White solid (84% yield). Mp: 99–101 °C. <sup>1</sup>H NMR (500 MHz, CDCl<sub>3</sub>) δ 9.04 (s, 1H), 8.21 (s, 1H), 7.67 (dd, *J* = 7.7, 1.8 Hz, 2H), 7.58 – 7.54 (m, 3H), 7.53 (s, 1H), 3.08 (s, 3H). <sup>13</sup>C NMR (126 MHz, CDCl<sub>3</sub>) δ 167.41, 152.74, 152.36, 151.42, 132.35, 130.88, 130.00, 128.85, 127.88, 118.91, 104.92, 26.01. C<sub>14</sub>H<sub>11</sub>N<sub>3</sub>O<sub>2</sub> [M+Na]<sup>+</sup> 276.0743, found 276.0643.

**7-methyl-4-(p-tolyl)-7H-pyrrolo[2,3-d]pyrimidin-5-yl acetate (2ba)**

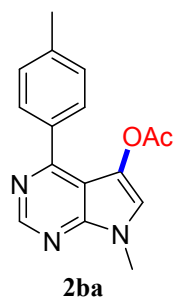

Yellow solid (78% yield). Mp: 155-157 °C. <sup>1</sup>H NMR (500 MHz, CDCl<sub>3</sub>) δ 8.95 (s, 1H), 7.80 – 7.73 (m, 2H), 7.32 (d, *J* = 7.9 Hz, 2H), 7.25 (s, 1H), 3.90 (s, 3H), 2.45 (s, 3H), 2.06 (s, 3H). <sup>13</sup>C NMR (126 MHz, CDCl<sub>3</sub>) δ 168.70, 158.54, 151.74, 148.28, 139.88, 134.88, 129.41, 128.82, 126.93, 119.15, 108.47, 31.07, 21.44, 20.65. HRMS-ESI calculated for C<sub>16</sub>H<sub>15</sub>N<sub>3</sub>O<sub>2</sub> [M+H]<sup>+</sup> 282.1242, found 282.1243.

**4-(4-(tert-butyl)phenyl)-7-methyl-7H-pyrrolo[2,3-d]pyrimidin-5-yl acetate (2bb)**

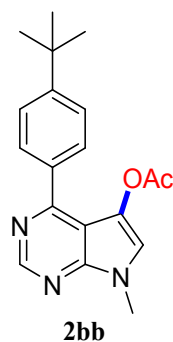

Yellow solid (84% yield). Mp: 110–112 °C. <sup>1</sup>H NMR (600 MHz, CDCl<sub>3</sub>) δ 8.85 (s, 1H), 7.69 (d, *J* = 8.2 Hz, 2H), 7.44 (d, *J* = 8.2 Hz, 2H), 7.14 (s, 1H), 3.80 (s, 3H), 1.92 (s, 3H), 1.29 (s, 9H). <sup>13</sup>C NMR (151 MHz, CDCl<sub>3</sub>) δ 168.75, 158.53, 153.07, 151.64, 148.25, 134.58, 129.18, 127.00, 125.12, 119.31, 108.62, 34.81, 31.29, 31.12, 20.52. HRMS-ESI calculated for C<sub>19</sub>H<sub>21</sub>N<sub>3</sub>O<sub>2</sub> [M+H]<sup>+</sup> 324.1707, found 324.1717.

**4-(4-methoxyphenyl)-7-methyl-7H-pyrrolo[2,3-d]pyrimidin-5-yl acetate (2bc)**



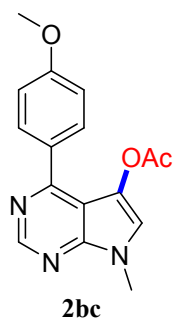

Yellow solid (92% yield). Mp: 138–141 °C. <sup>1</sup>H NMR (500 MHz, CDCl<sub>3</sub>) δ 8.93 (s, 1H), 7.90 – 7.83 (m, 2H), 7.25 (s, 1H), 7.08 – 6.99 (m, 2H), 3.90 (s, 6H), 2.10 (s, 3H). <sup>13</sup>C NMR (126 MHz, CDCl<sub>3</sub>) δ 168.70, 161.12, 158.14, 151.74, 148.29, 131.07, 130.25, 126.96, 119.03, 113.60, 108.24, 55.42, 31.11, 20.74. HRMS-ESI calculated for C<sub>16</sub>H<sub>15</sub>N<sub>3</sub>O<sub>3</sub> [M+H]<sup>+</sup> 298.1191, found 298.1192.

**4-(4-cyanophenyl)-7-methyl-7H-pyrrolo[2,3-d]pyrimidin-5-yl acetate (2bd)**

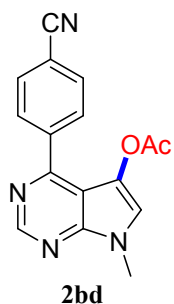

Yellow solid (68% yield). Mp: 182–185 °C. <sup>1</sup>H NMR (500 MHz, CDCl<sub>3</sub>) δ 9.00 (s, 1H), 8.02 – 7.99 (m, 2H), 7.84 – 7.81 (m, 2H), 7.38 (s, 1H), 3.94 (s, 3H), 2.08 (s, 3H). <sup>13</sup>C NMR (126 MHz, CDCl<sub>3</sub>) δ 168.26, 163.57, 155.95, 151.78, 142.10, 132.33, 131.81, 130.40, 130.25, 126.56, 120.14, 113.34, 31.23, 20.64. HRMS-ESI calculated for C<sub>16</sub>H<sub>12</sub>N<sub>4</sub>O<sub>2</sub> [M+H]<sup>+</sup> 293.1038, found 293.1035.

**7-methyl-4-(4-(trifluoromethyl)phenyl)-7H-pyrrolo[2,3-d]pyrimidin-5-yl acetate (2be)**

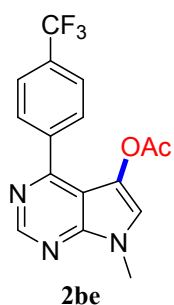

Yellow solid (77% yield). Mp:123-126 °C. <sup>1</sup>H NMR (400 MHz, CDCl<sub>3</sub>) δ 8.95 (s, 1H), 7.95 (d, *J* = 8.0 Hz, 2H), 7.75 (d, *J* = 8.1 Hz, 2H), 7.30 (s, 1H), 3.88 (s, 3H), 2.00 (s, 3H). <sup>13</sup>C NMR (101 MHz, CDCl<sub>3</sub>) δ 168.38, 156.57, 151.69, 148.26, 141.13, 131.49 (*J*<sub>C-F</sub> = 64.64Hz), 129.88, 126.60, 124.94 (*J*<sub>C-F</sub> = 4.04Hz), 124.04 (*J*<sub>C-F</sub> = 272.7Hz), 119.88, 108.63, 31.08, 20.45. HRMS-ESI calculated for C<sub>16</sub>H<sub>12</sub>F<sub>3</sub>N<sub>3</sub>O<sub>2</sub> [M+H]<sup>+</sup> 36.0960, found 36.0950.

#### 4-(4-fluorophenyl)-7-methyl-7H-pyrrolo[2,3-d]pyrimidin-5-yl acetate (2bf)

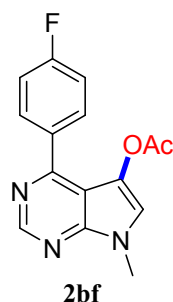

Yellow solid (79% yield). Mp:126-129 °C. <sup>1</sup>H NMR (500 MHz, CDCl<sub>3</sub>) δ 8.95 (s, 1H), 7.88 (dd, *J* = 8.8, 5.4 Hz, 2H), 7.29 (s, 1H), 7.21 (t, *J* = 8.7 Hz, 2H), 3.91 (s, 3H), 2.08 (s, 3H). <sup>13</sup>C NMR (126 MHz, CDCl<sub>3</sub>) δ 168.53, 164.91, 162.93, 157.28, 151.75, 148.29, 131.52 (*J*<sub>C-F</sub> = 8.82Hz), 126.80, 119.43, 115.19 (*J*<sub>C-F</sub> = 21.4Hz), 108.44, 31.14, 20.64. HRMS-ESI calculated for C<sub>15</sub>H<sub>12</sub>FN<sub>3</sub>O<sub>2</sub> [M+H]<sup>+</sup> 286.0992, found 286.0983.

#### 4-(4-chlorophenyl)-7-methyl-7H-pyrrolo[2,3-d]pyrimidin-5-yl acetate (2bg)

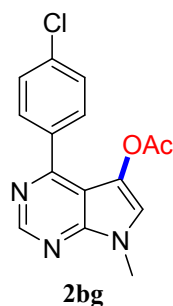

Yellow solid (93% yield). Mp:162-165 °C. <sup>1</sup>H NMR (500 MHz, CDCl<sub>3</sub>) δ 8.96 (s, 1H), 7.87 – 7.79 (m, 2H), 7.52 – 7.48 (m, 2H), 7.31 (s, 1H), 3.91 (s, 3H), 2.09 (s, 3H). <sup>13</sup>C NMR (126 MHz, CDCl<sub>3</sub>) δ 168.52, 157.07, 151.75, 148.31, 136.18, 136.06, 130.87, 128.35, 126.74, 119.56, 108.46, 31.15, 20.68. HRMS-ESI calculated for C<sub>15</sub>H<sub>12</sub>ClN<sub>3</sub>O<sub>2</sub> [M+H]<sup>+</sup> 302.0691, found 302.0680.

**4-(3-methoxyphenyl)-7-methyl-7H-pyrrolo[2,3-d]pyrimidin-5-yl acetate (2ca)**

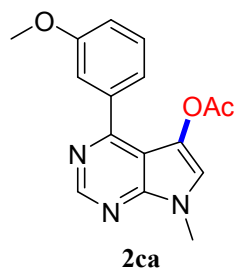

White solid (92% yield). Mp: 156–159 °C. <sup>1</sup>H NMR (400 MHz, CDCl<sub>3</sub>) δ 8.96 (s, 1H), 7.45 – 7.39 (m, 3H), 7.24 (s, 1H), 7.07 – 7.03 (m, 1H), 3.90 (s, 6H), 2.05 (s, 3H). <sup>13</sup>C NMR (101 MHz, CDCl<sub>3</sub>) δ 168.87, 159.43, 158.29, 151.69, 148.36, 138.92, 129.15, 126.83, 121.91, 119.52, 115.72, 114.57, 108.66, 55.39, 31.13, 20.49. HRMS-ESI calculated for C<sub>16</sub>H<sub>15</sub>N<sub>3</sub>O<sub>3</sub> [M+H]<sup>+</sup> 298.1186, found 298.1181.

**7-methyl-4-(m-tolyl)-7H-pyrrolo[2,3-d]pyrimidin-5-yl acetate (2cb)**

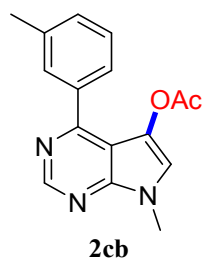

Yellow solid (90% yield). Mp: 99–102 °C. <sup>1</sup>H NMR (600 MHz, CDCl<sub>3</sub>) δ 8.88 (s, 1H), 7.59 (d, *J* = 2.1 Hz, 1H), 7.55 (d, *J* = 7.7 Hz, 1H), 7.31 (t, *J* = 7.6 Hz, 1H), 7.23 (d, *J* = 7.5 Hz, 1H), 7.16 (s, 1H), 3.83 – 3.81 (m, 3H), 2.38 (s, 3H), 1.95 (s, 3H). <sup>13</sup>C NMR (151 MHz, CDCl<sub>3</sub>) δ 168.73, 158.69, 151.76, 148.30, 137.80, 137.59, 130.52, 130.01, 127.97, 126.92, 126.64, 119.28, 108.61, 31.11, 21.46, 20.50. HRMS-ESI calculated for C<sub>16</sub>H<sub>15</sub>N<sub>3</sub>O<sub>2</sub> [M+H]<sup>+</sup> 282.1237, found 282.1241.

**7-methyl-4-(3-(trifluoromethyl)phenyl)-7H-pyrrolo[2,3-d]pyrimidin-5-yl acetate (2cc)**

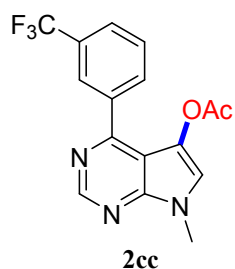

Yellow solid (77% yield). Mp:123-125 °C. <sup>1</sup>H NMR (500 MHz, CDCl<sub>3</sub>) δ 8.98 (s, 1H), 8.18 – 8.10 (m, 2H), 7.78 (d, *J* = 7.8 Hz, 1H), 7.67 (t, *J* = 7.8 Hz, 1H), 7.39 (s, 1H), 3.92 (s, 3H), 2.06 (s, 3H). <sup>13</sup>C NMR (126 MHz, CDCl<sub>3</sub>) δ 168.43, 156.55, 151.74, 148.23, 138.48, 132.84, 130.45 (*J*<sub>C-F</sub> = 32.76Hz), 128.84, 126.72, 126.56 (*J*<sub>C-F</sub> = 7.53Hz), 126.40(*J*<sub>C-F</sub> = 7.56Hz), 124.08(*J*<sub>C-F</sub> = 136.71Hz), 119.77, 108.42, 31.17, 20.39. HRMS-ESI calculated for C<sub>16</sub>H<sub>12</sub>F<sub>3</sub>N<sub>3</sub>O<sub>2</sub> [M+H]<sup>+</sup> 336.0960, found 336.0947.

#### 4-(3-cyanophenyl)-7-methyl-7H-pyrrolo[2,3-*d*]pyrimidin-5-yl acetate (2cd)

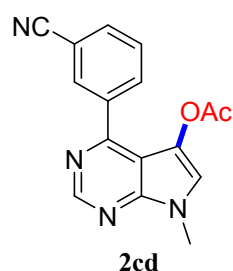

Yellow solid (85% yield). Mp:120-122 °C. <sup>1</sup>H NMR (500 MHz, CDCl<sub>3</sub>) δ 8.99 (s, 1H), 8.23 (t, *J* = 1.4 Hz, 1H), 8.21 – 8.17 (m, 1H), 7.82 – 7.80 (m, 1H), 7.66 (t, *J* = 7.8 Hz, 1H), 7.42 (s, 1H), 3.94 (s, 3H), 2.15 (s, 3H). <sup>13</sup>C NMR (126 MHz, CDCl<sub>3</sub>) δ 168.19, 163.54, 155.50, 151.74, 138.89, 133.93, 133.83, 133.44, 133.34, 132.98, 129.14, 126.52, 120.04, 112.31, 31.22, 20.63. HRMS-ESI calculated for C<sub>16</sub>H<sub>12</sub>N<sub>4</sub>O<sub>2</sub> [M+H]<sup>+</sup> 293.1038, found 293.1036.

#### 4-(3-chlorophenyl)-7-methyl-7H-pyrrolo[2,3-*d*]pyrimidin-5-yl acetate (2ce)

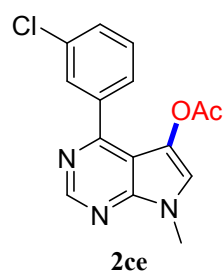

White solid (89% yield). Mp: 117–119 °C. <sup>1</sup>H NMR (500 MHz, CDCl<sub>3</sub>) δ 8.95 (s, 1H), 7.87 (d, *J* = 1.9 Hz, 1H), 7.80 (dt, *J* = 7.0, 1.7 Hz, 1H), 7.50 – 7.43 (m, 2H), 7.32 (s, 1H), 3.90 (s, 3H), 2.12 (s, 3H). <sup>13</sup>C NMR (126 MHz, CDCl<sub>3</sub>) δ 168.49, 156.64, 151.67, 148.26, 139.37, 133.87, 129.71, 129.53, 127.62, 126.66, 119.65, 108.41, 31.11, 20.52 (one sp<sup>2</sup> signal were not observed because of overlapping). HRMS-ESI calculated for C<sub>15</sub>H<sub>12</sub>ClN<sub>3</sub>O<sub>2</sub> [M+H]<sup>+</sup> 302.0691, found 302.0689.

**7-methyl-4-(*o*-tolyl)-7*H*-pyrrolo[2,3-*d*]pyrimidin-5-yl acetate (2da)**

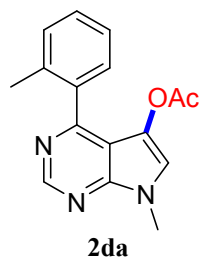

Yellow viscous oil (82% yield). <sup>1</sup>H NMR (500 MHz, CDCl<sub>3</sub>) δ 8.97 (s, 1H), 7.32–7.30 (m, 1H), 7.30–7.28 (m, 3H), 7.14 (s, 1H), 3.91 (s, 3H), 2.24 (s, 3H), 1.72 (s, 3H). <sup>13</sup>C NMR (126 MHz, CDCl<sub>3</sub>) δ 169.02, 159.31, 151.77, 148.00, 136.82, 136.47, 130.27, 129.36, 128.89, 127.15, 125.26, 119.24, 110.15, 31.03, 19.79, 19.57. HRMS-ESI calculated for C<sub>16</sub>H<sub>15</sub>N<sub>3</sub>O<sub>2</sub> [M+H]<sup>+</sup> 282.1242, found 282.1032.

**4-(2-methoxyphenyl)-7-methyl-7*H*-pyrrolo[2,3-*d*]pyrimidin-5-yl acetate (2db)**

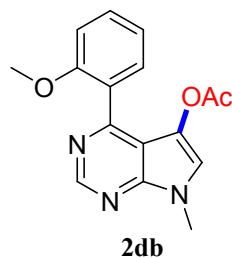

Yellow viscous oil (85% yield). <sup>1</sup>H NMR (500 MHz, CDCl<sub>3</sub>) δ 8.98 (s, 1H), 7.49–7.41 (m, 2H), 7.16 (s, 1H), 7.09 (td, *J* = 7.5, 1.0 Hz, 1H), 7.02 (dd, *J* = 8.2, 1.0 Hz, 1H), 3.89 (s, 3H), 3.76 (s, 3H), 1.84 (s, 3H). <sup>13</sup>C NMR (126 MHz, CDCl<sub>3</sub>) δ 168.76, 157.14, 156.28, 151.91, 147.61, 130.79, 130.63, 127.35, 127.00, 120.56, 119.13, 110.79, 110.65, 55.60, 31.00, 20.09. HRMS-ESI calculated for C<sub>16</sub>H<sub>15</sub>N<sub>3</sub>O<sub>3</sub> [M+H]<sup>+</sup> 298.1191, found 298.1189.

**4-(2-chlorophenyl)-7-methyl-7*H*-pyrrolo[2,3-*d*]pyrimidin-5-yl acetate (2dc)**

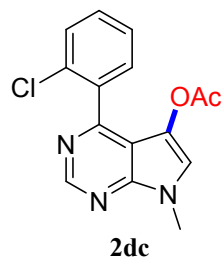

Yellow viscous oil (73% yield). <sup>1</sup>H NMR (500 MHz, CDCl<sub>3</sub>) δ 8.99 (s, 1H), 7.52 (dd,

$J = 7.5, 1.6$  Hz, 1H), 7.46 (dd,  $J = 6.9, 2.3$  Hz, 1H), 7.42 (td,  $J = 6.5, 5.9, 1.8$  Hz, 2H), 7.27 (s, 1H), 3.91 (s, 3H), 1.84 (s, 3H).  $^{13}\text{C}$  NMR (126 MHz,  $\text{CDCl}_3$ )  $\delta$  168.52, 156.03, 151.79, 147.58, 136.56, 133.08, 130.99, 130.20, 129.43, 126.97, 126.58, 119.56, 110.13, 31.06, 20.06. HRMS-ESI calculated for  $\text{C}_{15}\text{H}_{12}\text{ClN}_3\text{O}_2$   $[\text{M}+\text{H}]^+$  302.0696, found 302.0685.

#### 2-(5-acetoxy-7-methyl-7H-pyrrolo[2,3-d]pyrimidin-4-yl)phenyl acetate (2dd)

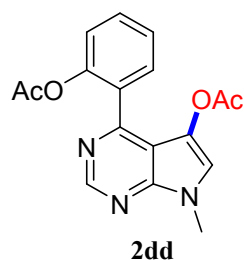

Yellow viscous oil (86% yield).  $^1\text{H}$  NMR (500 MHz,  $\text{CDCl}_3$ )  $\delta$  8.96 (s, 1H), 7.59 – 7.57 (m, 1H), 7.54 – 7.49 (m, 1H), 7.39 – 7.37 (m, 1H), 7.34 – 7.32 (m, 1H), 7.26 (s, 1H), 3.91 (s, 3H), 1.99 (s, 3H), 1.93 (s, 3H).  $^{13}\text{C}$  NMR (126 MHz,  $\text{CDCl}_3$ )  $\delta$  168.77, 168.70, 155.06, 151.70, 148.40, 147.78, 131.17, 130.30, 130.28, 126.84, 125.46, 122.69, 119.58, 109.74, 31.06, 20.75, 20.29. HRMS-ESI calculated for  $\text{C}_{17}\text{H}_{15}\text{N}_3\text{O}_4$   $[\text{M}+\text{H}]^+$  326.1141, found 326.1135.

#### 4-(3,4-difluorophenyl)-7-methyl-7H-pyrrolo[2,3-d]pyrimidin-5-yl acetate (2e)

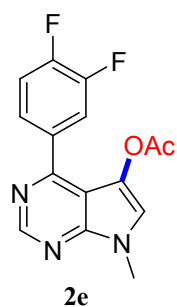

Yellow solid (80% yield). Mp: 145–148 °C.  $^1\text{H}$  NMR (500 MHz,  $\text{CDCl}_3$ )  $\delta$  8.95 (s, 1H), 7.80 – 7.76 (m, 1H), 7.72 – 7.65 (m, 1H), 7.35 (s, 1H), 7.33 – 7.29 (m, 1H), 3.92 (s, 3H), 2.15 (s, 3H).  $^{13}\text{C}$  NMR (126 MHz,  $\text{CDCl}_3$ )  $\delta$  168.41, 155.86, 151.78 ( $J_{\text{C-F}} = 146.16$  Hz), 151.67, 149.79 ( $J_{\text{C-F}} = 180.18$  Hz), 148.35, 134.69, 126.59, 125.98 ( $J_{\text{C-F}} = 6.3$  Hz), 119.78, 118.84 ( $J_{\text{C-F}} = 18.90$  Hz), 117.10 ( $J_{\text{C-F}} = 8.82$  Hz), 108.28, 31.18, 20.60; HRMS-ESI calculated for  $\text{C}_{15}\text{H}_{11}\text{F}_2\text{N}_3\text{O}_2$   $[\text{M}+\text{H}]^+$  304.0897, found 304.0889.

**4-(3,5-difluorophenyl)-7-methyl-7H-pyrrolo[2,3-d]pyrimidin-5-yl acetate (2f)**

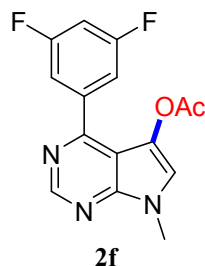

Yellow solid (77% yield). Mp: 146–148 °C. <sup>1</sup>H NMR (500 MHz, CDCl<sub>3</sub>) δ 8.97 (s, 1H), 7.52 – 7.44 (m, 2H), 7.36 (s, 1H), 7.01 – 6.93 (m, 1H), 3.93 (s, 3H), 2.16 (s, 3H). <sup>13</sup>C NMR (126 MHz, CDCl<sub>3</sub>) δ 168.49, 162.73 ( $J_{C-F} = 236.88$  Hz), 155.57, 151.66, 148.47, 140.88, 126.51, 120.09, 112.63 ( $J_{C-F} = 26.8$  Hz), 108.37, 105.01 ( $J_{C-F} = 25.2$  Hz), 31.22, 20.47. HRMS-ESI calculated for C<sub>15</sub>H<sub>11</sub>F<sub>2</sub>N<sub>3</sub>O<sub>2</sub> [M+H]<sup>+</sup> 304.0897, found 304.0893.

**7-methyl-4-(naphthalen-1-yl)-7H-pyrrolo[2,3-d]pyrimidin-5-yl acetate (2g)**

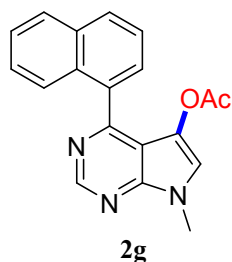

Yellow viscous solid (86% yield). Mp: 148–150 °C. <sup>1</sup>H NMR (500 MHz, CDCl<sub>3</sub>) δ 9.07 (s, 1H), 7.98 (d,  $J = 7.4$  Hz, 1H), 7.92 (d,  $J = 8.4$  Hz, 1H), 7.80 (d,  $J = 8.5$  Hz, 1H), 7.64 – 7.59 (m, 2H), 7.54 – 7.49 (m, 1H), 7.43 (m, 1H), 7.21 (s, 1H), 3.93 (s, 3H), 1.36 (s, 3H). <sup>13</sup>C NMR (126 MHz, CDCl<sub>3</sub>) δ 168.41, 157.97, 151.92, 147.76, 134.99, 133.40, 131.30, 129.48, 128.06, 127.81, 126.91, 126.52, 126.02, 125.60, 124.92, 119.48, 110.70, 31.04, 19.52. HRMS-ESI calculated for C<sub>19</sub>H<sub>15</sub>N<sub>3</sub>O<sub>2</sub> [M+H]<sup>+</sup> 318.1242, found 318.1241.

**4-(4'-(tert-butyl)-[1,1'-biphenyl]-2-yl)-7-methyl-7H-pyrrolo[2,3-d]pyrimidin-5-yl acetate (2h)**

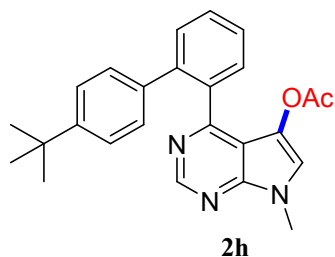

White solid (88% yield). Mp: 133–136 °C.  $^1\text{H}$  NMR (500 MHz,  $\text{CDCl}_3$ )  $\delta$  8.79 (s, 1H), 7.54 – 7.50 (m, 2H), 7.49 – 7.43 (m, 2H), 7.15 (d,  $J$  = 8.4 Hz, 2H), 7.07 (d,  $J$  = 6.6 Hz, 2H), 7.03 (s, 1H), 3.83 (s, 3H), 1.81 (s, 3H), 1.23 (s, 9H).  $^{13}\text{C}$  NMR (126 MHz,  $\text{CDCl}_3$ )  $\delta$  168.89, 159.59, 151.55, 149.40, 147.65, 141.30, 137.37, 135.96, 130.21, 130.17, 129.09, 128.77, 126.97, 126.44, 124.73, 118.91, 110.42, 34.32, 31.22, 30.90, 19.99. HRMS-ESI calculated for  $\text{C}_{25}\text{H}_{25}\text{N}_3\text{O}_2$   $[\text{M}+\text{H}]^+$  400.2020, found 400.2012.

**7-methyl-4-(thiophen-2-yl)-7H-pyrrolo[2,3-d]pyrimidin-5-yl acetate (2i)**

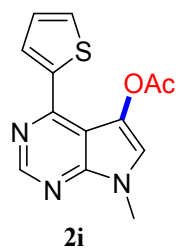

Yellow solid (93% yield). Mp: 144–146 °C.  $^1\text{H}$  NMR (500 MHz,  $\text{CDCl}_3$ )  $\delta$  8.76 (s, 1H), 7.97 (m, 1H), 7.49 (m, 1H), 7.29 (s, 1H), 7.13 – 7.10 (m, 1H), 3.79 (s, 3H), 2.24 (s, 3H).  $^{13}\text{C}$  NMR (126 MHz,  $\text{CDCl}_3$ )  $\delta$  168.27, 151.25, 148.34, 135.82, 130.13, 129.85, 129.17, 127.79, 126.72, 119.99, 119.45, 31.15, 21.05. HRMS-ESI calculated for  $\text{C}_{13}\text{H}_{11}\text{N}_3\text{O}_2\text{S}$   $[\text{M}+\text{H}]^+$  274.0645, found 274.0645.

**7-methyl-4-phenyl-7H-pyrrolo[2,3-d]pyrimidin-5-yl propionate (2ja)**

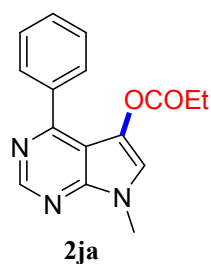

White solid (84% yield). Mp: 93–96 °C.  $^1\text{H}$  NMR (500 MHz,  $\text{CDCl}_3$ )  $\delta$  8.94 (s, 1H), 7.82 (dd,  $J$  = 6.3, 3.0 Hz, 2H), 7.47 (dd,  $J$  = 4.7, 1.9 Hz, 3H), 7.24 (s, 1H), 3.86 (s, 3H),



2.30 (q,  $J = 7.5$  Hz, 2H), 0.99 (t,  $J = 7.5$  Hz, 3H).  $^{13}\text{C}$  NMR (126 MHz,  $\text{CDCl}_3$ )  $\delta$  172.07, 158.36, 151.58, 148.14, 137.66, 129.54, 129.35, 127.97, 126.88, 119.20, 108.59, 30.97, 27.14, 8.51. HRMS-ESI calculated for  $\text{C}_{16}\text{H}_{15}\text{N}_3\text{O}_2$   $[\text{M}+\text{H}]^+$  282.1237, found 282.1238.

#### 7-methyl-4-(p-tolyl)-7H-pyrrolo[2,3-d]pyrimidin-5-yl propionate (2jb)

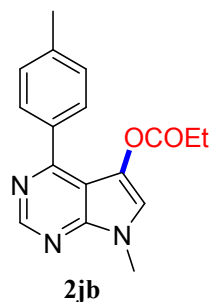

White solid (85% yield). Mp: 113–115 °C.  $^1\text{H}$  NMR (500 MHz,  $\text{CDCl}_3$ )  $\delta$  8.94 (s, 1H), 7.75 (d,  $J = 8.1$  Hz, 2H), 7.30 (d,  $J = 7.8$  Hz, 2H), 7.27 (d,  $J = 7.8$  Hz, 1H), 3.89 (s, 3H), 2.44 (s, 3H), 2.36 (q,  $J = 7.5$  Hz, 2H), 1.04 (t,  $J = 7.5$  Hz, 3H).  $^{13}\text{C}$  NMR (126 MHz,  $\text{CDCl}_3$ )  $\delta$  172.20, 158.55, 151.67, 148.24, 139.82, 134.95, 129.42, 128.77, 127.05, 119.08, 108.54, 31.07, 27.32, 21.42, 8.59. HRMS-ESI calculated for  $\text{C}_{17}\text{H}_{17}\text{N}_3\text{O}_2$   $[\text{M}+\text{H}]^+$  296.1394, found 296.1392.

#### 4-(4-(tert-butyl)phenyl)-7-methyl-7H-pyrrolo[2,3-d]pyrimidin-5-yl propionate (2jc)

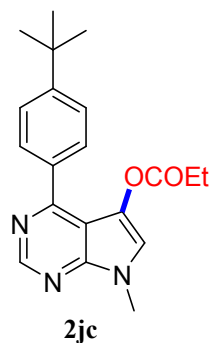

White solid (85% yield). Mp: 105–108 °C.  $^1\text{H}$  NMR (500 MHz,  $\text{CDCl}_3$ )  $\delta$  8.95 (s, 1H), 7.77 (d,  $J = 8.3$  Hz, 2H), 7.52 (d,  $J = 8.3$  Hz, 2H), 7.23 (s, 1H), 3.91 (s, 3H), 2.33 (q,  $J = 7.5$  Hz, 2H), 1.38 (s, 9H), 0.99 (t,  $J = 7.5$  Hz, 3H).  $^{13}\text{C}$  NMR (126 MHz,  $\text{CDCl}_3$ )  $\delta$  172.26, 158.66, 152.92, 151.76, 148.32, 134.94, 129.15, 127.11, 125.07, 119.09, 108.74, 34.81, 31.30, 31.09, 27.25, 8.60. HRMS-ESI calculated for  $\text{C}_{20}\text{H}_{23}\text{N}_3\text{O}_2$   $[\text{M}+\text{H}]^+$  338.1863, found 338.1864.

#### 4-(4-fluorophenyl)-7-methyl-7H-pyrrolo[2,3-d]pyrimidin-5-yl propionate (2jd)

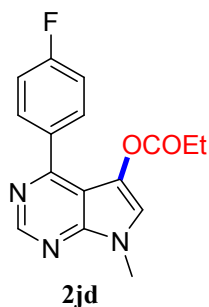

White solid (91% yield). Mp: 69–73 °C. <sup>1</sup>H NMR (500 MHz, CDCl<sub>3</sub>) δ 8.94 (s, 1H), 7.90 – 7.82 (m, 2H), 7.29 (d, *J* = 16.3 Hz, 1H), 7.25 – 7.16 (m, 2H), 3.91 (s, 3H), 2.37 (q, *J* = 7.6 Hz, 2H), 1.07 (t, *J* = 7.5 Hz, 3H). <sup>13</sup>C NMR (126 MHz, CDCl<sub>3</sub>) δ 172.07, 163.89 (*J*<sub>C-F</sub> = 249.48 Hz), 157.29, 151.69, 148.24, 133.96 (*J*<sub>C-F</sub> = 3.78 Hz), 131.53 (*J*<sub>C-F</sub> = 8.82 Hz), 126.89, 119.36, 115.13 (*J*<sub>C-F</sub> = 21.42 Hz), 108.50, 31.14, 27.35, 8.69. HRMS-ESI calculated for C<sub>16</sub>H<sub>14</sub>FN<sub>3</sub>O<sub>2</sub> [M+H]<sup>+</sup> 300.1143, found 300.1142.

**7-methyl-4-(naphthalen-1-yl)-7H-pyrrolo[2,3-d]pyrimidin-5-yl propionate (2je)**

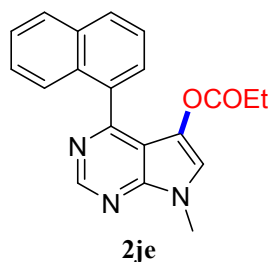

White solid (89% yield). Mp: 130–133 °C. <sup>1</sup>H NMR (500 MHz, CDCl<sub>3</sub>) δ 9.06 (s, 1H), 7.95 (dd, *J* = 26.7, 7.9 Hz, 2H), 7.77 (d, *J* = 8.5 Hz, 1H), 7.64 – 7.56 (m, 2H), 7.55 – 7.47 (m, 1H), 7.42 (t, *J* = 7.6 Hz, 1H), 7.24 (s, 1H), 3.94 (s, 3H), 1.60 (q, *J* = 7.5 Hz, 2H), 0.62 (t, *J* = 7.5 Hz, 3H). <sup>13</sup>C NMR (126 MHz, CDCl<sub>3</sub>) δ 171.86, 158.01, 151.95, 147.75, 135.23, 133.43, 131.33, 129.43, 128.07, 127.75, 127.06, 126.50, 126.00, 125.63, 124.96, 119.41, 110.86, 31.11, 26.42, 8.13. HRMS-ESI calculated for C<sub>20</sub>H<sub>17</sub>N<sub>3</sub>O<sub>2</sub> [M+H]<sup>+</sup> 332.1394, found 332.1398.

**4-(3-chlorophenyl)-7-methyl-7H-pyrrolo[2,3-d]pyrimidin-5-yl propionate (2jf)**

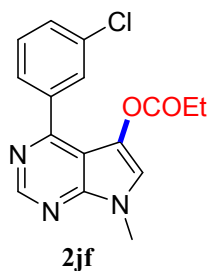

White solid (89% yield). Mp: 73–76°C. <sup>1</sup>H NMR (500 MHz, CDCl<sub>3</sub>) δ 8.96 (s, 1H), 7.89–7.77 (m, 2H), 7.50–7.42 (m, 2H), 7.34 (s, 1H), 3.91 (s, 3H), 2.43 (q, *J* = 7.5 Hz, 2H), 1.07 (t, *J* = 7.5 Hz, 3H). <sup>13</sup>C NMR (126 MHz, CDCl<sub>3</sub>) δ 172.10, 156.70, 151.63, 148.27, 139.47, 133.90, 129.73, 129.68, 129.54, 127.67, 126.82, 119.63, 108.53, 31.15, 27.25, 8.66. HRMS-ESI calculated for C<sub>16</sub>H<sub>14</sub>ClN<sub>3</sub>O<sub>2</sub> [M+H]<sup>+</sup> 316.0847, found 316.0844.

**tert-butyl (7-methyl-4-phenyl-7*H*-pyrrolo[2,3-*d*]pyrimidin-5-yl) carbonate (2k)**

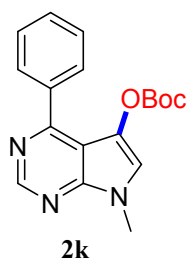

Brown viscous oil (27% yield). <sup>1</sup>H NMR (400 MHz, CDCl<sub>3</sub>) δ 8.83 (s, 1H), 7.95–7.91 (m, 2H), 7.49 (q, *J* = 7.5 Hz, 3H), 7.29 (s, 1H), 3.14 (s, 3H), 0.09 (s, 9H). <sup>13</sup>C NMR (500 MHz, CDCl<sub>3</sub>) δ 164.68, 164.18, 163.45, 158.23, 139.67, 130.85, 129.96, 129.17, 128.68, 126.57, 109.91, 50.85, 29.70, 1.02. HRMS-ESI calculated for C<sub>18</sub>H<sub>19</sub>N<sub>3</sub>O<sub>3</sub> [M-H]<sup>+</sup> 324.1354, found 324.1321.

**5-iodo-7-methyl-4-phenyl-7*H*-pyrrolo[2,3-*d*]pyrimidine (2l)**

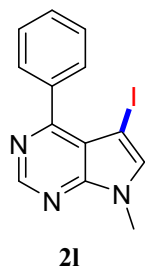

White solid (73% yield). MP:142-144 °C. <sup>1</sup>H NMR (500 MHz, CDCl<sub>3</sub>) δ 8.95 (s, 1H), 7.72 (dd, *J* = 6.6, 3.0 Hz, 2H), 7.52 (dd, *J* = 4.7, 1.9 Hz, 3H), 7.36 (d, *J* = 1.2 Hz, 1H), 3.90 (d, *J* = 1.7 Hz, 3H). <sup>13</sup>C NMR (126 MHz, CDCl<sub>3</sub>) δ 160.35, 151.20, 135.78, 135.56, 130.87, 129.53, 127.70, 116.57, 51.33, 31.34. HRMS-ESI calculated for C<sub>13</sub>H<sub>10</sub>IN<sub>3</sub> [M+H]<sup>+</sup> 335.9992, found 335.9992.

**2-(7-methyl-7*H*-pyrrolo[2,3-*d*]pyrimidin-4-yl)phenyl acetate (3aa)**

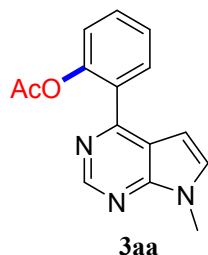

Yellow oil (69% yield).  $^1\text{H}$  NMR (500 MHz,  $\text{CDCl}_3$ )  $\delta$  8.97 (s, 1H), 7.79 – 7.78 (m, 1H), 7.63 – 7.53 (m, 1H), 7.42 (t,  $J = 1.2$  Hz, 1H), 7.28 (t,  $J = 4.9$  Hz, 1H), 7.22 (d,  $J = 3.6$  Hz, 1H), 6.57 (d,  $J = 3.6$  Hz, 1H), 3.93 (s, 3H), 2.07 (s, 3H).  $^{13}\text{C}$  NMR (126 MHz,  $\text{CDCl}_3$ )  $\delta$  169.30, 155.67, 151.50, 151.26, 148.38, 131.24, 130.54, 129.89, 126.15, 123.45, 117.16, 100.26, 31.22, 20.94 (one  $\text{sp}^2$  signal were not observed because of overlapping). HRMS-ESI calculated for  $\text{C}_{15}\text{H}_{13}\text{N}_3\text{O}_2$   $[\text{M}+\text{H}]^+$  268.1086, found 268.1085.

**2-(7-propyl-7H-pyrrolo[2,3-d]pyrimidin-4-yl)phenyl acetate (3ab)**

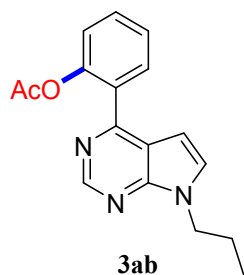

Yellow oil (65% yield).  $^1\text{H}$  NMR (600 MHz,  $\text{CDCl}_3$ )  $\delta$  8.94 (s, 1H), 7.79 (d,  $J = 7.6$  Hz, 1H), 7.51 (t,  $J = 7.8$  Hz, 1H), 7.39 (t,  $J = 7.5$  Hz, 1H), 7.27 (t,  $J = 8.7$  Hz, 1H), 7.24 (d,  $J = 3.5$  Hz, 1H), 6.55 (d,  $J = 3.5$  Hz, 1H), 4.28 – 4.24 (m, 2H), 2.05 (s, 3H), 1.92 (h,  $J = 7.3$  Hz, 2H), 0.95 (t,  $J = 7.4$  Hz, 3H).  $^{13}\text{C}$  NMR (151 MHz,  $\text{CDCl}_3$ )  $\delta$  169.31, 155.54, 151.17, 151.06, 148.35, 131.23, 130.86, 130.49, 128.99, 126.14, 123.44, 117.17, 100.10, 46.32, 23.55, 20.92, 11.30. HRMS-ESI calculated for  $\text{C}_{17}\text{H}_{17}\text{N}_3\text{O}_2$   $[\text{M}+\text{H}]^+$  296.1394, found 296.1393.

**2-(7-tosyl-7H-pyrrolo[2,3-d]pyrimidin-4-yl)phenyl acetate (3ac)**

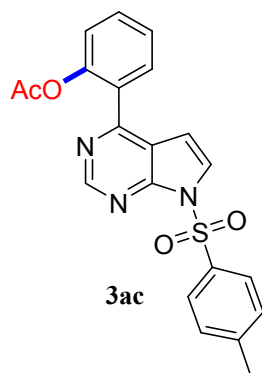

Yellow oil (73% yield).  $^1\text{H}$  NMR (600 MHz,  $\text{CDCl}_3$ )  $\delta$  8.99 (s, 1H), 8.06 (d,  $J = 8.4$  Hz, 2H), 7.68 (d,  $J = 4.0$  Hz, 1H), 7.58 (d,  $J = 7.7$  Hz, 1H), 7.45 (t,  $J = 7.8$  Hz, 1H), 7.31 (t,  $J = 7.6$  Hz, 1H), 7.26 (d,  $J = 8.2$  Hz, 2H), 7.19 (d,  $J = 2.3$  Hz, 1H), 6.59 (d,  $J = 4.0$  Hz, 1H), 2.33 (s, 3H), 1.94 (s, 3H).  $^{13}\text{C}$  NMR (151 MHz,  $\text{CDCl}_3$ )  $\delta$  169.09, 156.92, 153.01, 151.59, 148.23, 146.04, 134.74, 131.22, 131.12, 129.96, 129.75, 128.39, 126.78, 126.35, 123.62, 119.13, 104.42, 21.73, 20.86. HRMS-ESI calculated for  $\text{C}_{21}\text{H}_{17}\text{N}_3\text{O}_4\text{S}$   $[\text{M}+\text{H}]^+$  408.1013, found 408.1011.

**2-(7-benzyl-7H-pyrrolo[2,3-d]pyrimidin-4-yl)phenyl acetate (3ad)**

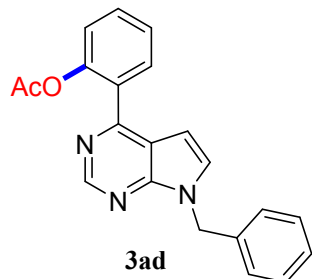

Yellow oil (73% yield).  $^1\text{H}$  NMR (500 MHz,  $\text{CDCl}_3$ )  $\delta$  9.00 (s, 1H), 7.81 (dd,  $J = 7.7$ , 1.7 Hz, 1H), 7.53 (td,  $J = 7.9$ , 1.6 Hz, 1H), 7.42 (td,  $J = 7.6$ , 1.0 Hz, 1H), 7.38 – 7.31 (m, 3H), 7.31 – 7.28 (m, 1H), 7.28 – 7.27 (m, 1H), 7.26 (s, 1H), 7.22 (d,  $J = 3.6$  Hz, 1H), 6.60 (d,  $J = 3.6$  Hz, 1H), 5.51 (s, 2H), 2.08 (s, 3H).  $^{13}\text{C}$  NMR (101 MHz,  $\text{CDCl}_3$ )  $\delta$  169.36, 155.76, 151.46, 148.37, 136.76, 131.26, 130.77, 130.61, 128.97, 128.92, 128.82, 128.05, 127.66, 126.20, 123.50, 117.10, 100.90, 48.02, 20.96. HRMS-ESI calculated for  $\text{C}_{21}\text{H}_{17}\text{N}_3\text{O}_2$   $[\text{M}+\text{H}]^+$  344.1394, found 344.1397.

**2-(7-((2-(trimethylsilyl)ethoxy)methyl)-7H-pyrrolo[2,3-d]pyrimidin-4-yl)phenyl acetate (3ae)**

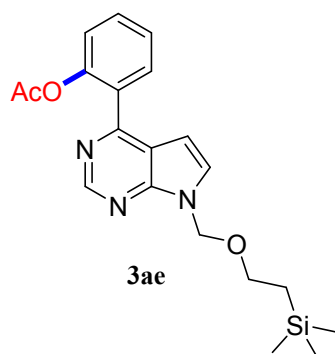

Yellow oil (61% yield).  $^1\text{H}$  NMR (600 MHz,  $\text{CDCl}_3$ )  $\delta$  8.99 (s, 1H), 7.79 (dd,  $J = 7.7$ , 1.6 Hz, 1H), 7.54 (td,  $J = 7.8$ , 1.6 Hz, 1H), 7.42 (t,  $J = 7.2$  Hz, 1H), 7.39 (d,  $J = 3.7$  Hz, 1H), 7.30 – 7.27 (m, 1H), 6.63 (d,  $J = 3.7$  Hz, 1H), 5.70 (s, 2H), 3.61 – 3.57 (m, 2H), 2.06 (s, 3H), 0.96 – 0.92 (m, 2H), -0.04 (s, 9H).  $^{13}\text{C}$  NMR (151 MHz,  $\text{CDCl}_3$ )  $\delta$  169.21, 155.85, 152.02, 151.60, 148.33, 131.23, 130.69, 130.57, 128.77, 126.20, 123.45, 117.23, 101.65, 72.90, 66.64, 20.90, 17.73, -1.44. HRMS-ESI calculated for  $\text{C}_{20}\text{H}_{25}\text{N}_3\text{O}_3\text{Si}$   $[\text{M}+\text{H}]^+$  384.1738, found 384.1744.

**5-methyl-2-(7-methyl-7H-pyrrolo[2,3-d]pyrimidin-4-yl)phenyl acetate (3ba)**

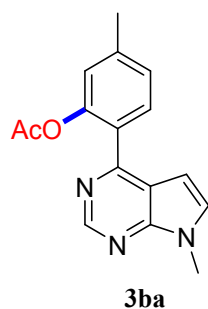

Yellow oil (69% yield).  $^1\text{H}$  NMR (500 MHz,  $\text{CDCl}_3$ )  $\delta$  8.94 (s, 1H), 7.68 (d,  $J = 7.8$  Hz, 1H), 7.23 – 7.20 (m, 1H), 7.19 (d,  $J = 3.5$  Hz, 1H), 7.08 (s, 1H), 6.56 (d,  $J = 3.6$  Hz, 1H), 3.90 (s, 3H), 2.45 (s, 3H), 2.06 (s, 3H).  $^{13}\text{C}$  NMR (126 MHz,  $\text{CDCl}_3$ )  $\delta$  169.36, 155.71, 151.41, 151.16, 148.21, 141.13, 130.98, 129.68, 127.88, 126.95, 123.91, 117.02, 100.28, 31.13, 21.26, 20.90. HRMS-ESI calculated for  $\text{C}_{16}\text{H}_{15}\text{N}_3\text{O}_2$   $[\text{M}+\text{H}]^+$  282.1242, found 282.1249.

**5-(tert-butyl)-2-(7-methyl-7H-pyrrolo[2,3-d]pyrimidin-4-yl)phenyl acetate (3bb)**

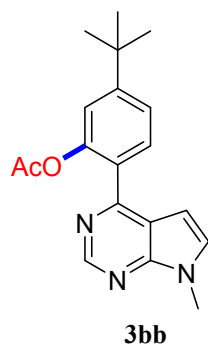

Yellow oil (75% yield). <sup>1</sup>H NMR (500 MHz, CDCl<sub>3</sub>) δ 8.95 (s, 1H), 7.73 (d, *J* = 8.1 Hz, 1H), 7.43 (dd, *J* = 8.1, 1.9 Hz, 1H), 7.25 (d, *J* = 1.9 Hz, 1H), 7.20 (d, *J* = 3.6 Hz, 1H), 6.60 (dd, *J* = 3.5, 0.7 Hz, 1H), 3.91 (d, *J* = 0.9 Hz, 3H), 2.07 (s, 3H), 1.38 (s, 9H). <sup>13</sup>C NMR (126 MHz, CDCl<sub>3</sub>) δ 169.31, 155.78, 154.46, 151.45, 151.18, 148.16, 130.77, 129.63, 128.81, 127.84, 123.23, 120.39, 116.90, 100.36, 34.90, 31.14, 20.96. HRMS-ESI calculated for C<sub>19</sub>H<sub>21</sub>N<sub>3</sub>O<sub>2</sub> [M+H]<sup>+</sup> 324.1707, found 324.1712.

**5-methoxy-2-(7-methyl-7H-pyrrolo[2,3-d]pyrimidin-4-yl)phenyl acetate (3bc)**

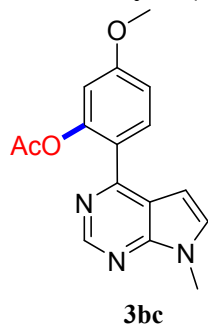

Yellow oil (43% yield). <sup>1</sup>H NMR (500 MHz, CDCl<sub>3</sub>) δ 8.94 (s, 1H), 7.75 (d, *J* = 8.6 Hz, 1H), 7.20 (d, *J* = 3.5 Hz, 1H), 6.97 – 6.95 (m, 1H), 6.81 (d, *J* = 2.5 Hz, 1H), 6.59 (d, *J* = 3.5 Hz, 1H), 3.91 (s, 3H), 3.89 (s, 3H), 2.09 (s, 3H). <sup>13</sup>C NMR (126 MHz, CDCl<sub>3</sub>) δ 161.43, 155.62, 151.23, 149.55, 132.11, 130.89, 129.58, 128.83, 123.34, 116.88, 112.17, 109.08, 100.38, 55.64, 29.71, 20.98. HRMS-ESI calculated for C<sub>16</sub>H<sub>15</sub>N<sub>3</sub>O<sub>3</sub> [M+H]<sup>+</sup> 298.1191, found 298.1188.

**5-cyano-2-(7-methyl-7H-pyrrolo[2,3-d]pyrimidin-4-yl)phenyl acetate (3bd)**

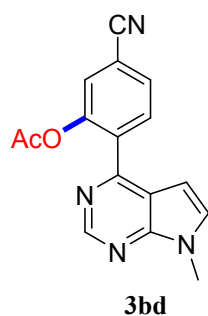

Yellow oil (69% yield).  $^1\text{H}$  NMR (500 MHz,  $\text{CDCl}_3$ )  $\delta$  8.99 (s, 1H), 7.91 (d,  $J = 8.0$  Hz, 1H), 7.71 (dd,  $J = 8.0, 1.5$  Hz, 1H), 7.60 (d,  $J = 1.5$  Hz, 1H), 7.31 – 7.26 (m, 1H), 6.52 (d,  $J = 3.6$  Hz, 1H), 3.95 (s, 3H), 2.09 (s, 3H).  $^{13}\text{C}$  NMR (101 MHz,  $\text{CDCl}_3$ )  $\delta$  168.63, 153.46, 151.62, 151.23, 148.53, 135.66, 132.22, 130.83, 129.71, 127.41, 117.62, 117.04, 114.05, 99.71, 31.35, 20.80. HRMS-ESI calculated for  $\text{C}_{16}\text{H}_{12}\text{N}_4\text{O}_2$   $[\text{M}+\text{H}]^+$  293.1033, found 293.1042.

**2-(7-methyl-7H-pyrrolo[2,3-d]pyrimidin-4-yl)-5-(trifluoromethyl)phenyl acetate (3be)**

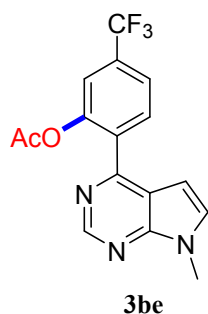

Yellow oil (74% yield).  $^1\text{H}$  NMR (500 MHz,  $\text{CDCl}_3$ )  $\delta$  8.99 (s, 1H), 7.91 (d,  $J = 8.0$  Hz, 1H), 7.67 (m, 1H), 7.56 (s, 1H), 7.26 (d,  $J = 3.6$  Hz, 1H), 6.54 (d,  $J = 3.6$  Hz, 1H), 3.94 (s, 3H), 2.08 (s, 3H).  $^{13}\text{C}$  NMR (126 MHz,  $\text{CDCl}_3$ )  $\delta$  168.75, 154.12, 151.61, 151.26, 148.51, 134.41, 132.55 ( $J_{\text{C-F}} = 34.0$  Hz), 131.89, 130.48, 124.48, 122.92 ( $J_{\text{C-F}} = 3.8$  Hz), 120.93 ( $J_{\text{C-F}} = 3.8$  Hz), 117.10, 99.86, 31.26, 20.78. HRMS-ESI calculated for  $\text{C}_{16}\text{H}_{12}\text{F}_3\text{N}_3\text{O}_2$   $[\text{M}+\text{H}]^+$  336.0960, found 336.0966.

**5-fluoro-2-(7-methyl-7H-pyrrolo[2,3-d]pyrimidin-4-yl)phenyl acetate (3bf)**



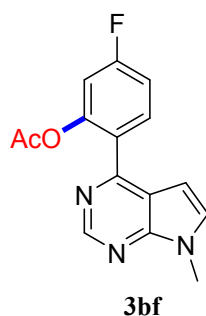

Yellow oil (79% yield).  $^1\text{H}$  NMR (500 MHz,  $\text{CDCl}_3$ )  $\delta$  8.96 (s, 1H), 7.79 – 7.76 (m, 1H), 7.23 (d,  $J = 3.6$  Hz, 1H), 7.15 – 7.13 (m, 1H), 7.04 (m, 1H), 6.54 (d,  $J = 3.6$  Hz, 1H), 3.93 (s, 3H), 2.07 (s, 3H).  $^{13}\text{C}$  NMR (126 MHz,  $\text{CDCl}_3$ )  $\delta$  168.79, 162.36, 154.79, 151.24, 149.38 ( $J_{\text{C-F}} = 11.34$  Hz), 132.42 ( $J_{\text{C-F}} = 8.8$  Hz), 130.04, 127.16, 119.66, 117.06, 113.41 ( $J_{\text{C-F}} = 21.4$  Hz), 111.36 ( $J_{\text{C-F}} = 25.2$  Hz), 100.06, 31.24, 20.85. HRMS-ESI calculated for  $\text{C}_{15}\text{H}_{12}\text{FN}_3\text{O}_2$   $[\text{M}+\text{H}]^+$  286.0992, found 286.0993.

**5-chloro-2-(7-methyl-7H-pyrrolo[2,3-d]pyrimidin-4-yl)phenyl acetate (3bg)**

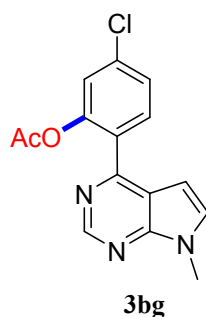

Yellow oil (67% yield).  $^1\text{H}$  NMR (500 MHz,  $\text{CDCl}_3$ )  $\delta$  8.99 (s, 1H), 8.08 (d,  $J = 2.0$  Hz, 1H), 7.78 (m, 1H), 7.41 (d,  $J = 8.5$  Hz, 1H), 7.26 (d,  $J = 3.6$  Hz, 1H), 6.54 (d,  $J = 3.6$  Hz, 1H), 3.93 (s, 3H), 2.08 (s, 3H).  $^{13}\text{C}$  NMR (126 MHz,  $\text{CDCl}_3$ )  $\delta$  168.68, 153.97, 151.56, 151.24, 150.84, 131.58, 130.51, 128.65, 128.42, 127.43, 124.18, 117.06, 99.79, 31.24, 20.83. HRMS-ESI calculated for  $\text{C}_{15}\text{H}_{12}\text{ClN}_3\text{O}_2$   $[\text{M}+\text{H}]^+$  302.0691, found 302.0680.

**4-(7-methyl-7H-pyrrolo[2,3-d]pyrimidin-4-yl)-[1,1'-biphenyl]-3-yl acetate (3bh)**

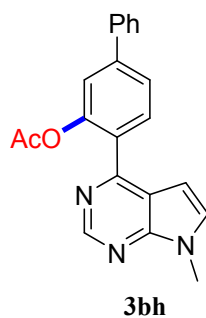

Yellow oil (63% yield). <sup>1</sup>H NMR (600 MHz, CDCl<sub>3</sub>) δ 9.00 (s, 1H), 7.89 (d, *J* = 8.0 Hz, 1H), 7.69 – 7.65 (m, 3H), 7.52 – 7.47 (m, 3H), 7.41 (t, *J* = 7.4 Hz, 1H), 7.24 (d, *J* = 3.5 Hz, 1H), 6.64 (d, *J* = 3.5 Hz, 1H), 3.94 (s, 3H), 2.12 (s, 3H). <sup>13</sup>C NMR (151 MHz, CDCl<sub>3</sub>) δ 169.32, 155.39, 151.51, 151.24, 148.75, 143.82, 139.55, 131.65, 129.96, 129.52, 128.93, 128.08, 127.22, 124.78, 122.06, 117.07, 100.32, 31.24, 21.00. HRMS-ESI calculated for C<sub>21</sub>H<sub>17</sub>N<sub>3</sub>O<sub>2</sub> [M+H]<sup>+</sup> 344.1394, found 344.1389.

**4-methoxy-2-(7-methyl-7H-pyrrolo[2,3-d]pyrimidin-4-yl)phenyl acetate (3ca)**

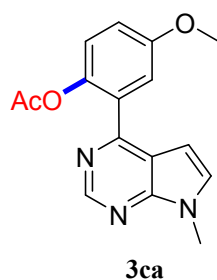

Yellow oil (63% yield). <sup>1</sup>H NMR (500 MHz, CDCl<sub>3</sub>) δ 8.96 (s, 1H), 7.29 (d, *J* = 3.1 Hz, 1H), 7.21 (d, *J* = 3.6 Hz, 1H), 7.18 (d, *J* = 8.9 Hz, 1H), 7.04 (m, 1H), 6.58 (d, *J* = 3.5 Hz, 1H), 3.91 (s, 3H), 3.86 (s, 3H), 2.03 (s, 3H). <sup>13</sup>C NMR (126 MHz, CDCl<sub>3</sub>) δ 169.63, 157.31, 155.45, 151.46, 151.21, 141.82, 131.45, 129.92, 124.23, 117.07, 116.16, 115.75, 100.27, 55.76, 31.19, 20.84. ESI calculated for C<sub>16</sub>H<sub>15</sub>N<sub>3</sub>O<sub>3</sub> [M+H]<sup>+</sup> 298.1191, found 298.1191.

**2-(7-methyl-7H-pyrrolo[2,3-d]pyrimidin-4-yl)-4-(trifluoromethyl)phenyl acetate (3cb)**

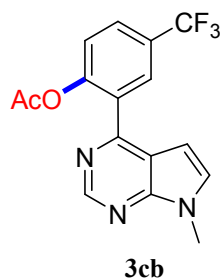

Yellow oil (25% yield).  $^1\text{H}$  NMR (400 MHz,  $\text{CDCl}_3$ )  $\delta$  8.99 (s, 1H), 8.09 (d,  $J = 2.3$  Hz, 1H), 7.79 (dd,  $J = 8.5, 2.3$  Hz, 1H), 7.42 (d,  $J = 8.5$  Hz, 1H), 7.27 (d,  $J = 3.6$  Hz, 1H), 6.55 (d,  $J = 3.5$  Hz, 1H), 3.94 (s, 3H), 2.09 (s, 3H).  $^{13}\text{C}$  NMR (101 MHz,  $\text{CDCl}_3$ )  $\delta$  168.72, 153.99, 151.59, 151.27, 150.86 ( $J_{\text{C-F}} = 1.01$  Hz), 131.61, 130.51, 128.65 ( $J_{\text{C-F}} = 8.08$  Hz), 128.41, 127.44 ( $J_{\text{C-F}} = 7.07$  Hz), 124.21, 123.71 ( $J_{\text{C-F}} = 273.71$  Hz), 117.06, 99.80, 31.27, 20.87. ESI calculated for  $\text{C}_{16}\text{H}_{12}\text{F}_3\text{N}_3\text{O}_2$   $[\text{M}+\text{H}]^+$  336.0960, found 336.0956.

**4-cyano-2-(7-methyl-7H-pyrrolo[2,3-d]pyrimidin-4-yl)phenyl acetate (3cc)**

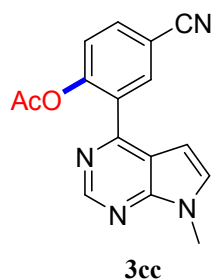

Yellow oil (35% yield).  $^1\text{H}$  NMR (500 MHz,  $\text{CDCl}_3$ )  $\delta$  8.99 (s, 1H), 8.11 (d,  $J = 2.0$  Hz, 1H), 7.84 – 7.81 (m, 1H), 7.42 (d,  $J = 8.4$  Hz, 1H), 7.29 (d,  $J = 3.6$  Hz, 1H), 6.53 (d,  $J = 3.6$  Hz, 1H), 3.95 (s, 3H), 2.10 (s, 3H).  $^{13}\text{C}$  NMR (126 MHz,  $\text{CDCl}_3$ )  $\delta$  168.39, 153.12, 151.67, 151.64, 151.27, 135.38, 134.00, 132.44, 130.77, 124.86, 117.89, 117.00, 110.39, 99.62, 31.32, 20.85. HRMS-ESI calculated for  $\text{C}_{16}\text{H}_{12}\text{N}_4\text{O}_2$   $[\text{M}+\text{H}]^+$  293.1038, found 293.1032.

**4-chloro-2-(7-methyl-7H-pyrrolo[2,3-d]pyrimidin-4-yl)phenyl acetate (3cd)**

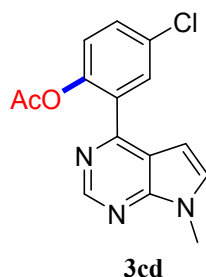

Yellow oil (83% yield).  $^1\text{H}$  NMR (500 MHz,  $\text{CDCl}_3$ )  $\delta$  8.97 (s, 1H), 7.77 (d,  $J = 2.6$  Hz, 1H), 7.48 (dd,  $J = 8.7, 2.6$  Hz, 1H), 7.25 (d,  $J = 3.6$  Hz, 1H), 7.22 (d,  $J = 8.7$  Hz, 1H), 6.57 (d,  $J = 3.6$  Hz, 1H), 3.93 (s, 3H), 2.06 (s, 3H).  $^{13}\text{C}$  NMR (126 MHz,  $\text{CDCl}_3$ )  $\delta$  169.04, 154.10, 151.55, 151.22, 146.83, 132.32, 131.57, 131.01, 130.38, 130.32, 124.85, 117.00, 99.96, 31.26, 20.86. HRMS-ESI calculated for  $\text{C}_{15}\text{H}_{12}\text{ClN}_3\text{O}_2$   $[\text{M}+\text{H}]^+$  302.0691, found 302.0677.

**4-methyl-2-(7-methyl-7H-pyrrolo[2,3-d]pyrimidin-4-yl)phenyl acetate (3ce)**

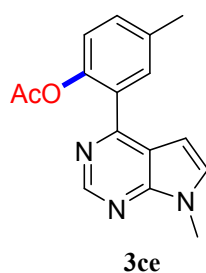

Yellow oil (85% yield).  $^1\text{H}$  NMR (600 MHz,  $\text{CDCl}_3$ )  $\delta$  8.98 (s, 1H), 7.59 (d,  $J = 1.8$  Hz, 1H), 7.33 (dd,  $J = 8.2, 2.0$  Hz, 1H), 7.22 (d,  $J = 3.5$  Hz, 1H), 7.16 (d,  $J = 8.2$  Hz, 1H), 6.57 (d,  $J = 3.5$  Hz, 1H), 3.92 (s, 3H), 2.44 (s, 3H), 2.04 (s, 3H).  $^{13}\text{C}$  NMR (151 MHz,  $\text{CDCl}_3$ )  $\delta$  169.48, 155.63, 151.37, 151.17, 146.08, 135.93, 131.59, 131.22, 130.29, 129.89, 123.06, 117.13, 100.40, 31.23, 20.94, 20.92. HRMS-ESI calculated for  $\text{C}_{16}\text{H}_{15}\text{N}_3\text{O}_2$   $[\text{M}+\text{H}]^+$  282.1237, found 282.1233.

**4-chloro-7-methyl-7H-pyrrolo[2,3-d]pyrimidin-5-yl acetate (5a)**

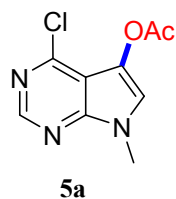

White solid (83% yield). Mp: 148–151 °C.  $^1\text{H}$  NMR (500 MHz,  $\text{CDCl}_3$ )  $\delta$  8.61 (s, 1H), 7.26 (s, 1H), 3.85 (s, 3H), 2.37 (s, 3H).  $^{13}\text{C}$  NMR (500 MHz,  $\text{CDCl}_3$ )  $\delta$  169.03, 151.07, 150.58, 147.88, 126.44, 119.88, 109.49, 31.36, 20.75. HRMS-ESI calculated for  $\text{C}_9\text{H}_8\text{ClN}_3\text{O}_2$   $[\text{M}+\text{H}]^+$  226.0378, found 226.0380.

**4-methoxy-7-methyl-7H-pyrrolo[2,3-d]pyrimidin-5-yl acetate (5b)**

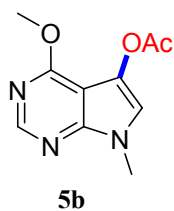

White solid (93% yield). Mp: 102–105 °C. <sup>1</sup>H NMR (500 MHz, CDCl<sub>3</sub>) δ 8.44 (s, 1H), 7.01 (s, 1H), 4.09 (s, 3H), 3.80 (s, 3H), 2.34 (s, 3H). <sup>13</sup>C NMR (126 MHz, CDCl<sub>3</sub>) δ 169.23, 162.48, 151.36, 148.45, 127.14, 116.02, 98.54, 53.81, 31.23, 20.75. HRMS-ESI calculated for C<sub>10</sub>H<sub>11</sub>N<sub>3</sub>O<sub>2</sub> [M+H]<sup>+</sup> 222.0873, found 222.0872.

#### 4-(diethylamino)-7-methyl-7H-pyrrolo[2,3-d]pyrimidin-5-yl acetate (5c)

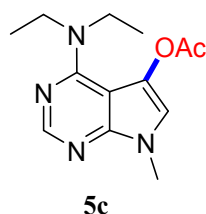

Brown viscous oil (55% yield). <sup>1</sup>H NMR (500 MHz, CDCl<sub>3</sub>) δ 8.28 (s, 1H), 7.07 (s, 1H), 3.72 (dd, *J* = 13.4, 6.3 Hz, 7H), 2.31 (s, 3H), 1.24 (t, *J* = 7.0 Hz, 6H). <sup>13</sup>C NMR (126 MHz, CDCl<sub>3</sub>) δ 168.42, 158.29, 156.47, 150.91, 147.81, 126.36, 114.66, 43.58, 31.25, 21.34, 13.48. HRMS-ESI calculated for C<sub>13</sub>H<sub>18</sub>N<sub>4</sub>O<sub>2</sub> [M+H]<sup>+</sup> 263.1503, found 263.1502.

#### 2-(acetoxymethyl)-5-(4-methoxy-7H-pyrrolo[2,3-d]pyrimidin-7-yl)tetrahydrofuran-3,4-diyl diacetate (6)

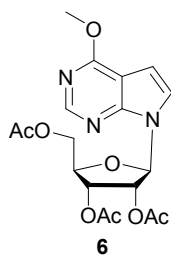

Colorless oil (64%, yield), <sup>1</sup>H NMR (500 MHz, CDCl<sub>3</sub>) δ 8.54 (s, 1H), 7.59 (s, 1H), 6.77 (d, *J* = 3.7 Hz, 1H), 6.69 (d, *J* = 2.6 Hz, 1H), 5.85 – 5.81 (m, 1H), 5.57 (t, *J* = 5.7 Hz, 1H), 4.60 – 4.56 (m, 1H), 4.50 (dd, *J* = 7.7, 3.3 Hz, 2H), 4.21 (s, 3H), 2.20 (s, 3H), 2.12 (s, 6H). <sup>13</sup>C NMR (126 MHz, CDCl<sub>3</sub>) δ 170.26, 169.52, 169.36, 161.78, 148.40,

141.68, 137.13, 108.85, 99.85, 90.45, 80.43, 74.28, 69.80, 62.58, 54.92, 29.69, 20.81, 20.48.

**2-(5-acetoxy-4-methoxy-7H-pyrrolo[2,3-*d*]pyrimidin-7-yl)-5-(acetoxymethyl)tetrahydrofuran-3,4-diyl diacetate (7)**

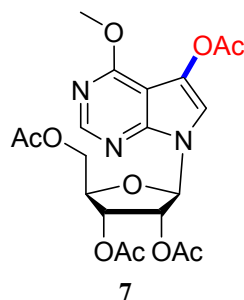

Colorless oil (63% yield). <sup>1</sup>H NMR (500 MHz, CDCl<sub>3</sub>) 8.58 (s, 1H), 7.58 (s, 1H), 6.71 (s, 1H), 5.76 (dd, *J* = 5.4, 3.8 Hz, 1H), 5.53 (q, *J* = 5.9 Hz, 1H), 4.60 (dt, *J* = 6.3, 3.2 Hz, 1H), 4.51 – 4.47 (m, 2H), 4.24 (s, 3H), 2.20 (s, 3H), 2.13 (d, *J* = 2.3 Hz, 6H), 2.10 (d, *J* = 2.9 Hz, 3H). <sup>13</sup>C NMR (126 MHz, CDCl<sub>3</sub>) δ 170.21, 169.55, 169.49, 162.61, 138.33, 109.75, 90.51, 80.58, 74.22, 69.59, 62.44, 60.45, 60.41, 55.15, 21.05, 20.82, 20.50, 20.48, 14.20, 1.02. HRMS-ESI calculated for C<sub>20</sub>H<sub>23</sub>N<sub>3</sub>O<sub>10</sub> [M+Na]<sup>+</sup> 488.1276, found 488.1283.

**1-(4-phenyl-7H-pyrrolo[2,3-*d*]pyrimidin-7-yl)ethan-1-one (1gg)**

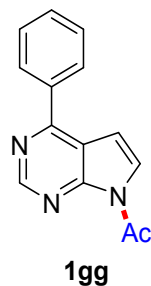

White solid (85% yield). MP: 146-148°C. <sup>1</sup>H NMR (500 MHz, CDCl<sub>3</sub>) δ 9.06 (s, 1H), 8.05 (dd, *J* = 5.6, 2.9 Hz, 3H), 7.56 (ddt, *J* = 7.0, 5.2, 3.6 Hz, 3H), 6.95 (d, *J* = 4.1 Hz, 1H), 3.11 (s, 3H). <sup>13</sup>C NMR (126 MHz, CDCl<sub>3</sub>) δ 168.62, 158.51, 152.68, 152.68, 137.30, 130.44, 128.92, 128.83, 125.96, 118.47, 104.90, 25.93. HRMS-ESI calculated for C<sub>14</sub>H<sub>11</sub>N<sub>3</sub>O [M+H]<sup>+</sup> 238.0975, found 238.0975.

## 5. NMR Spectra of Compounds

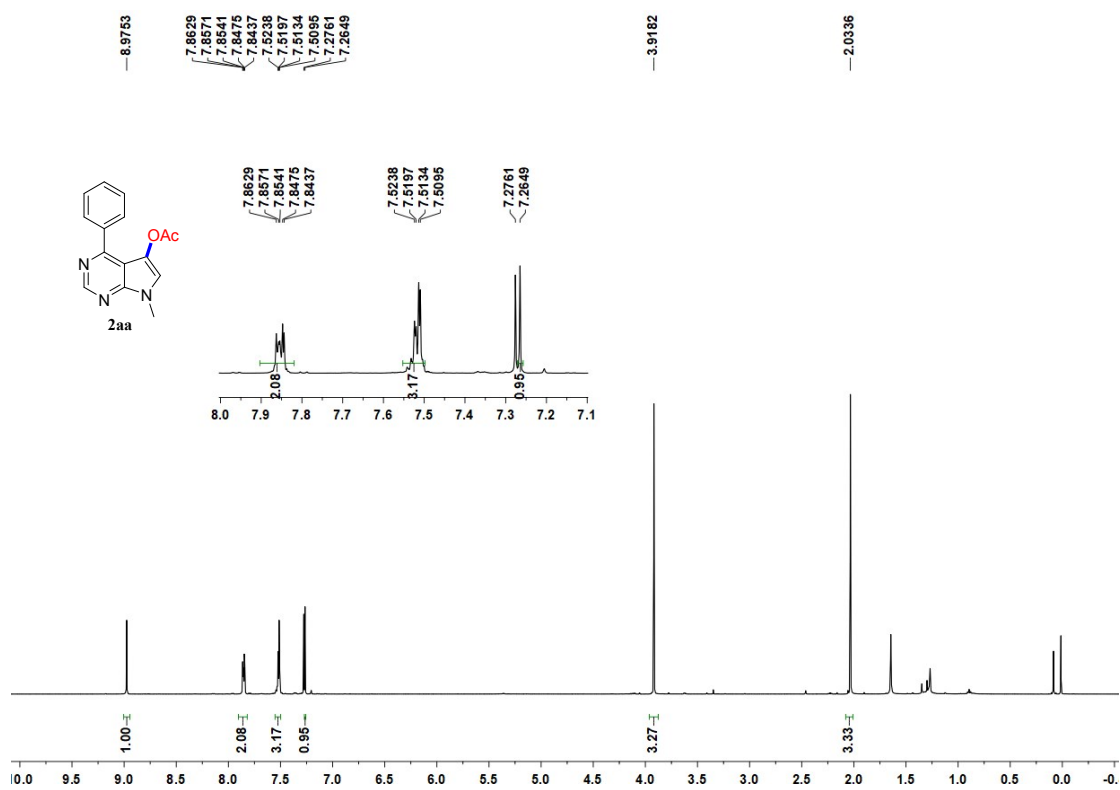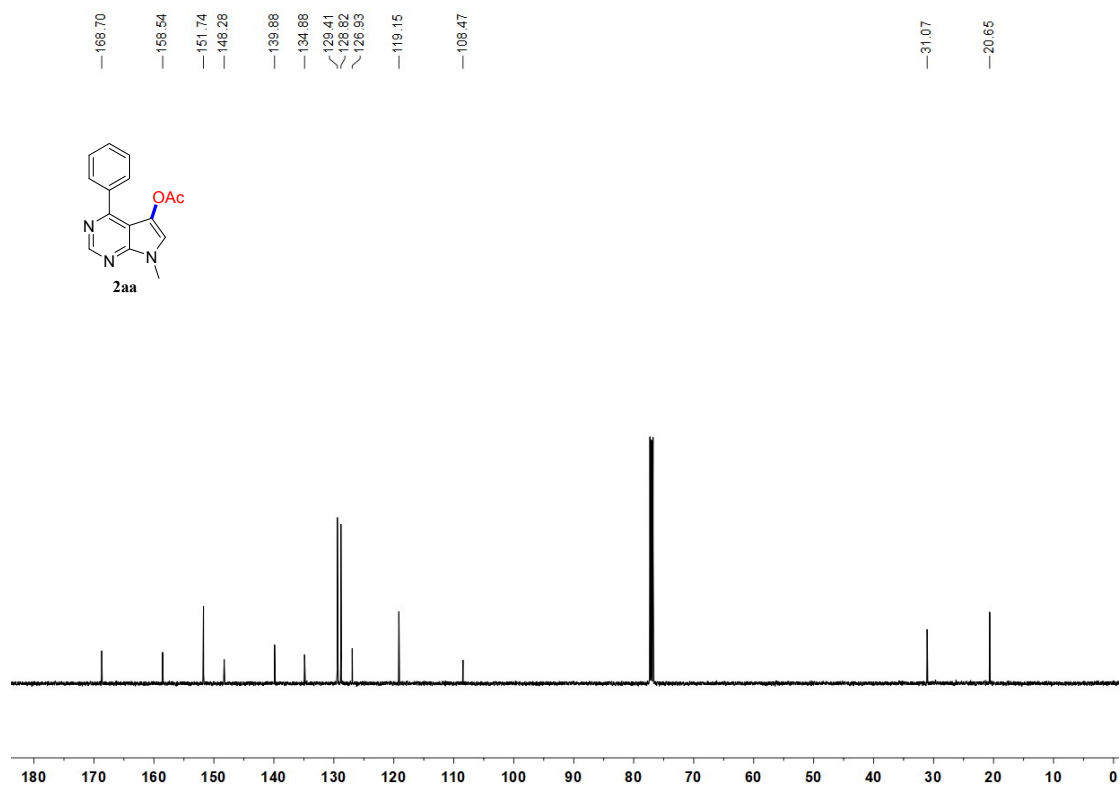

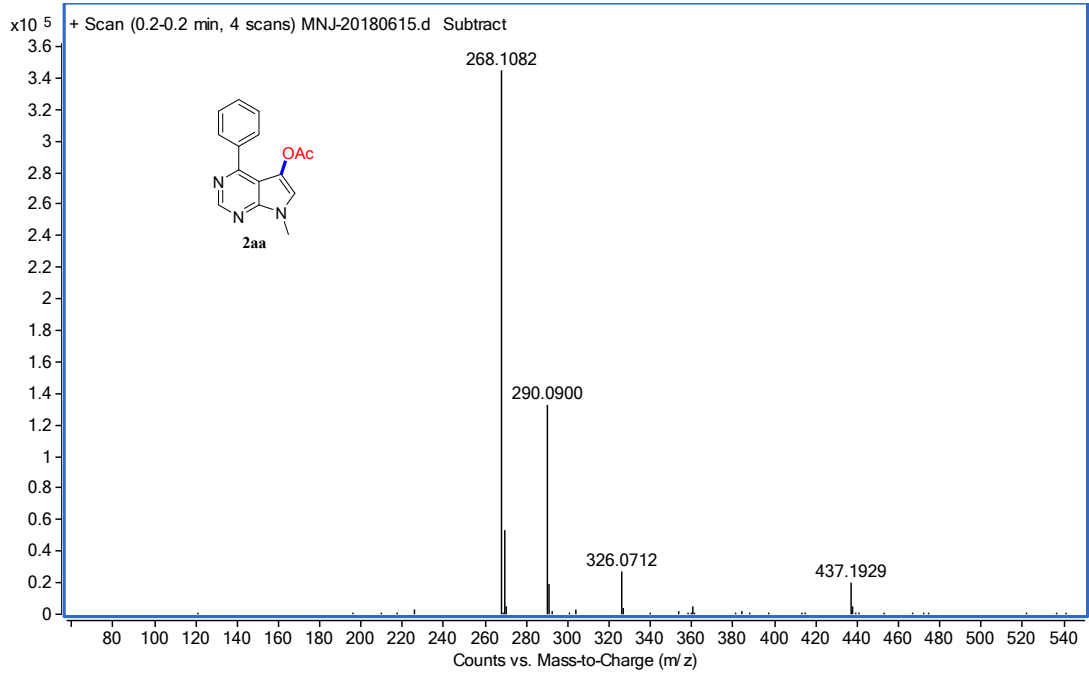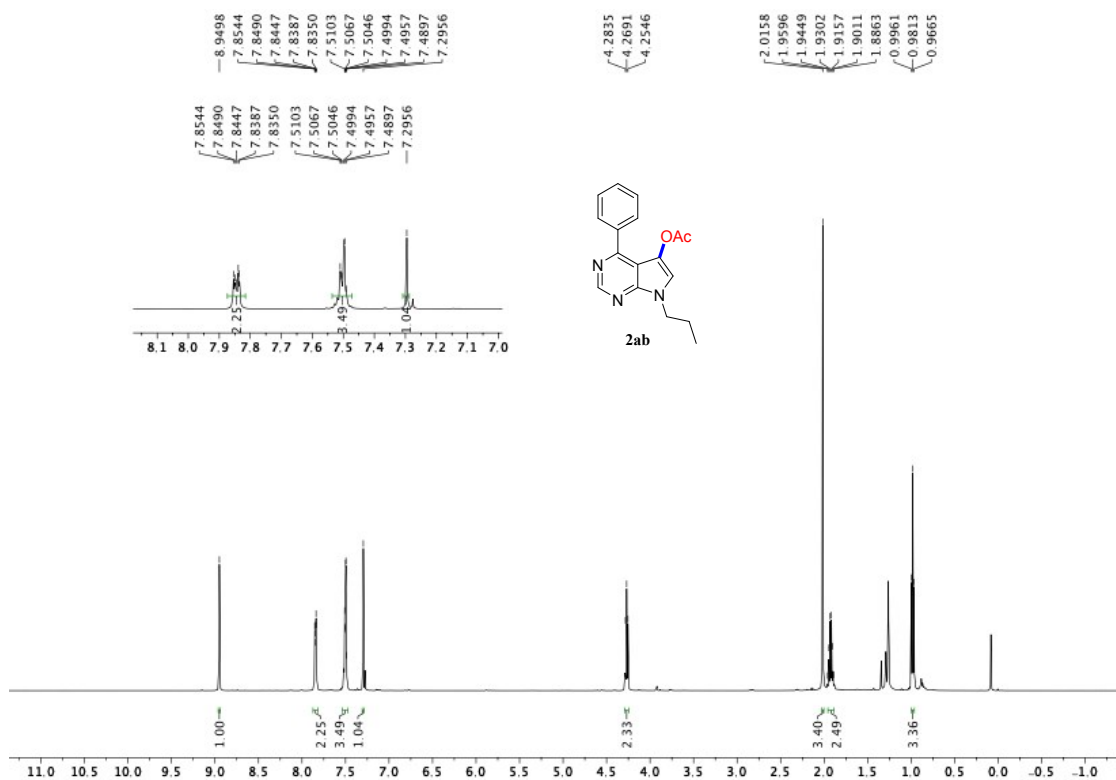



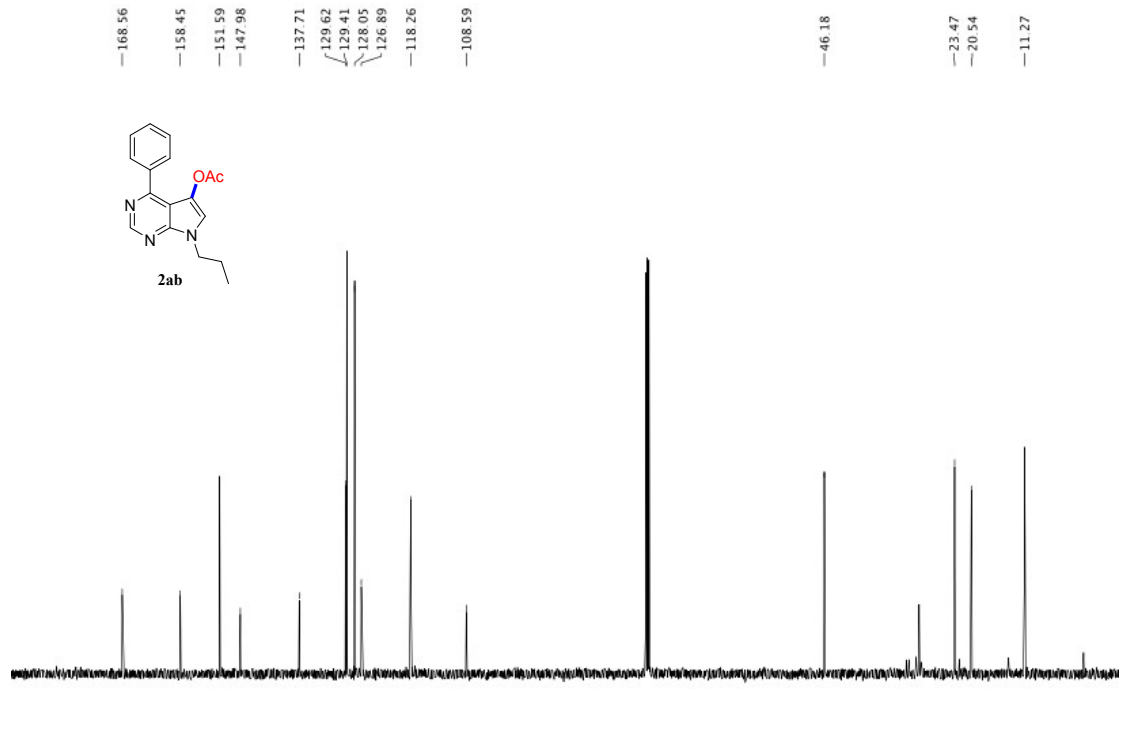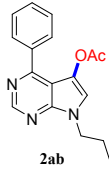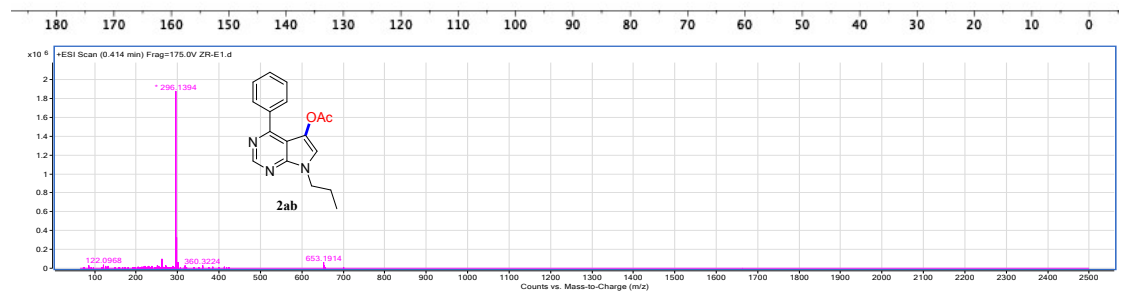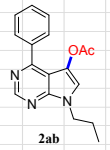

- 9.0041
- 7.8846
- 7.8781
- 7.8736
- 7.8681
- 7.8645
- 7.8581
- 7.8542
- 7.8477
- 7.8412
- 7.8381
- 7.8317
- 7.8292
- 7.8229
- 7.8188
- 7.8125
- 7.8087
- 7.8030
- 7.7995
- 7.7956
- 7.7918
- 7.7886
- 7.7830
- 7.7586
- 7.7550
- 7.7470
- 7.7434
- 7.7339
- 7.7302
- 7.7269
- 7.7216
- 7.7163
- 7.7052
- 7.7015
- 7.6920
- 7.6887
- 7.6861
- 7.6762
- 7.6549
- 5.5042
- 1.9916

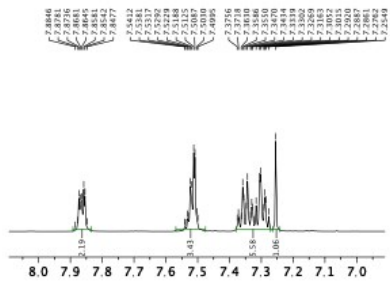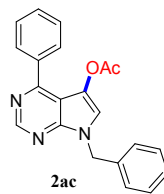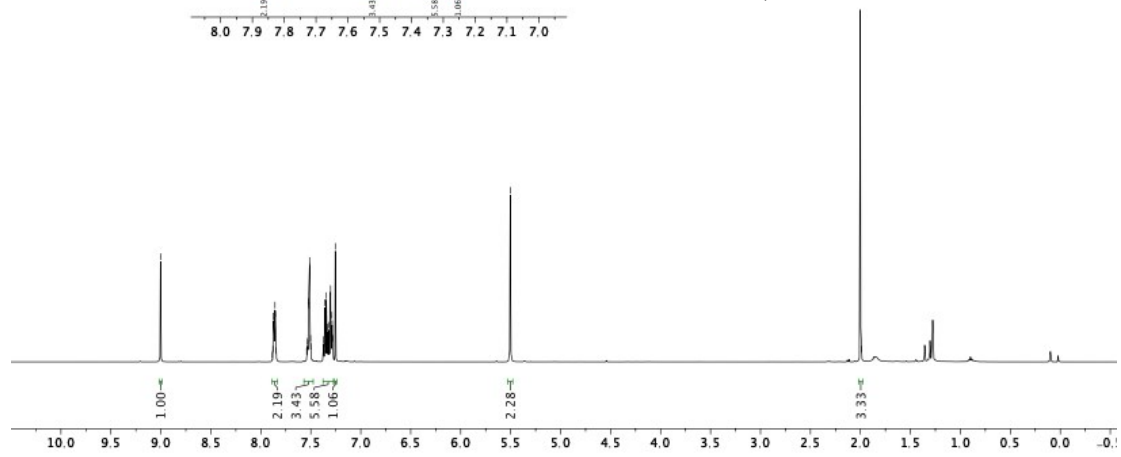

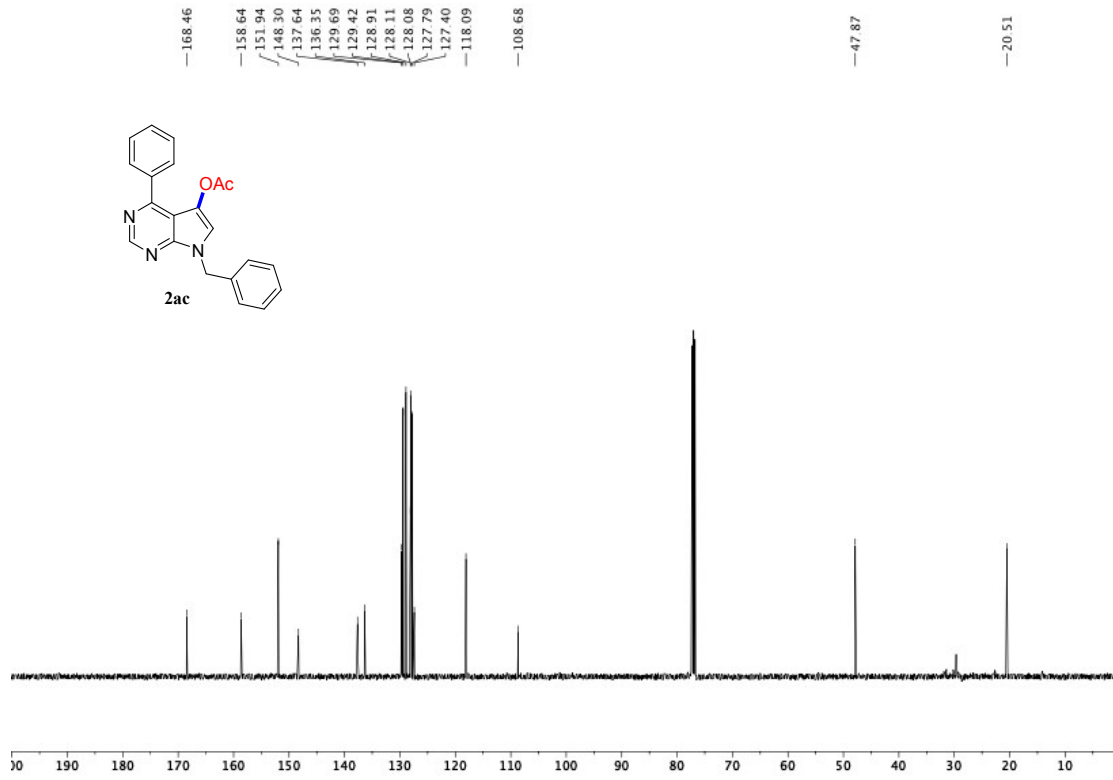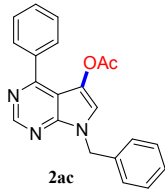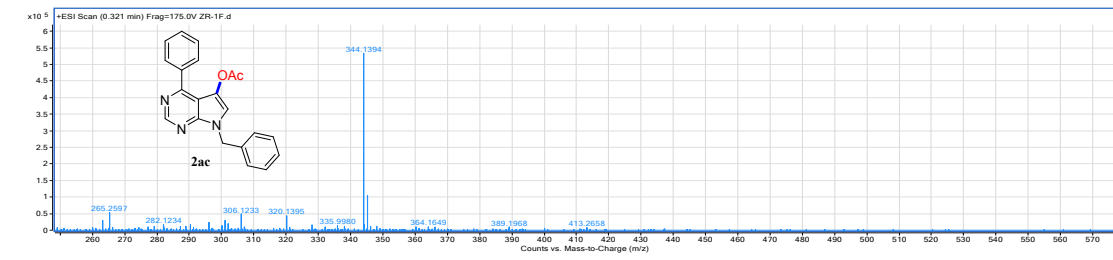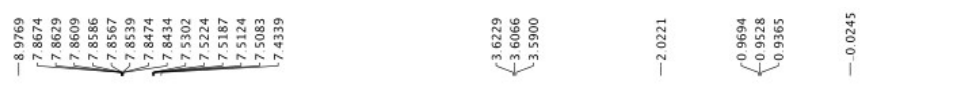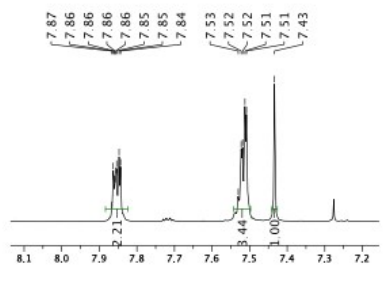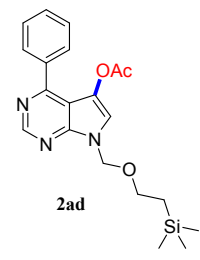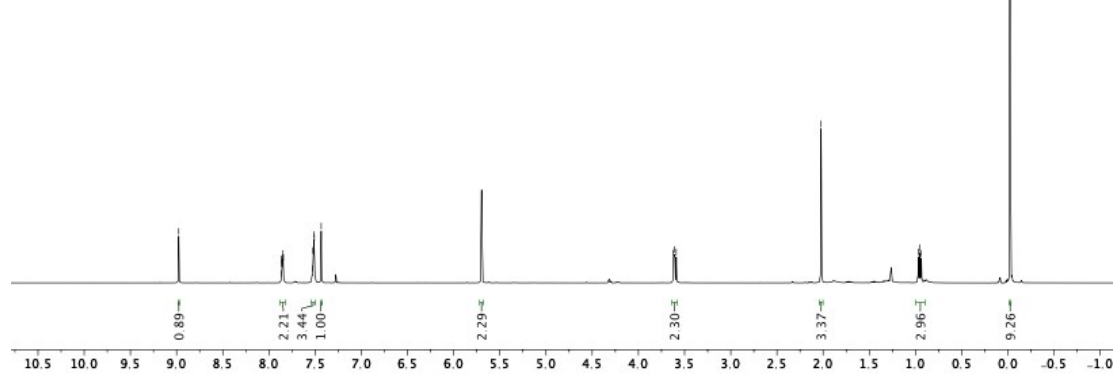

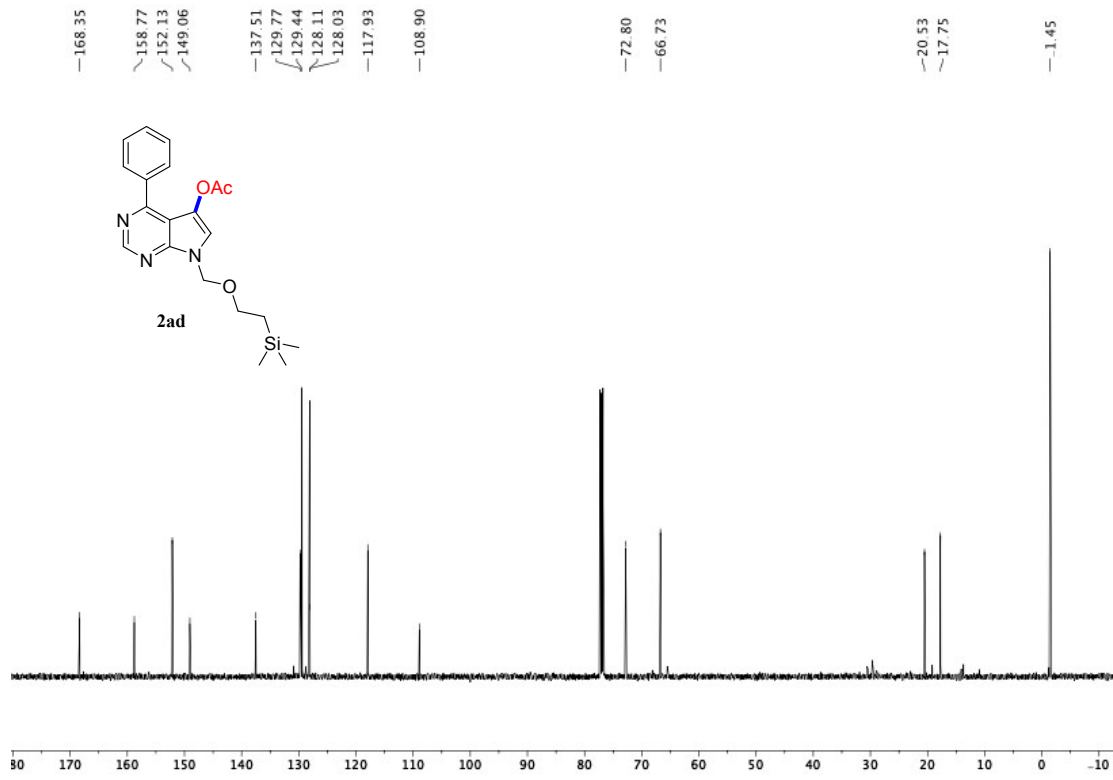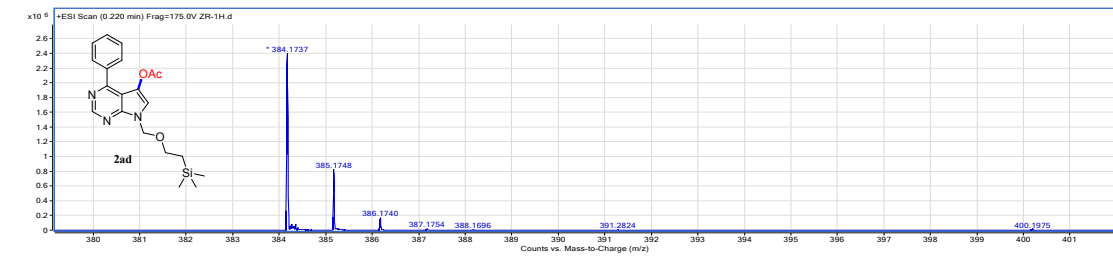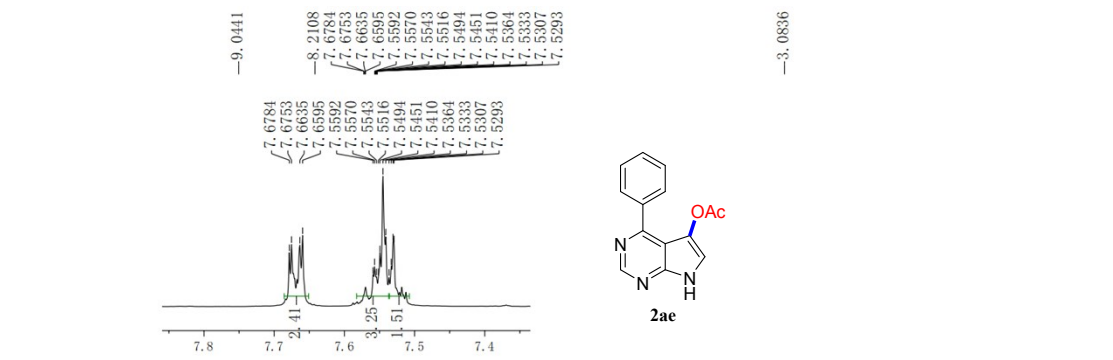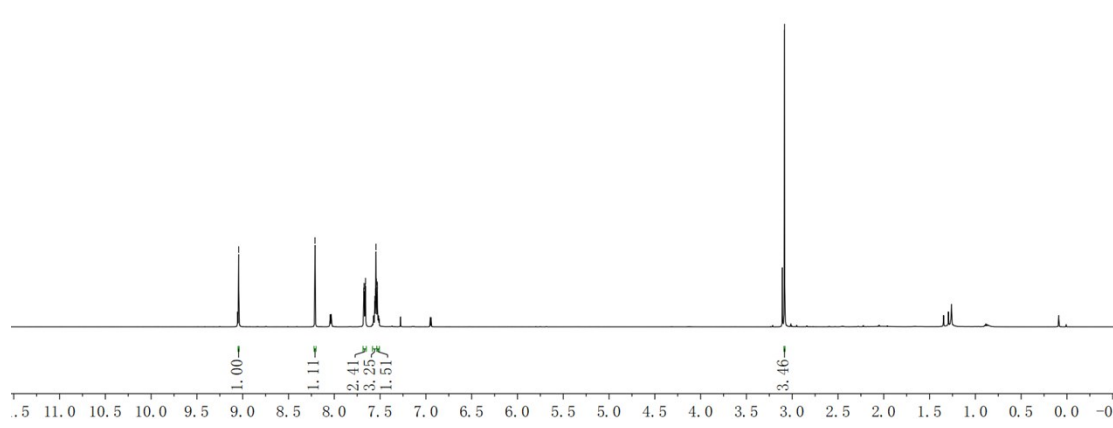

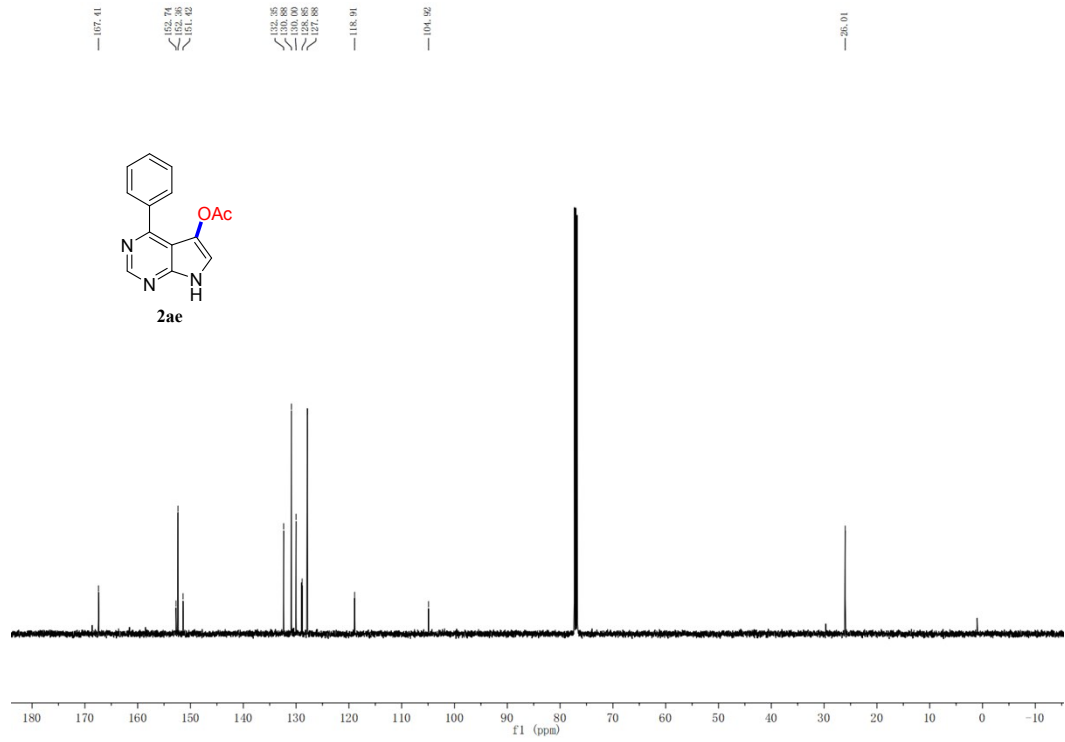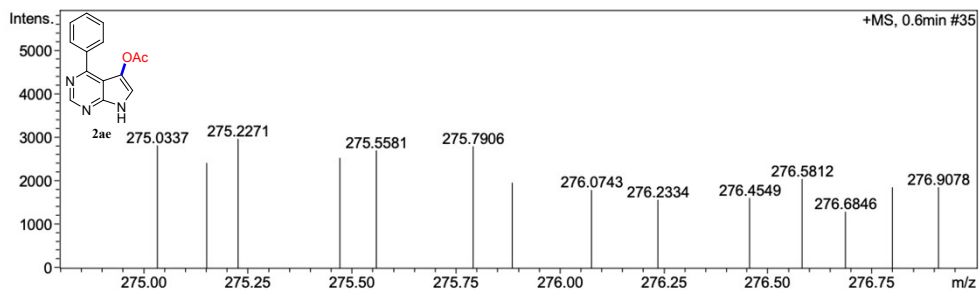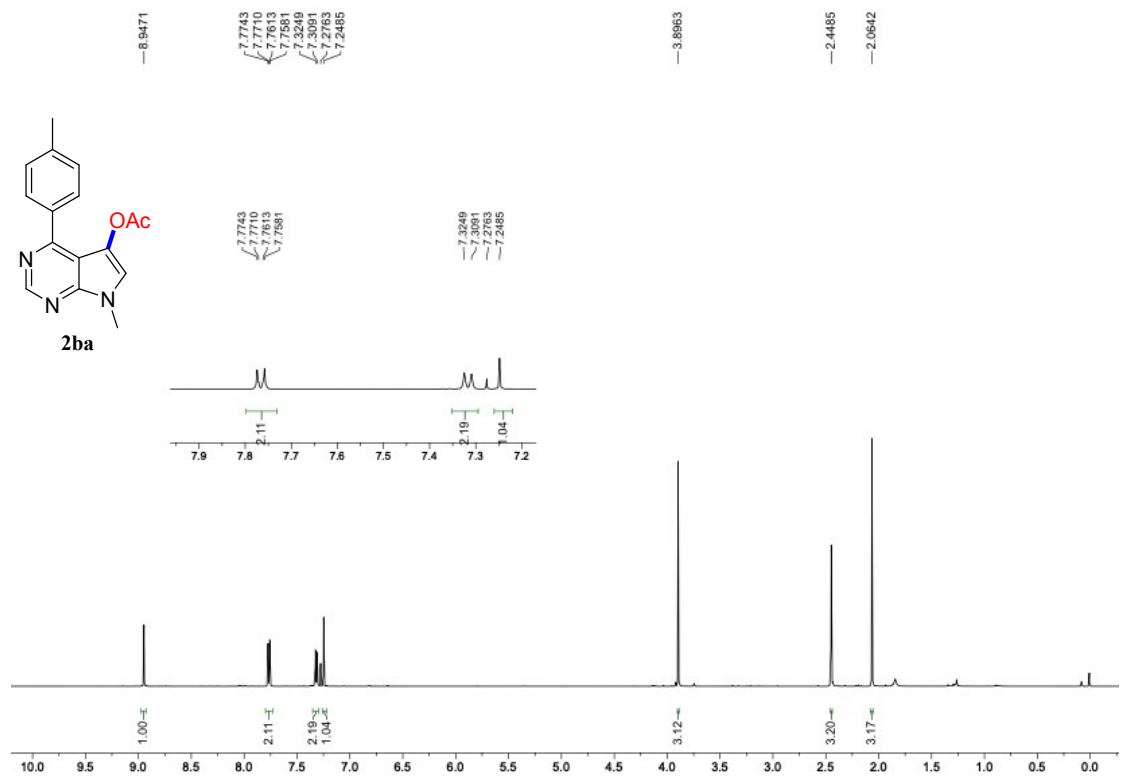

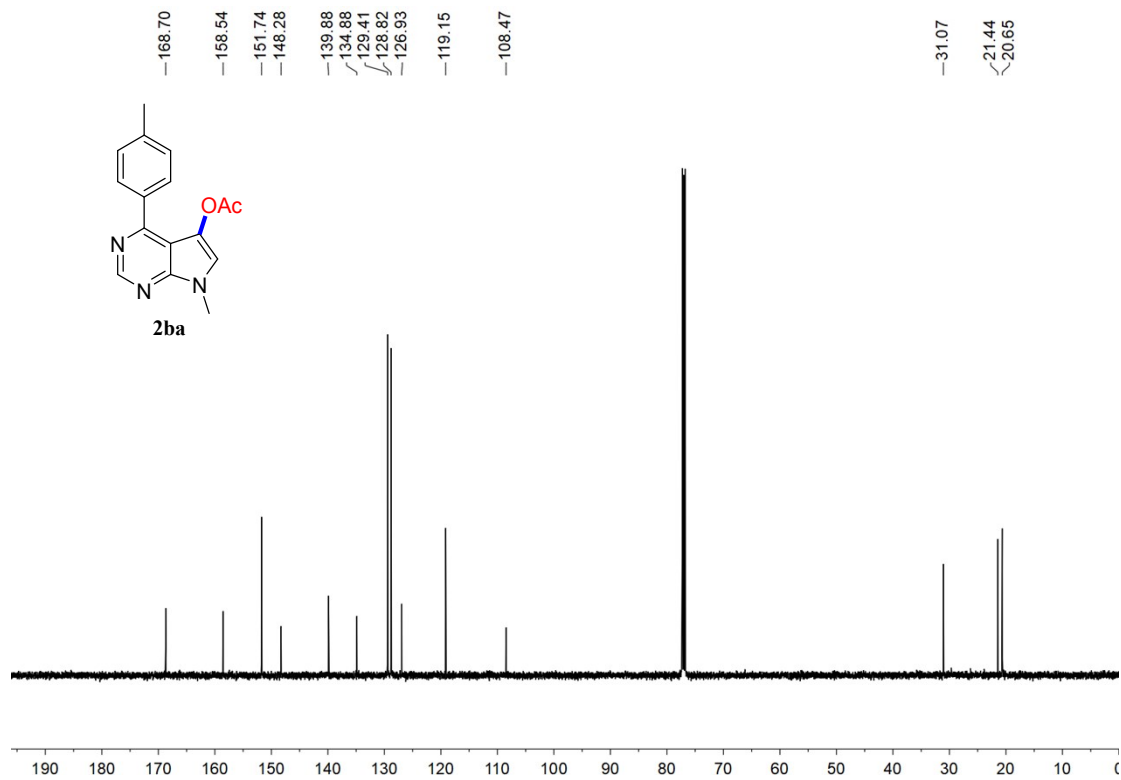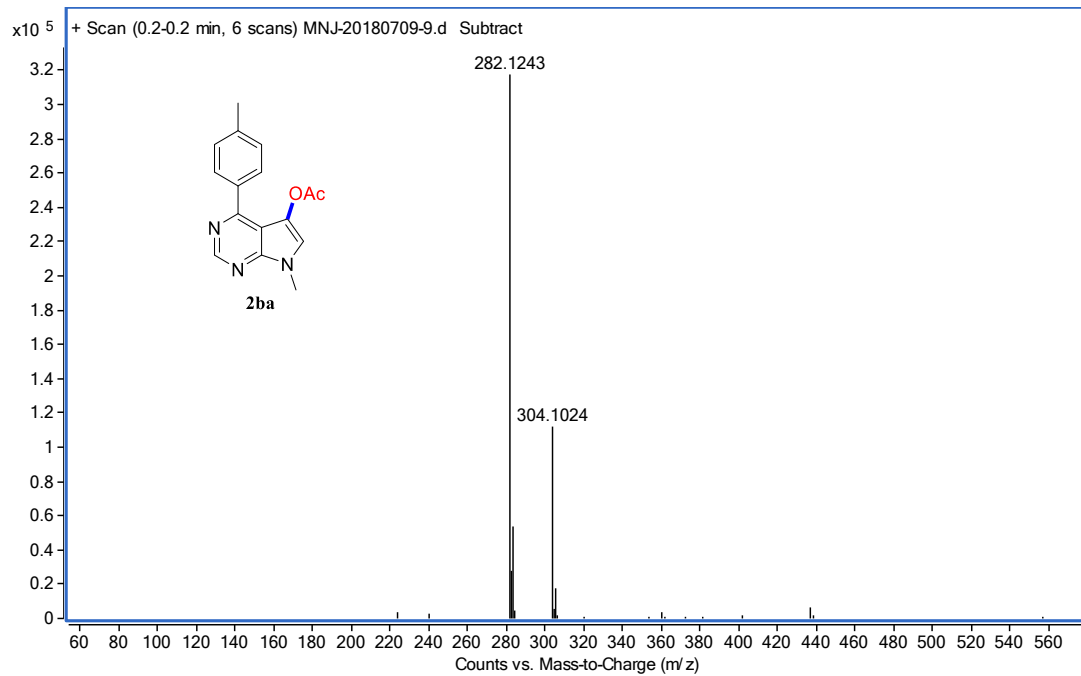

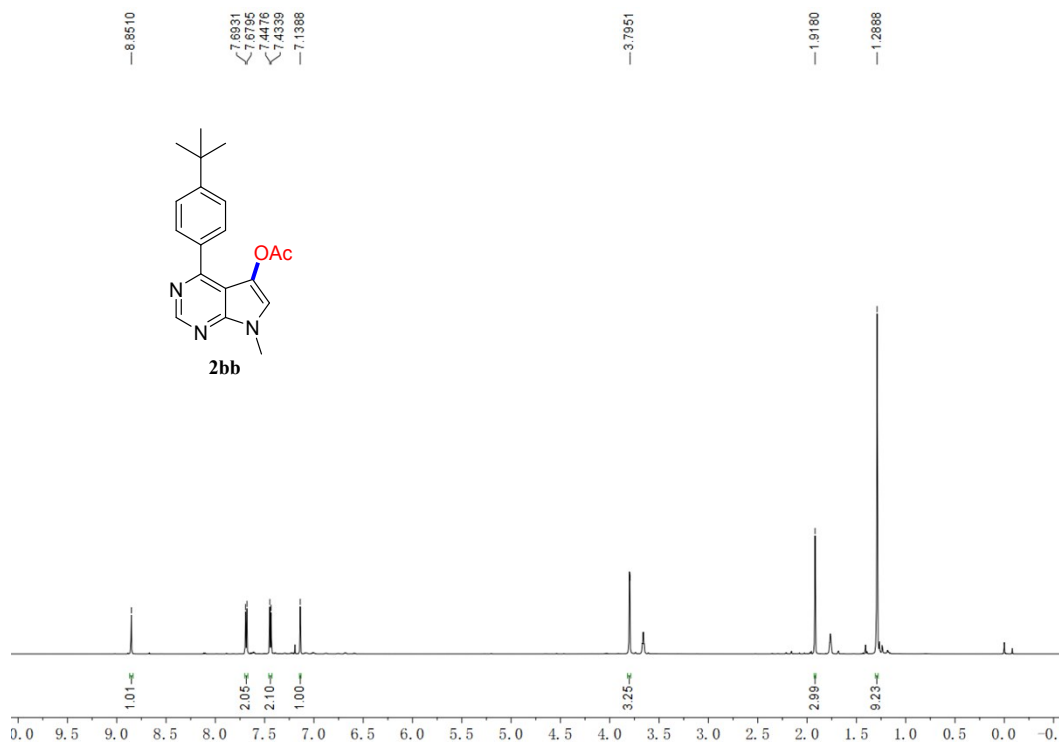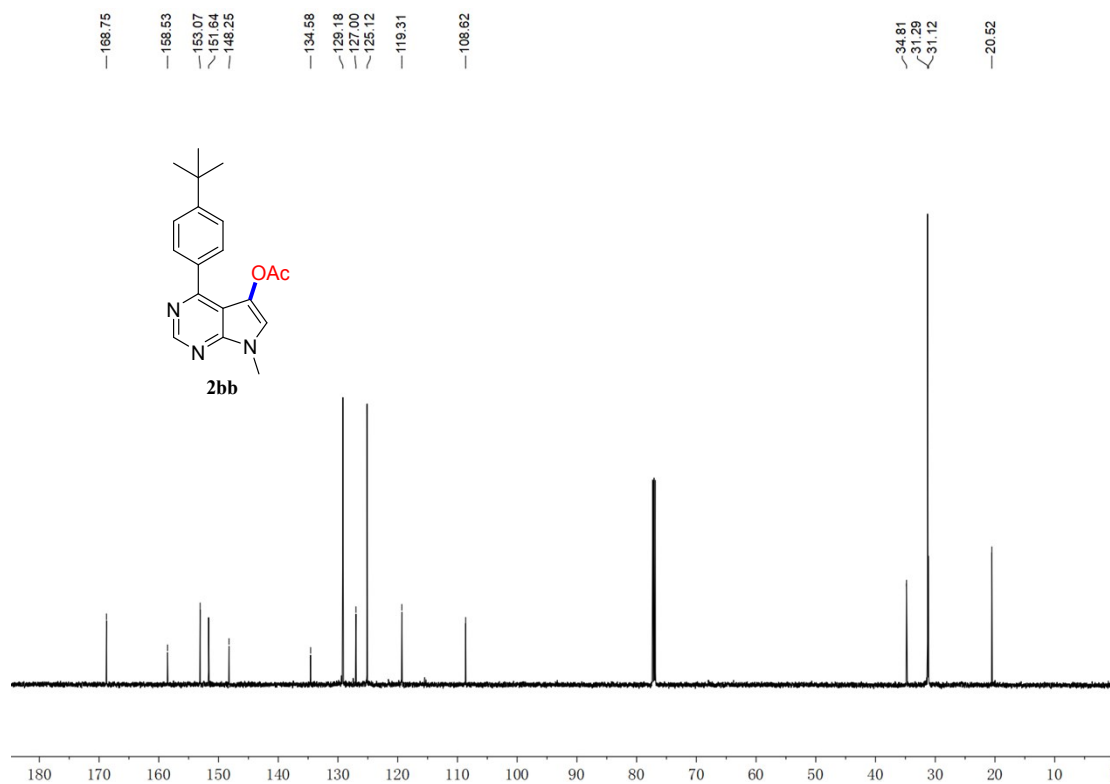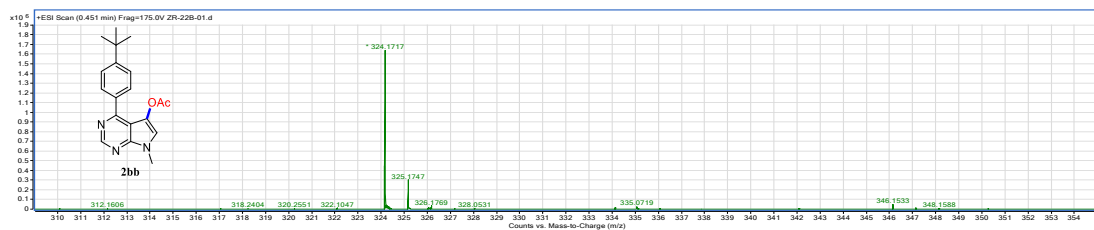

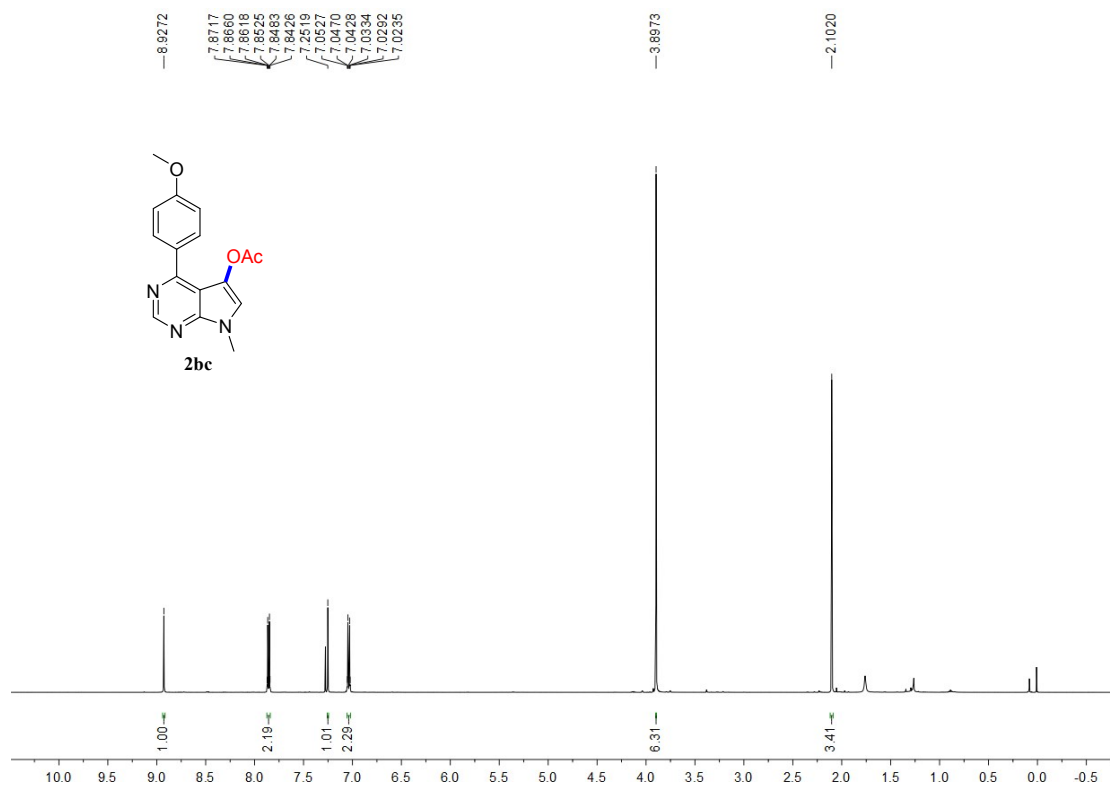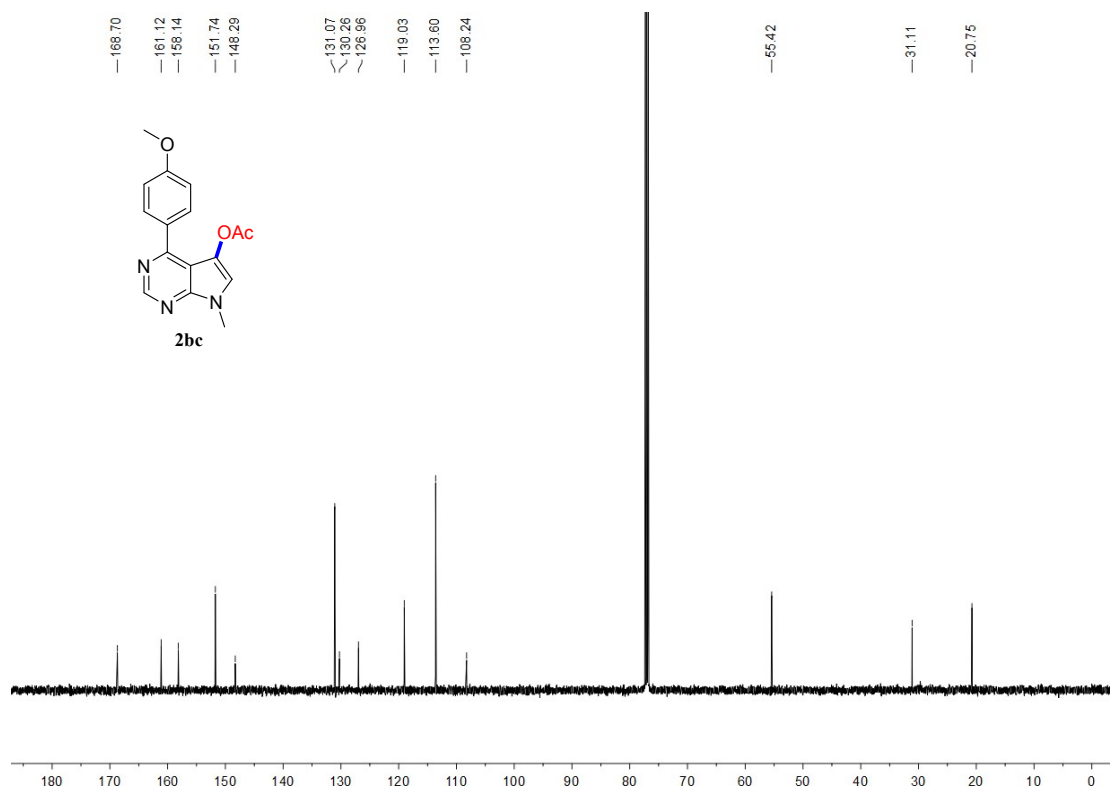

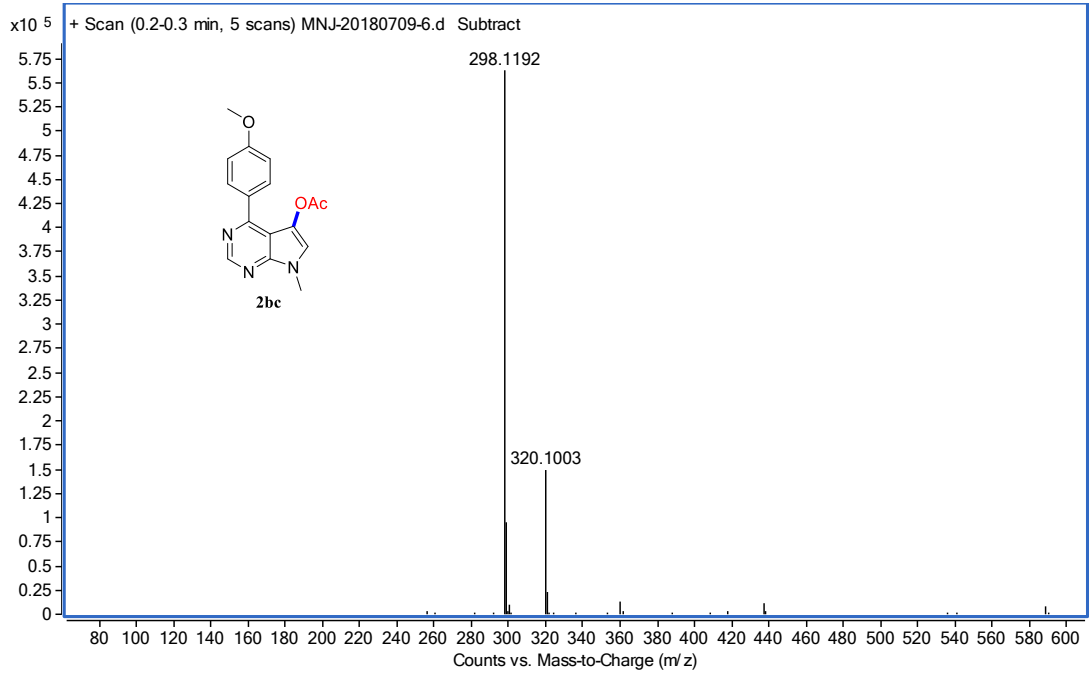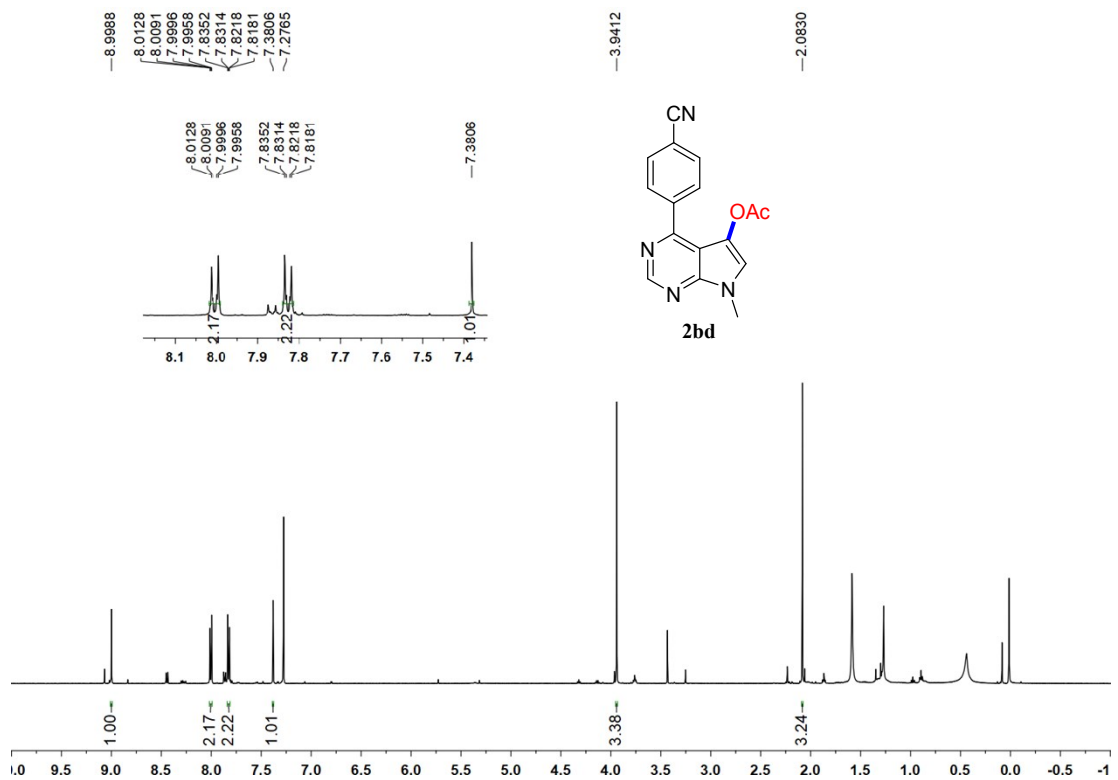



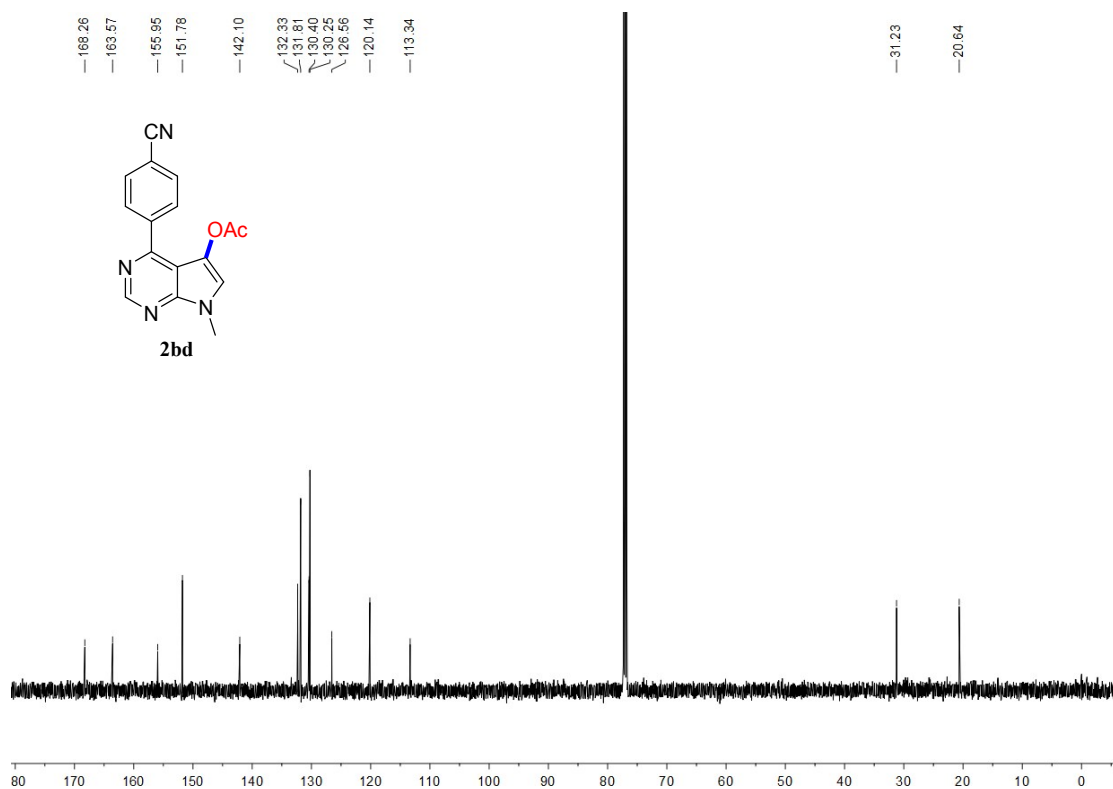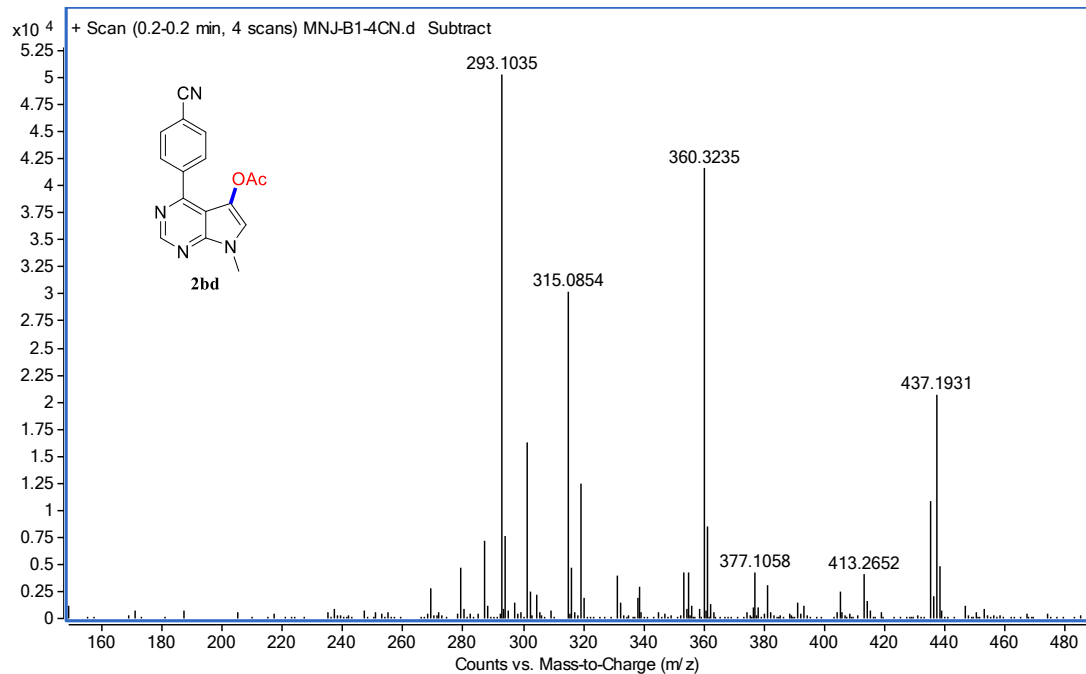

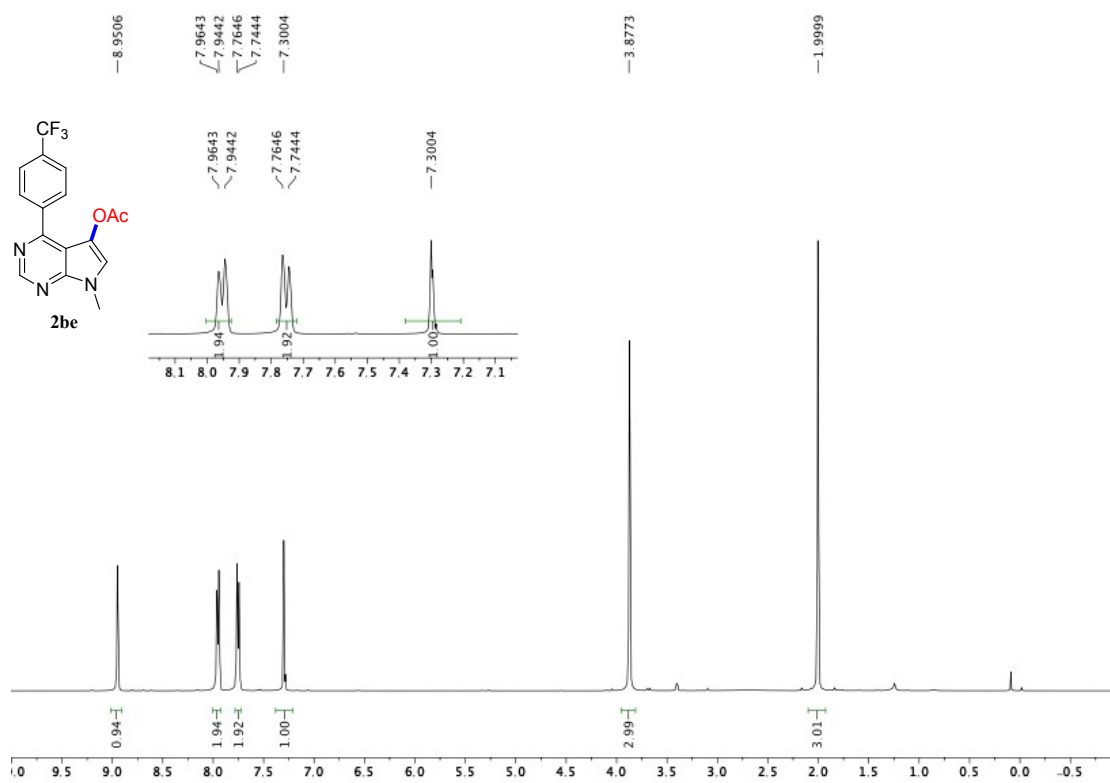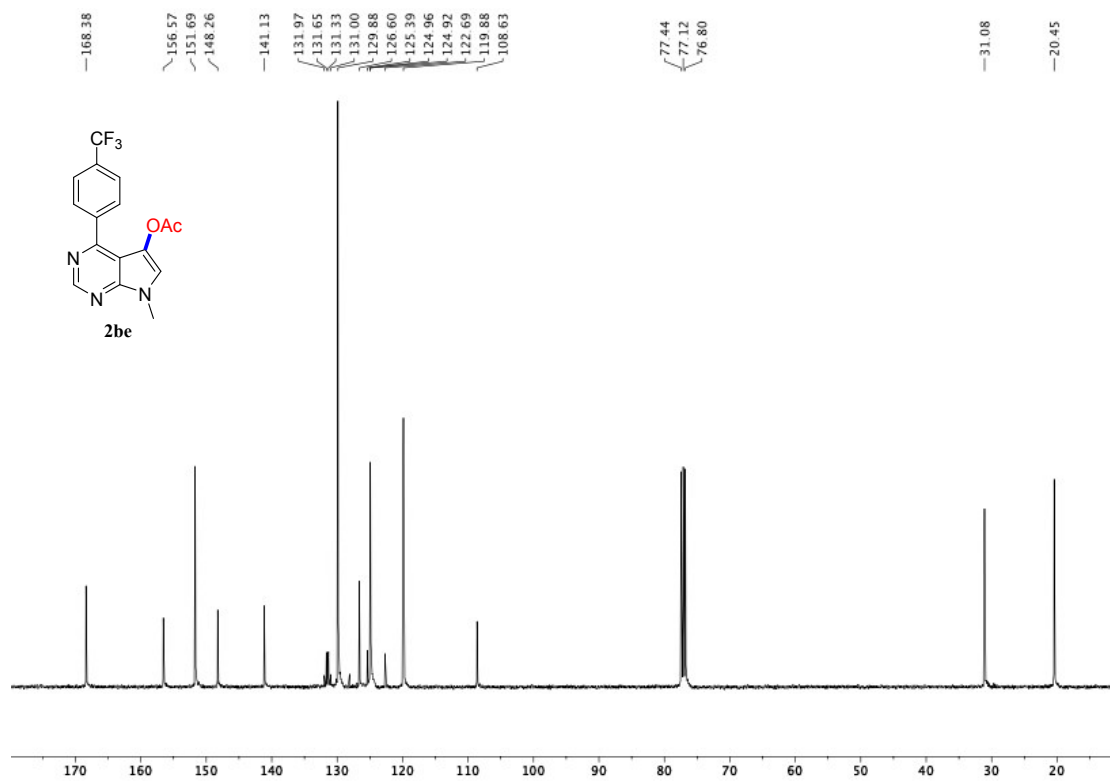

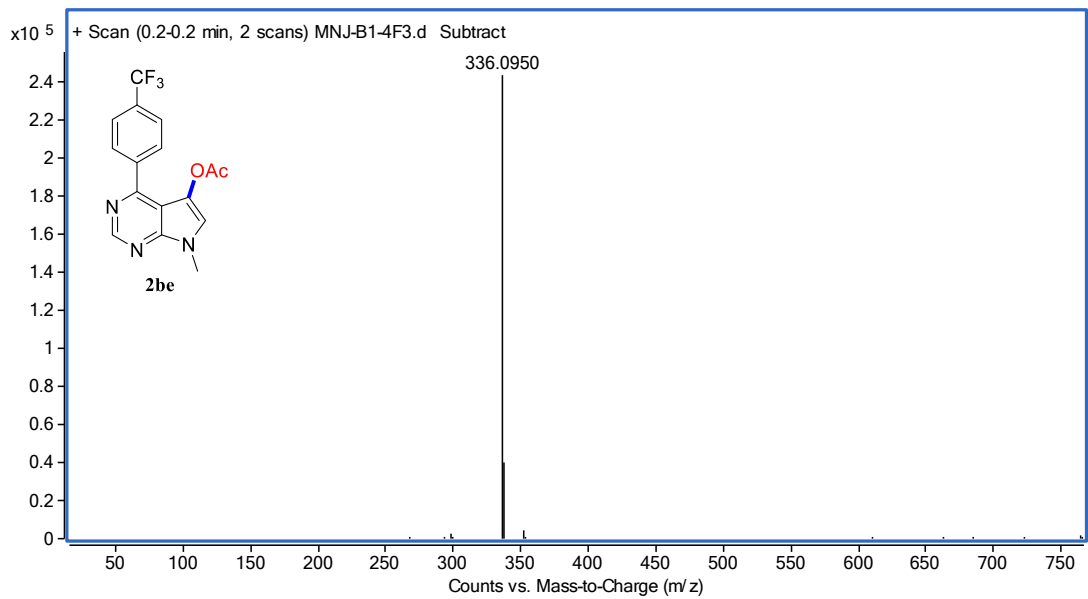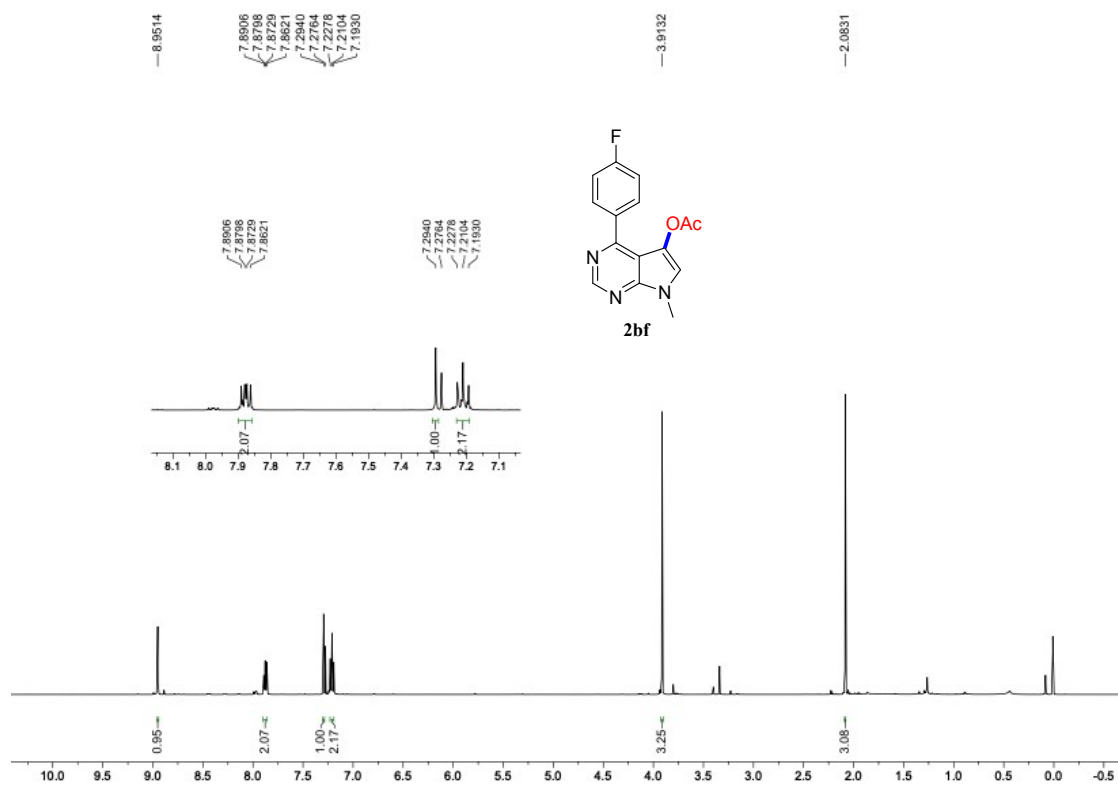

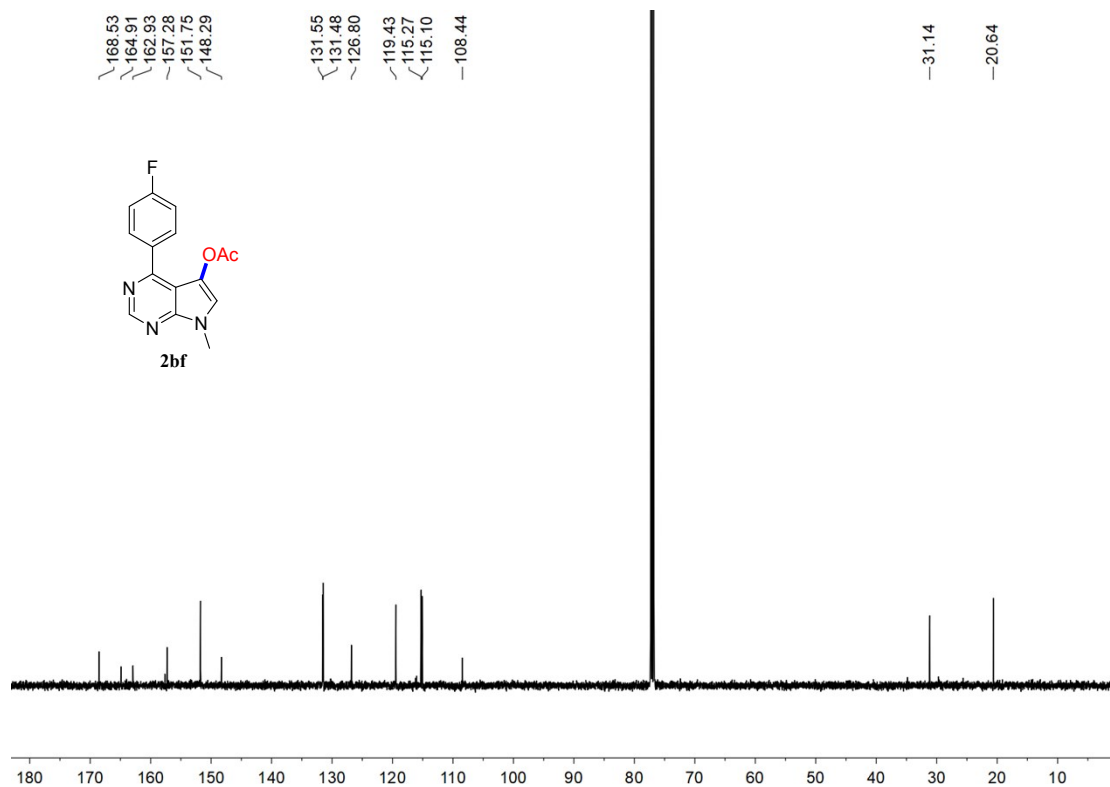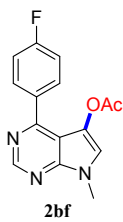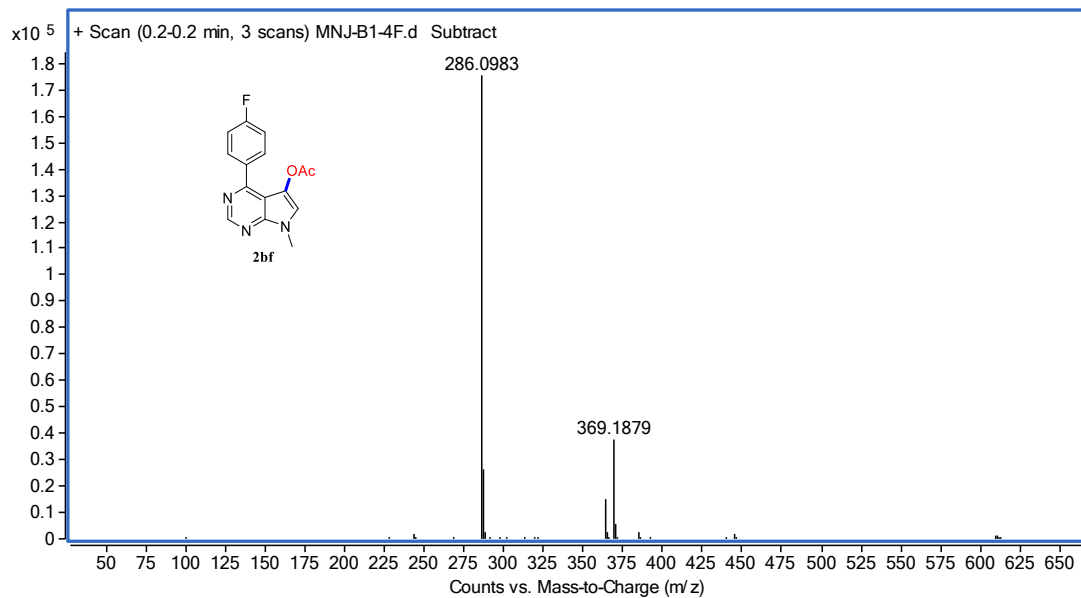

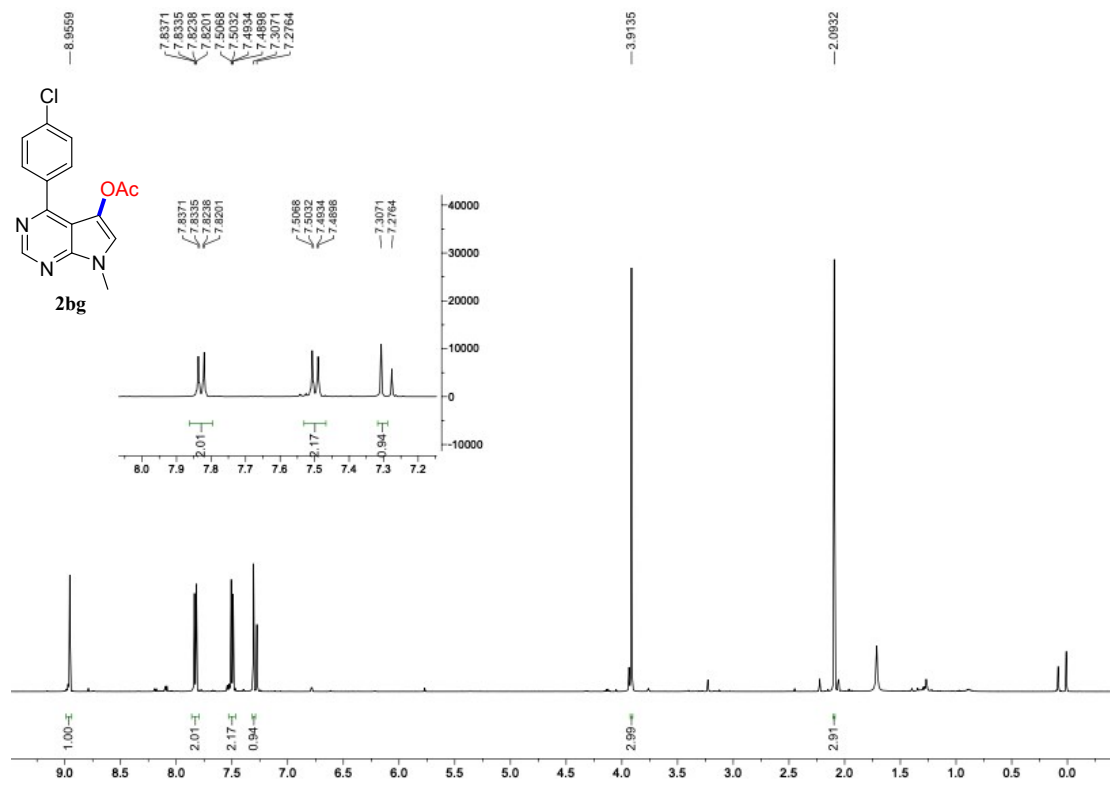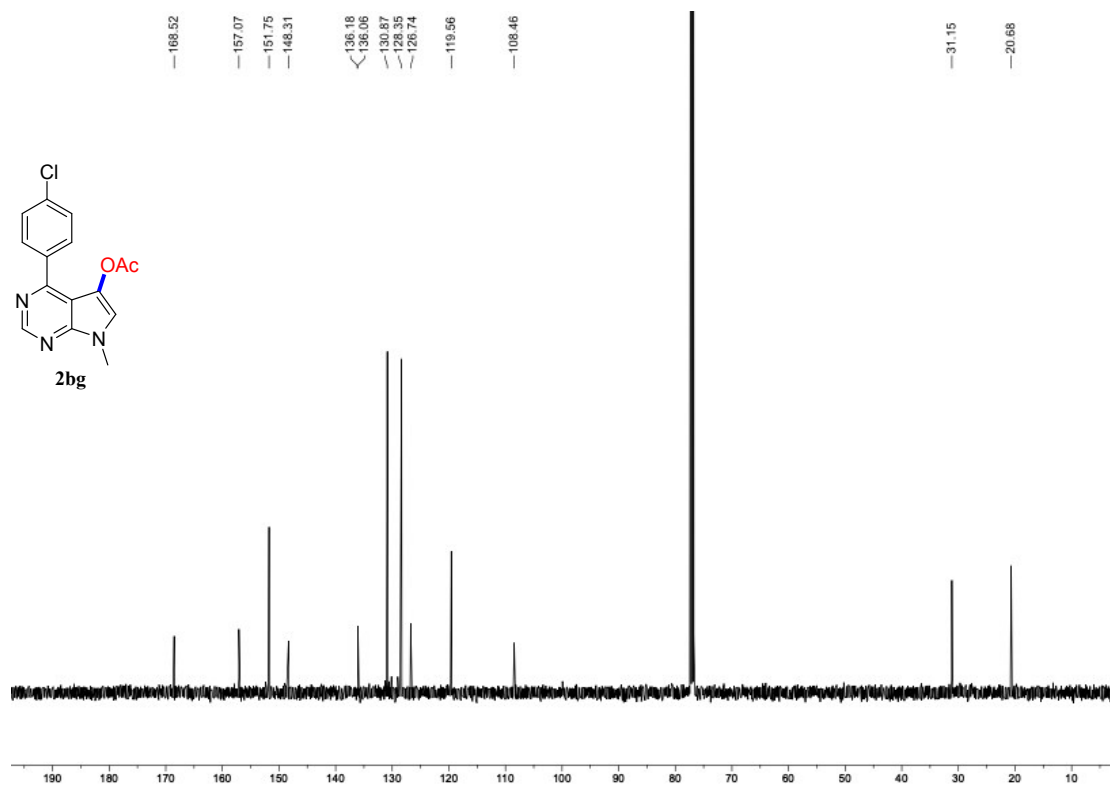

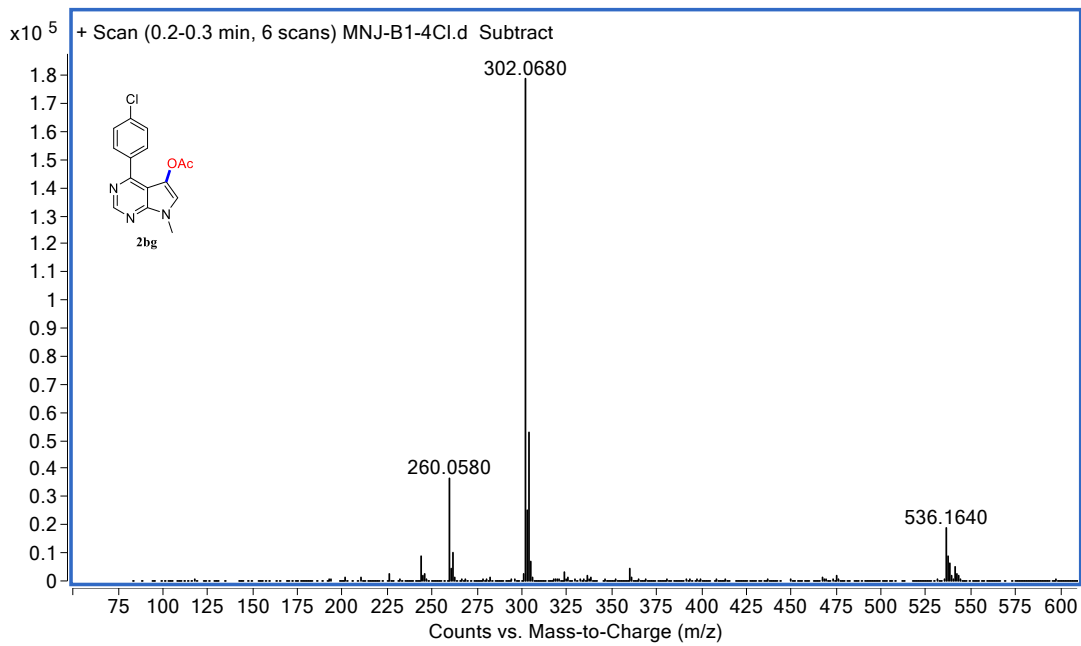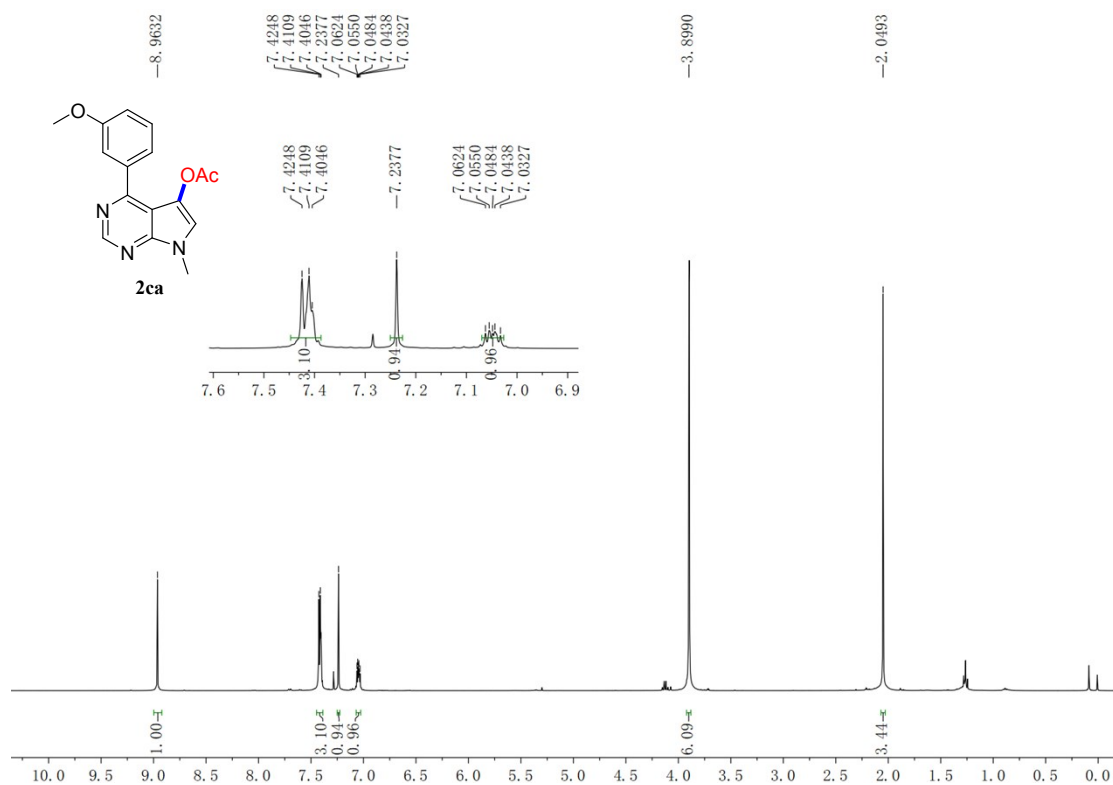

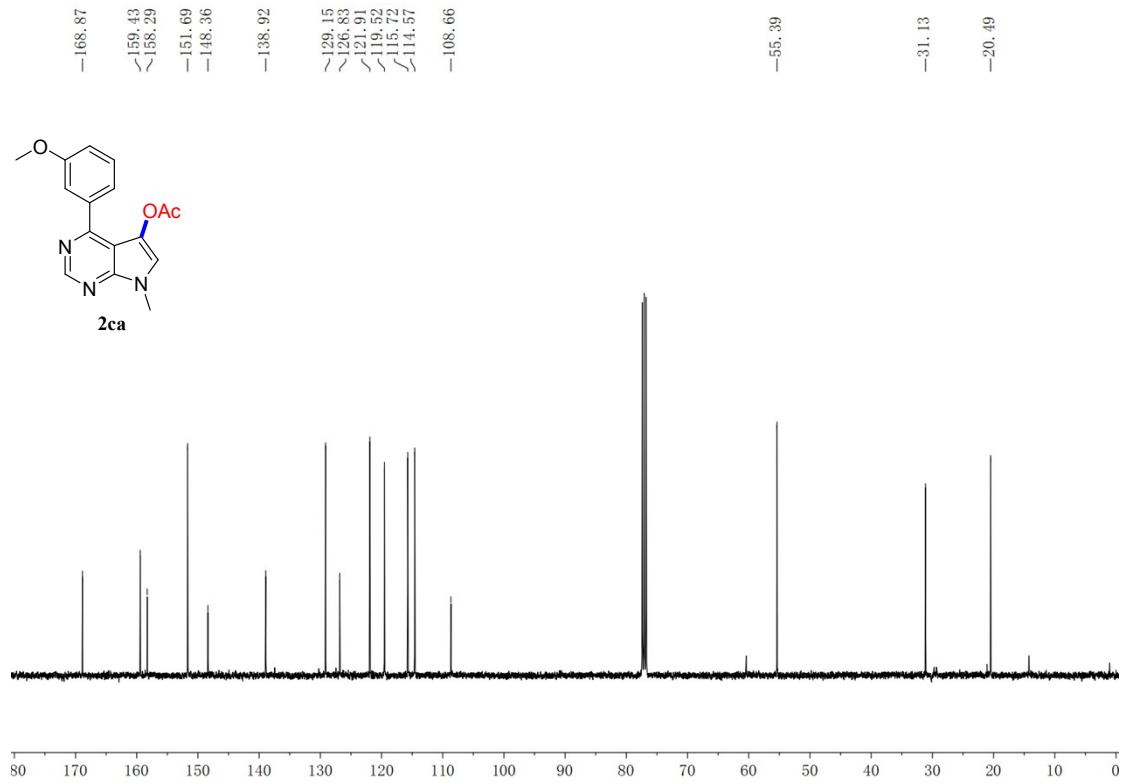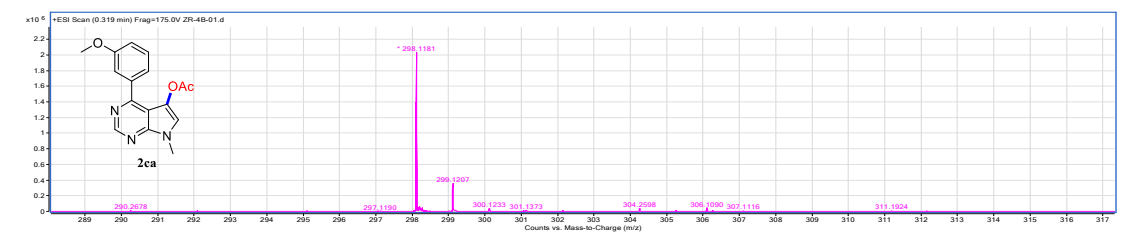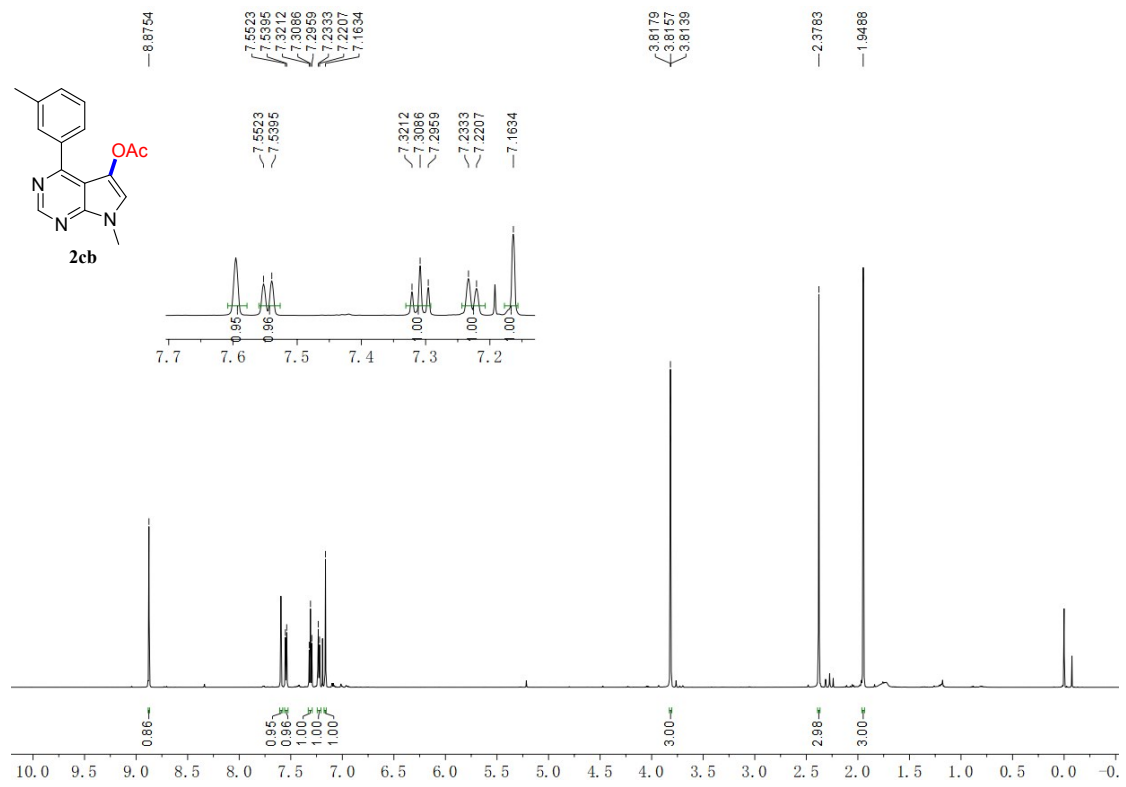

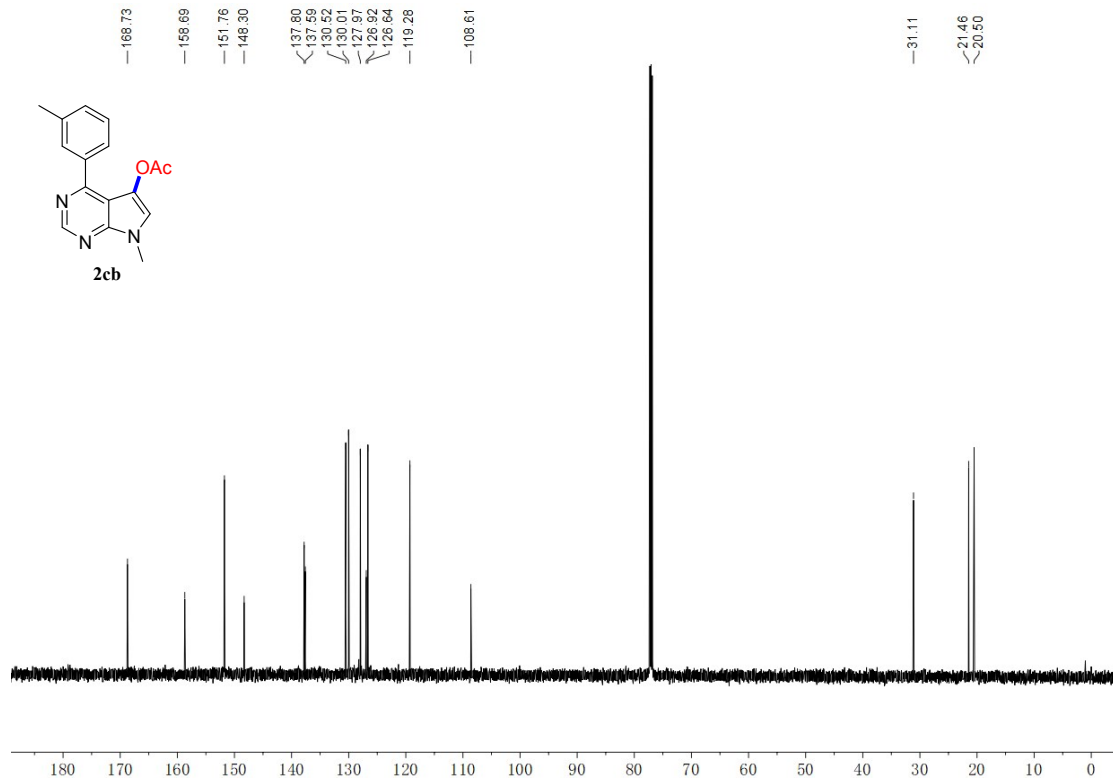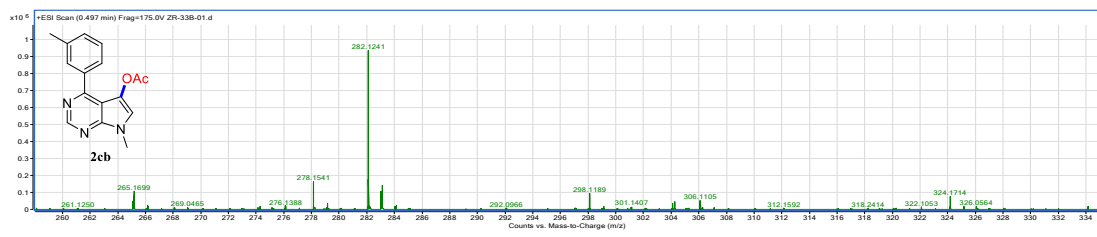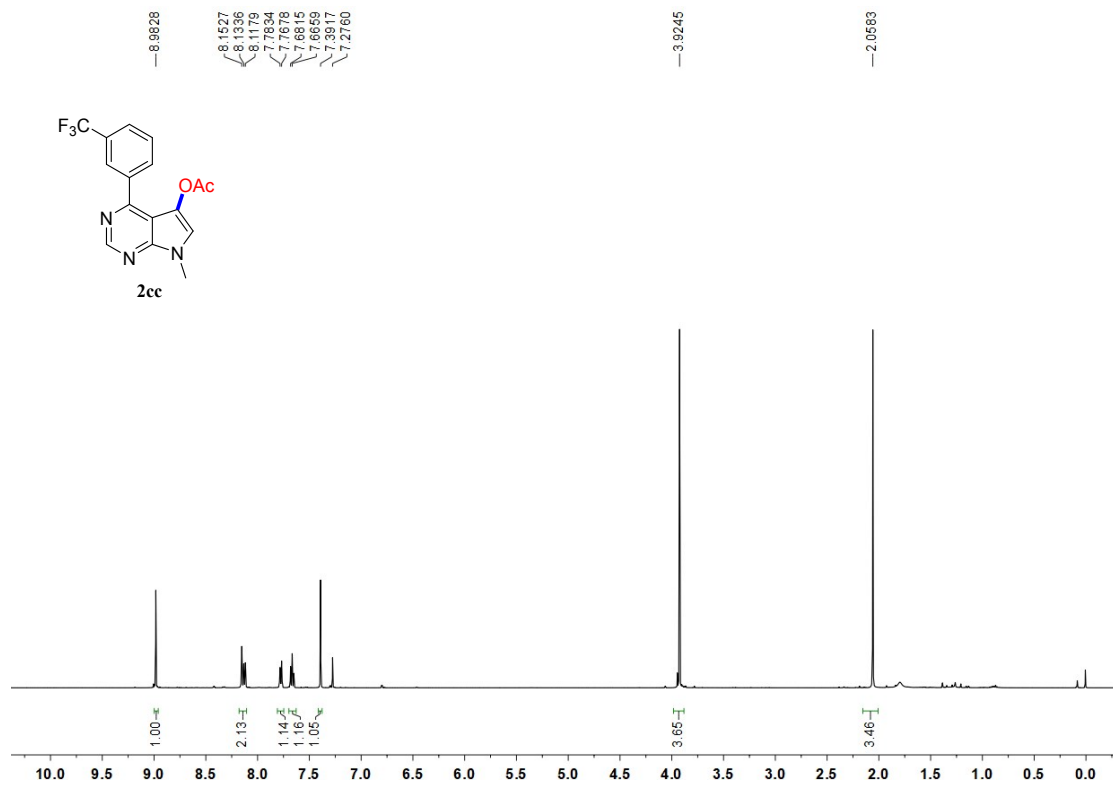



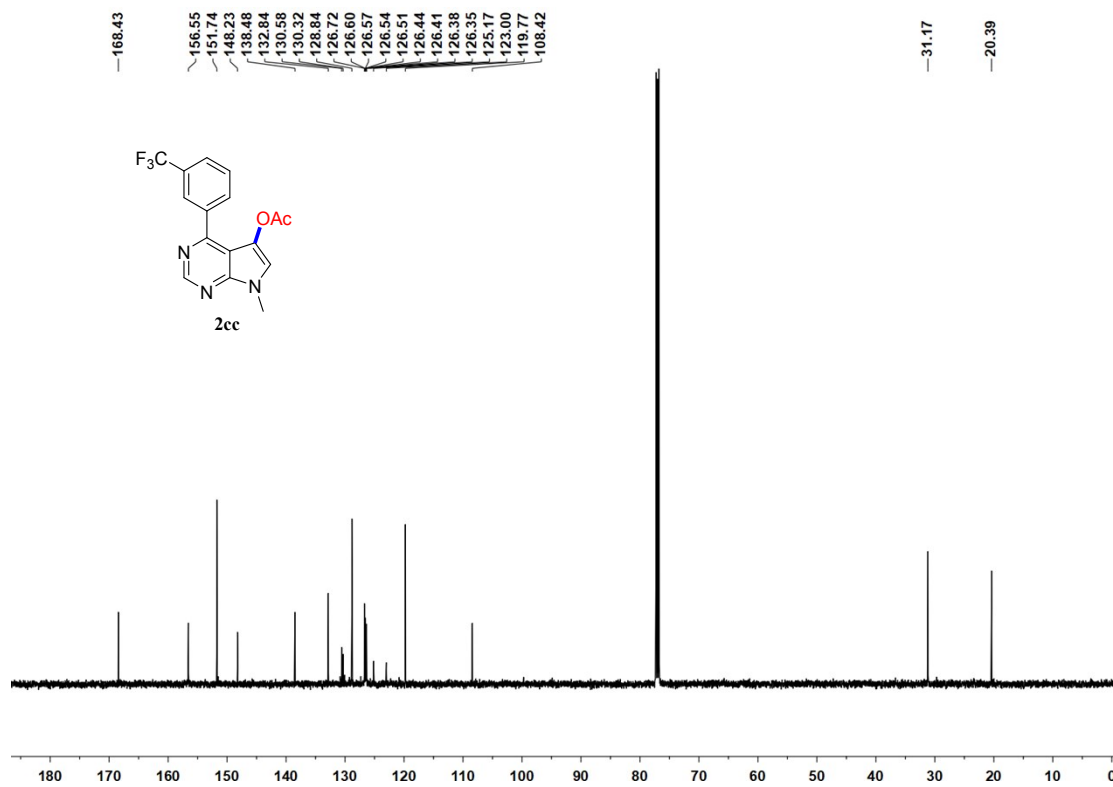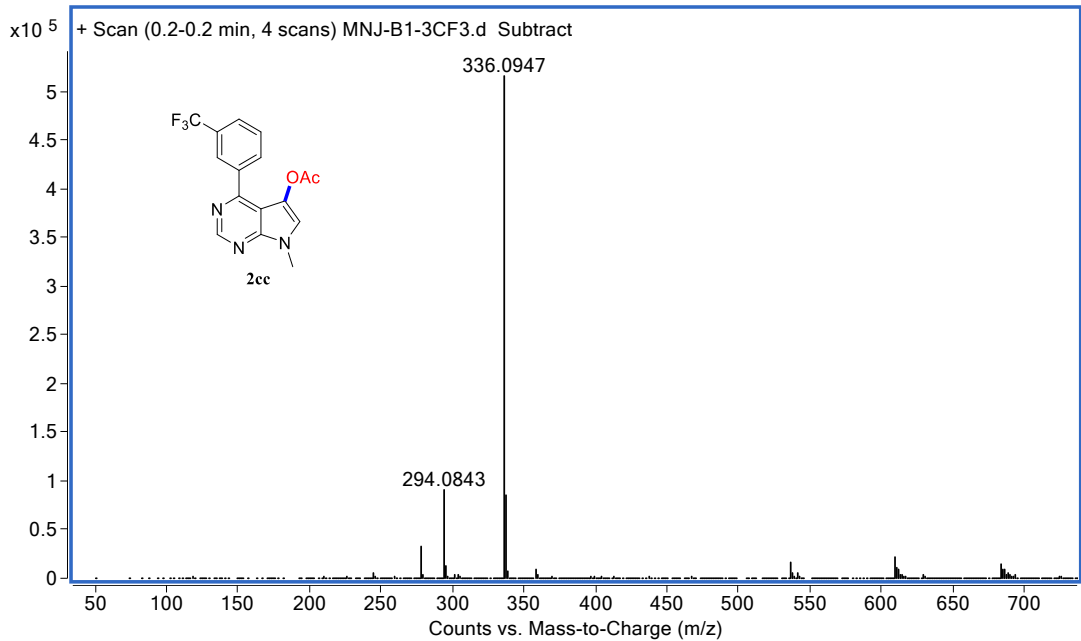

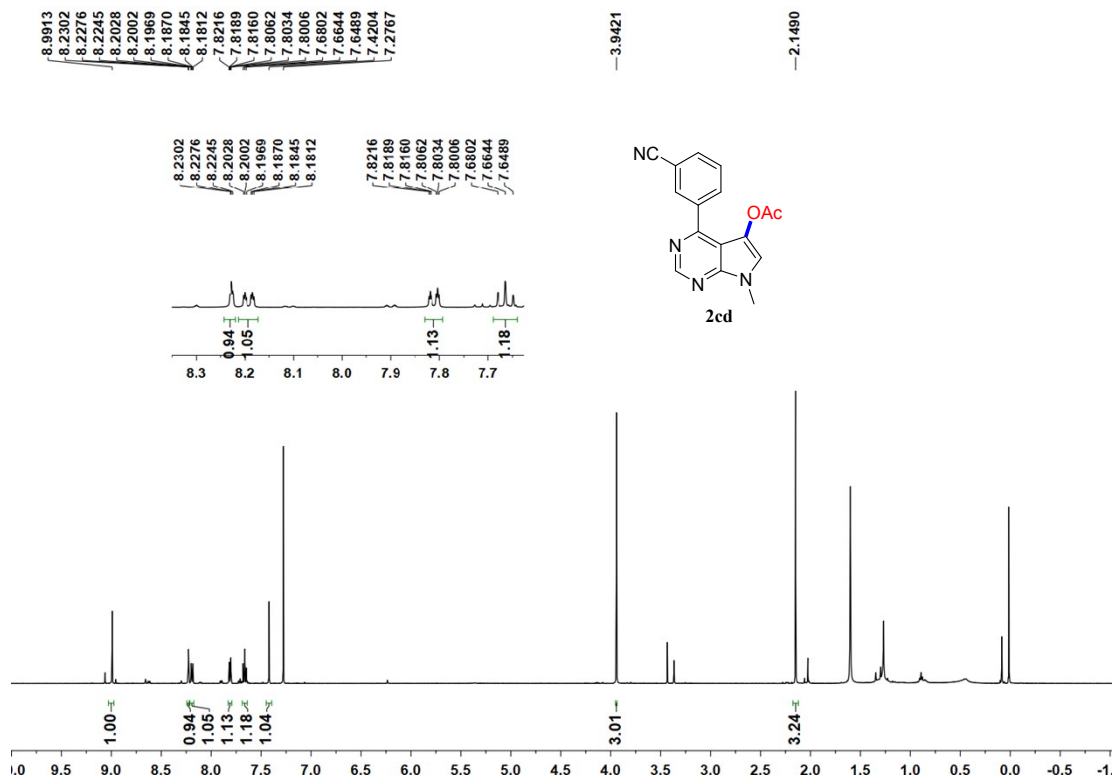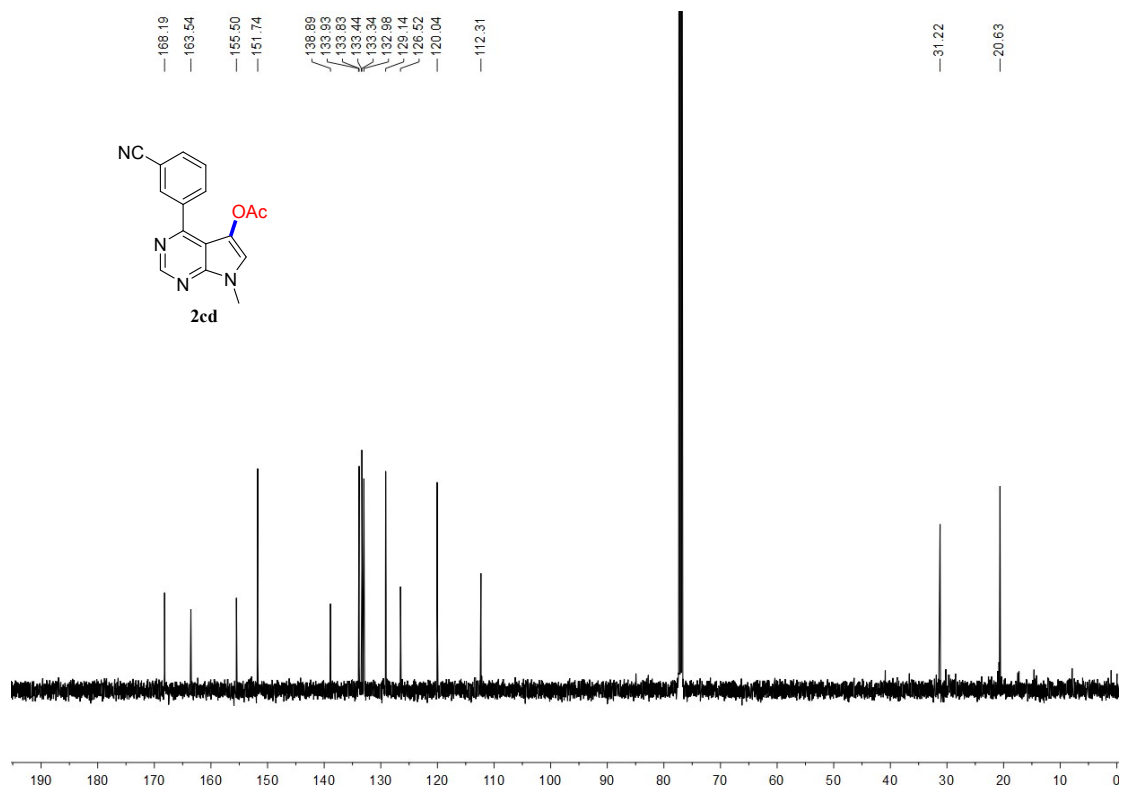

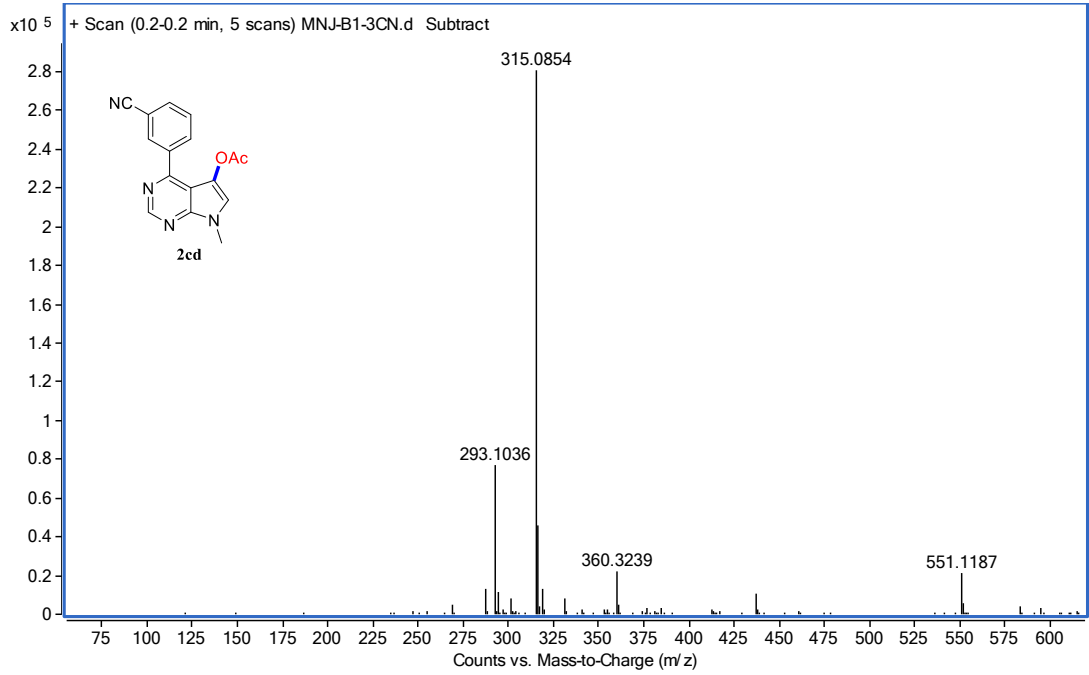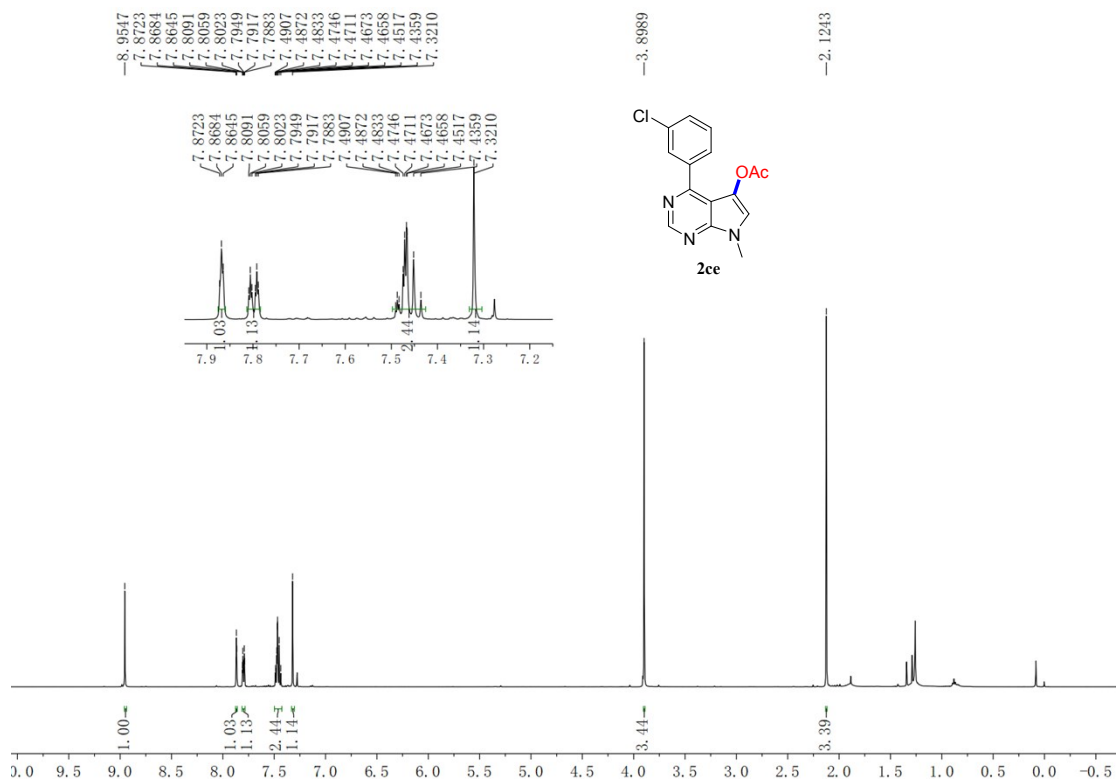

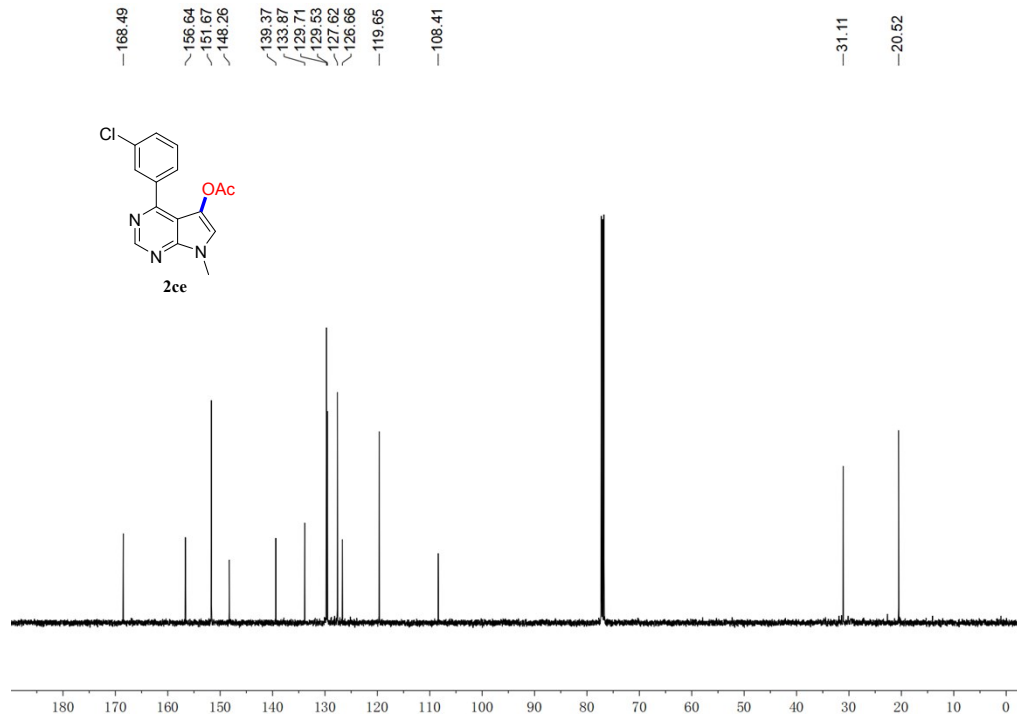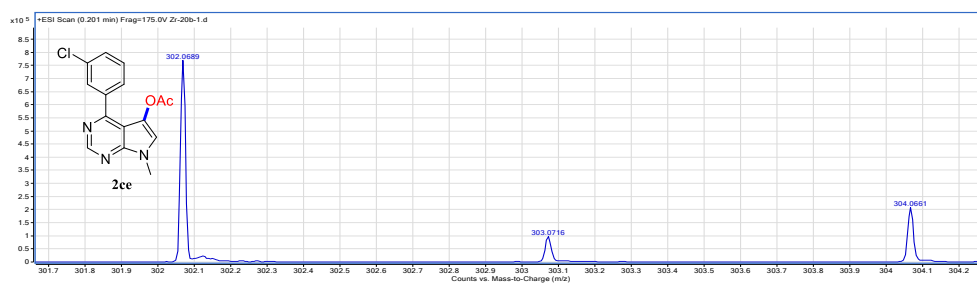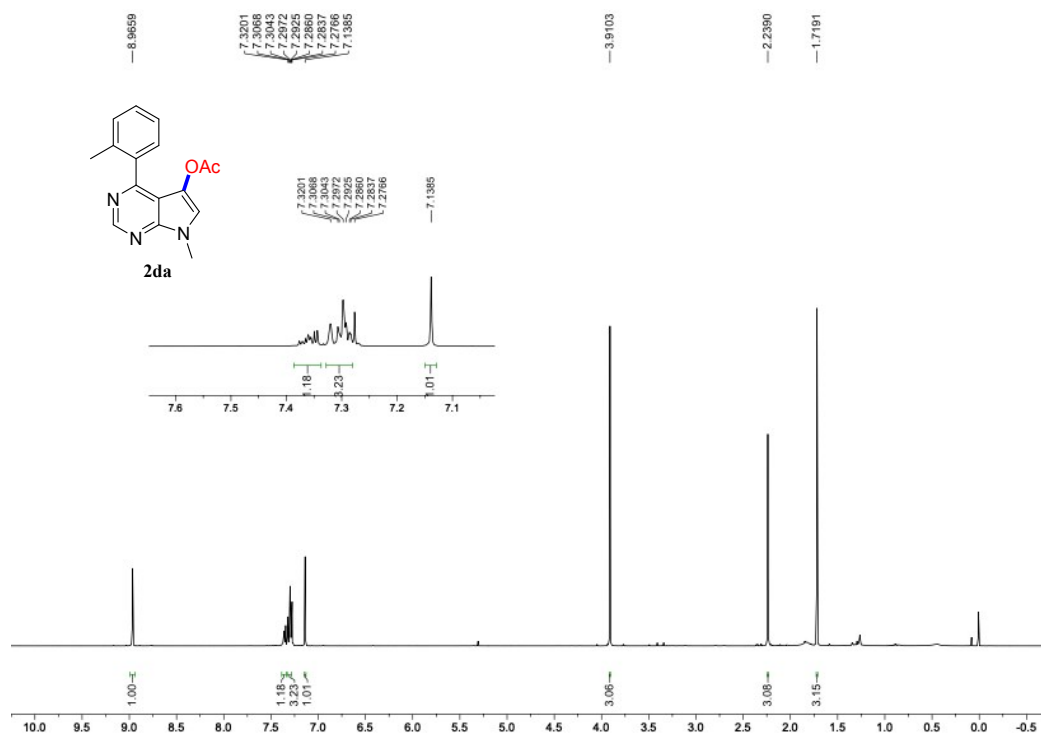

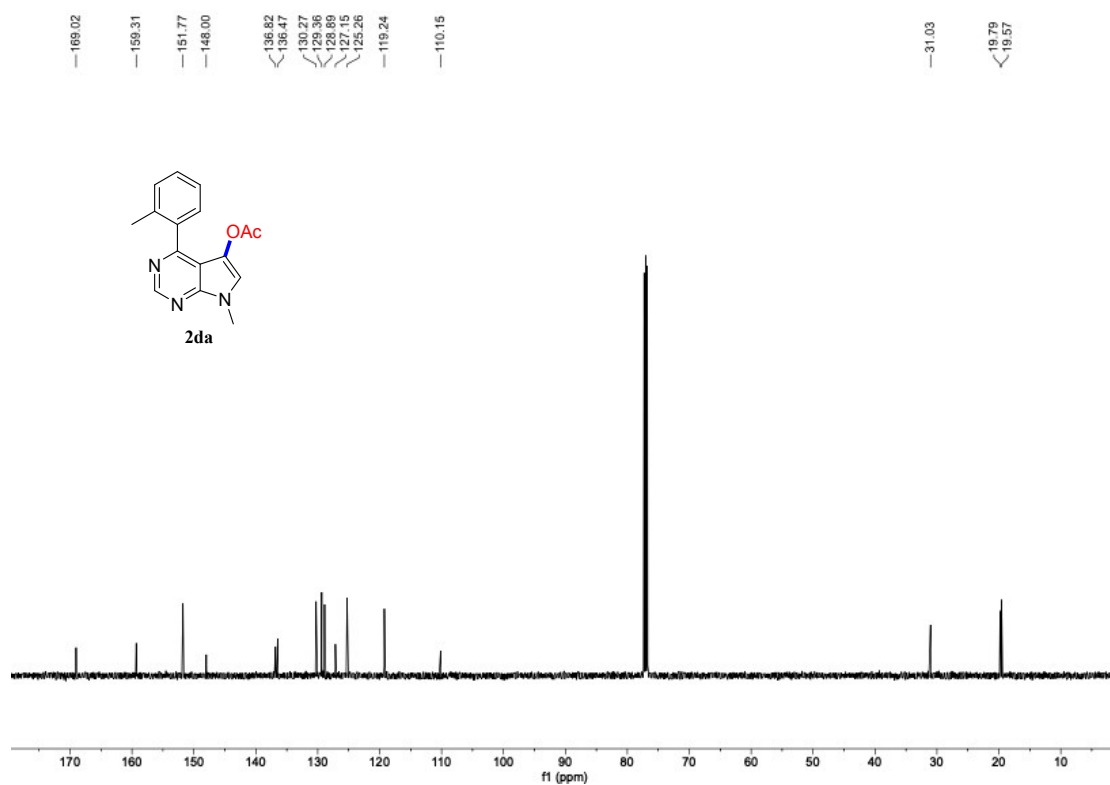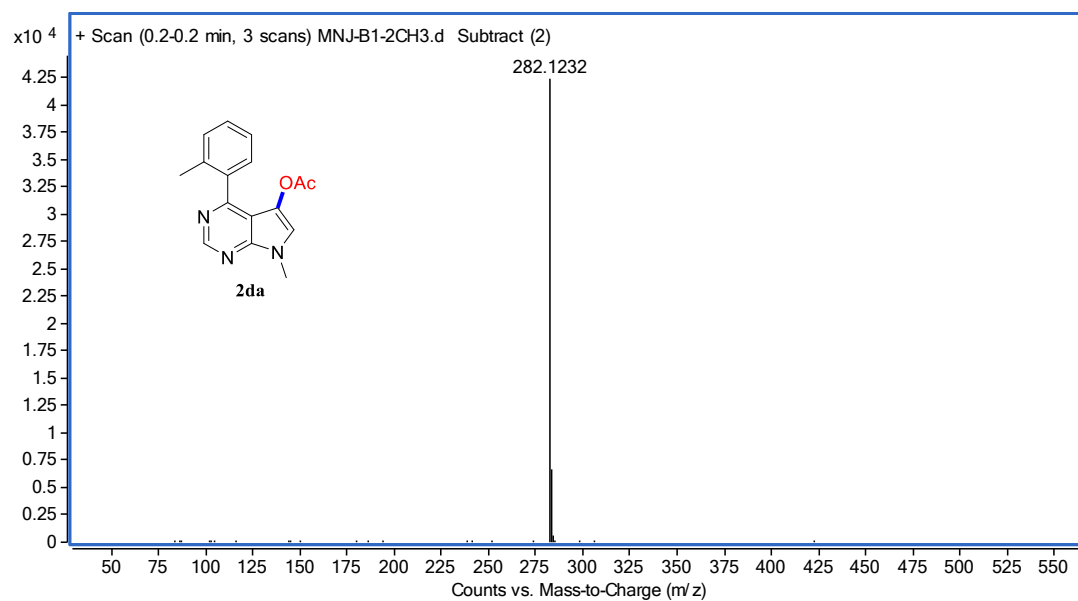

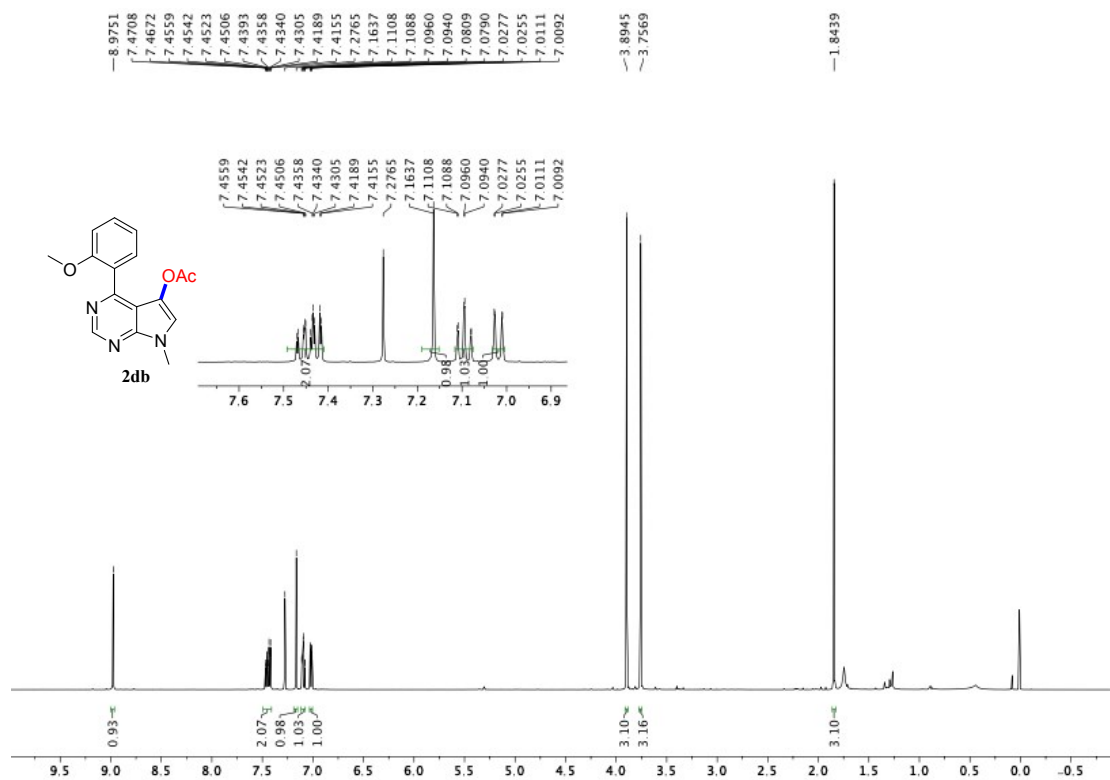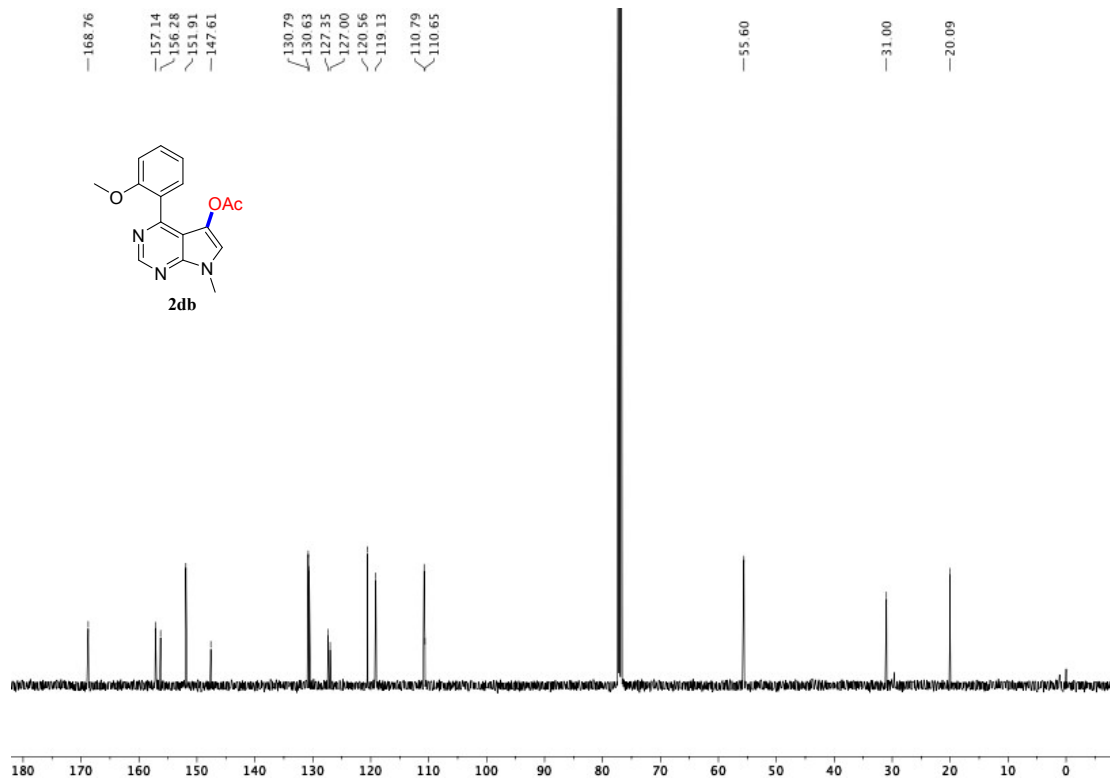

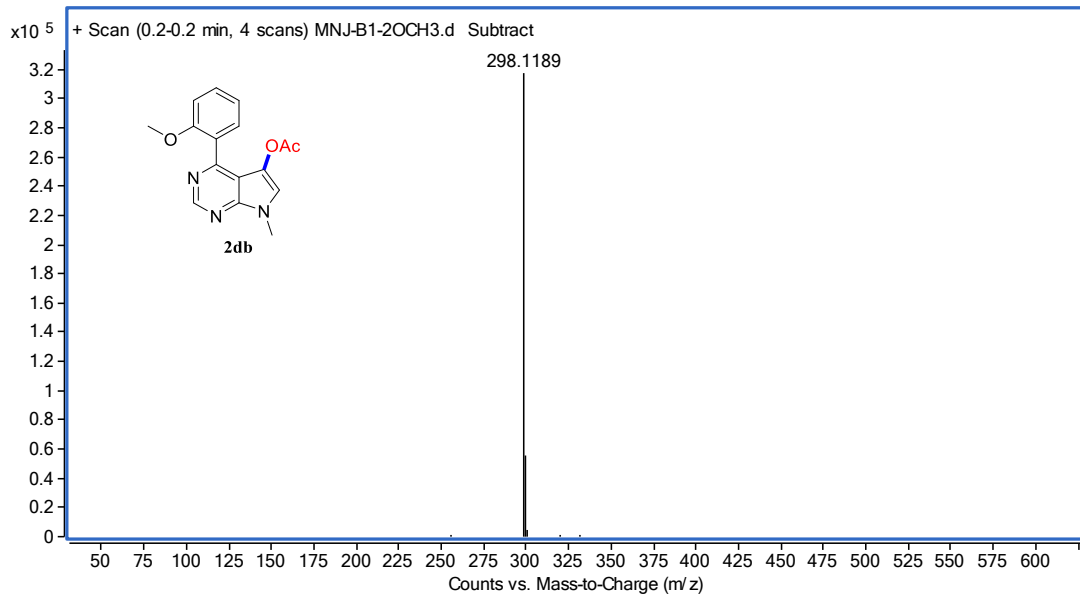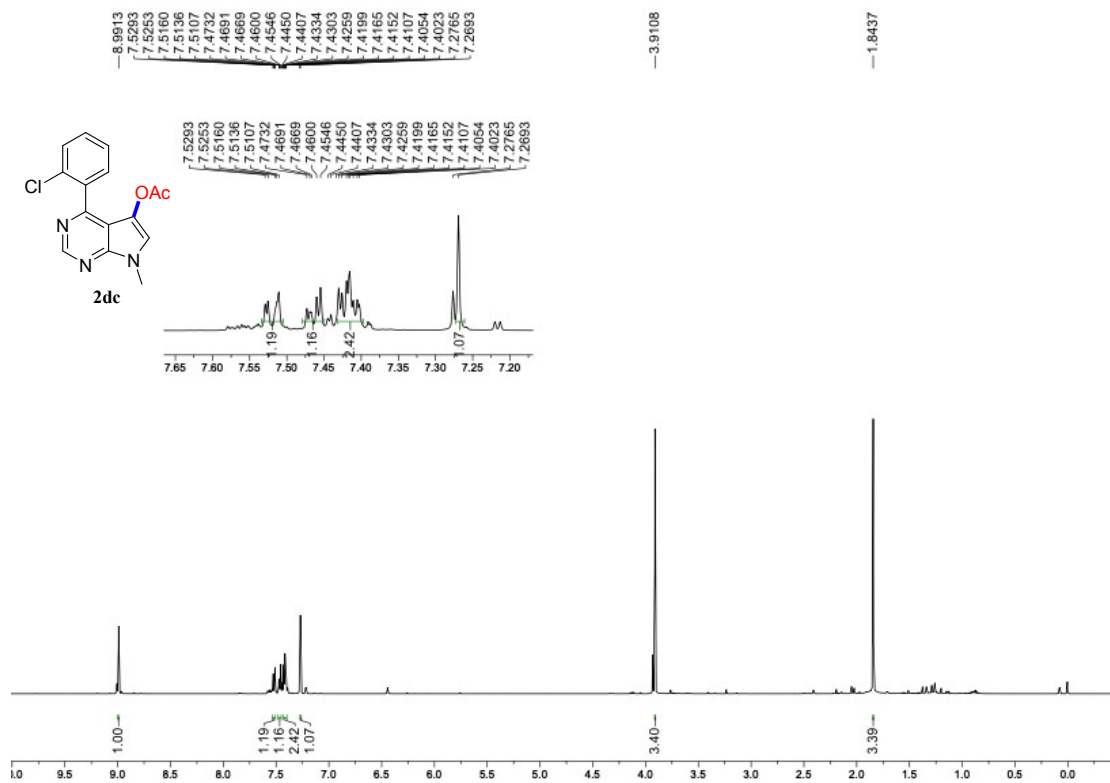

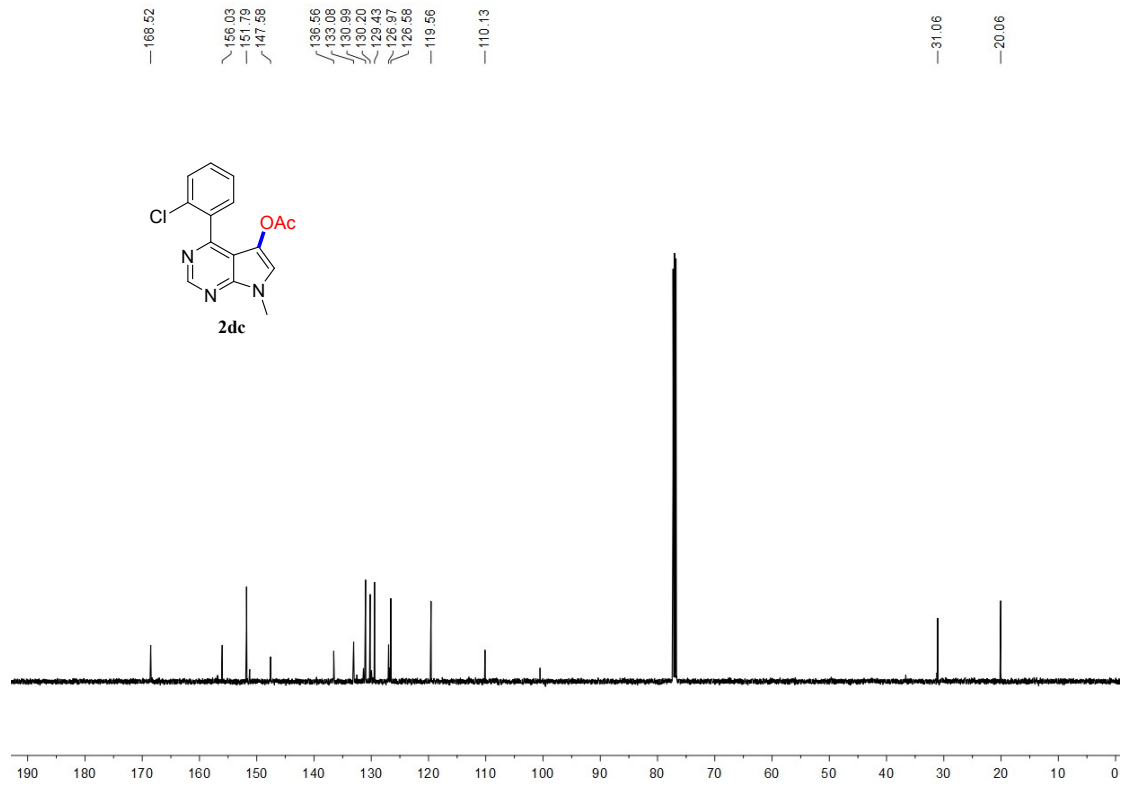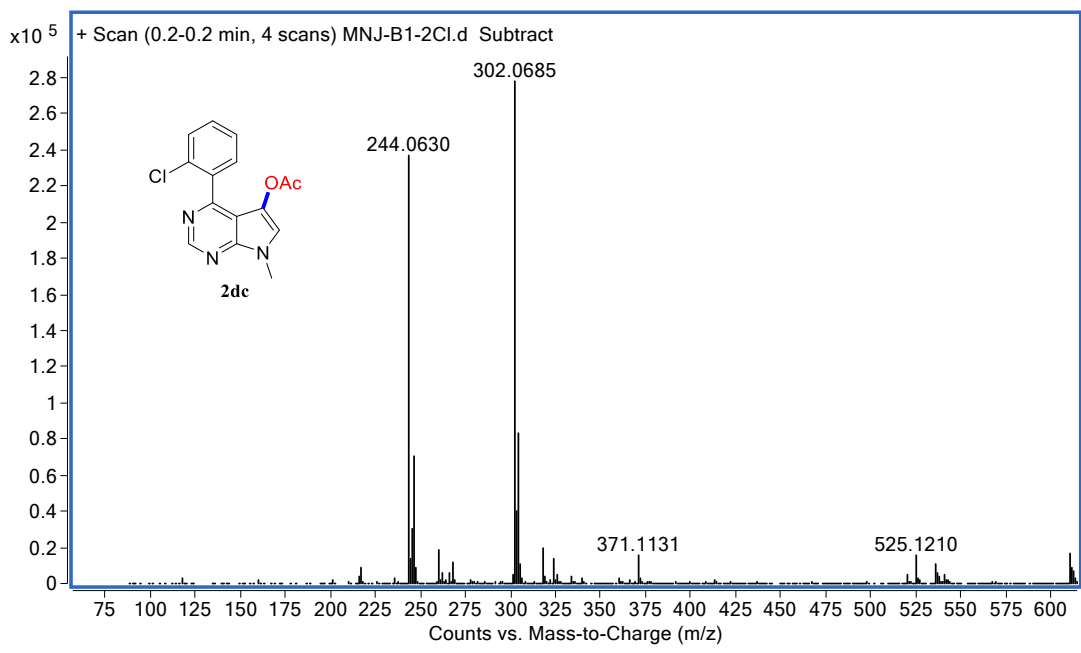



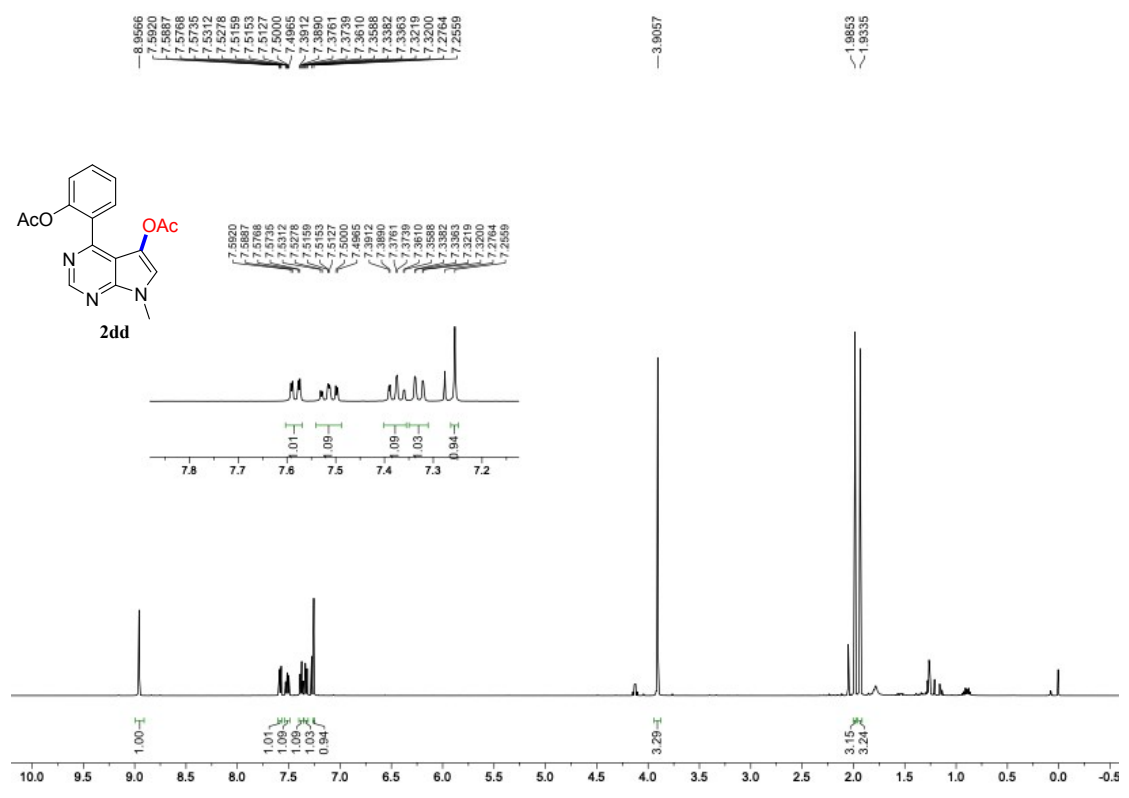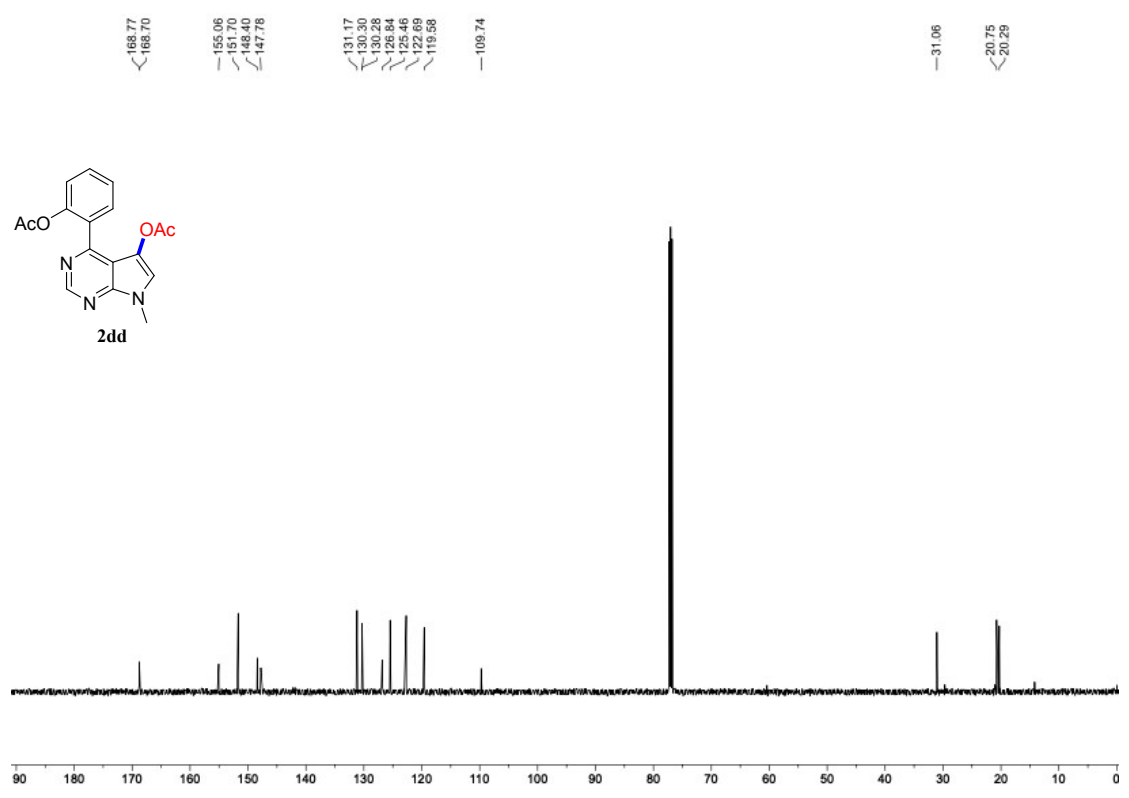

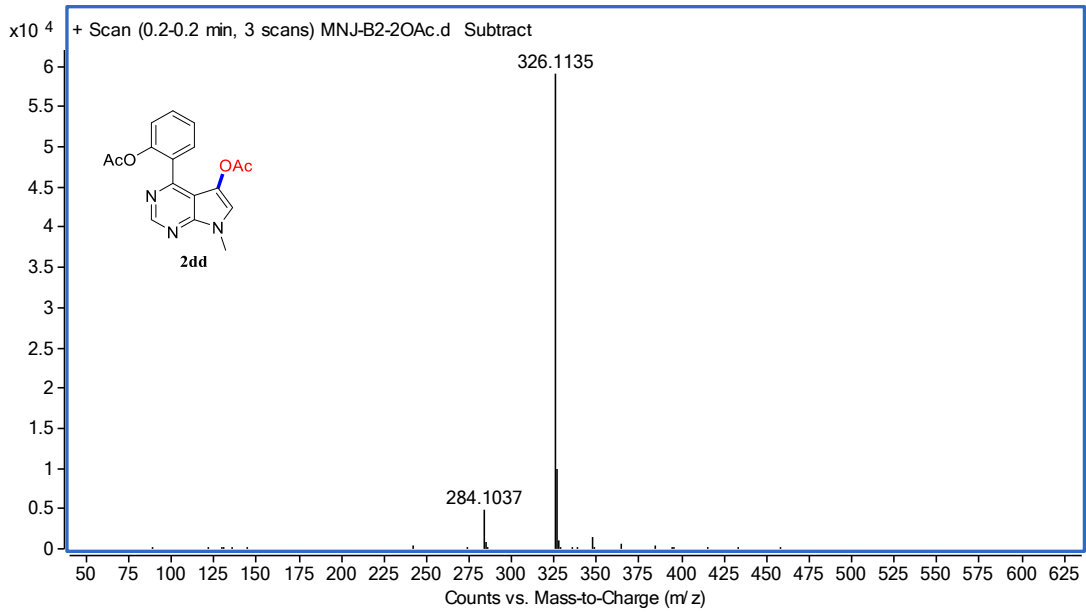

8.9503  
7.7981  
7.7959  
7.7938  
7.7784  
7.7757  
7.7714  
7.7603  
7.7560  
7.6902  
7.6887  
7.6815  
7.3489  
7.3275  
7.3240  
7.3109  
7.3076  
7.2910  
7.2810  
7.2783

3.9208

2.1480

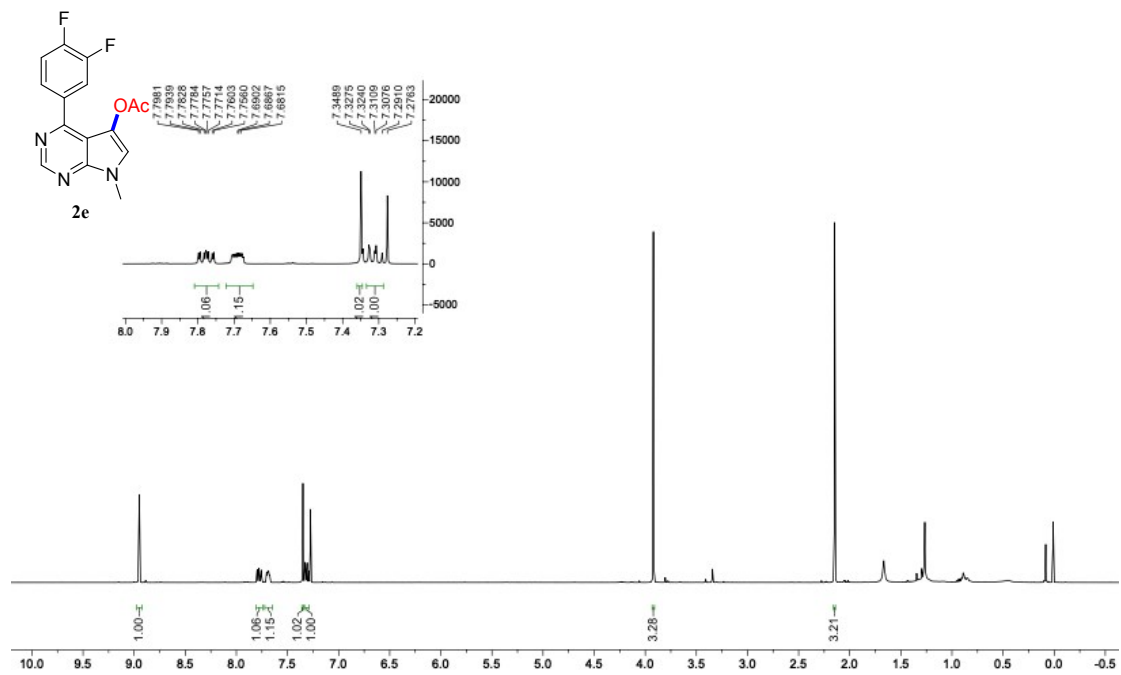

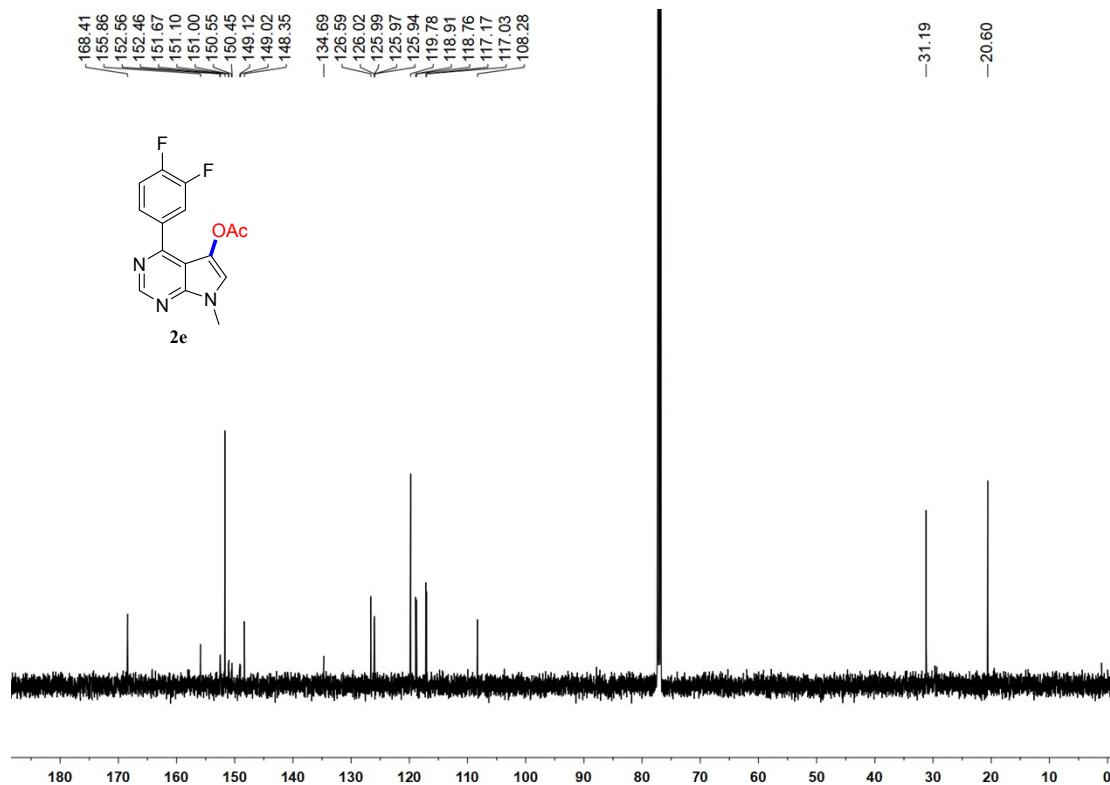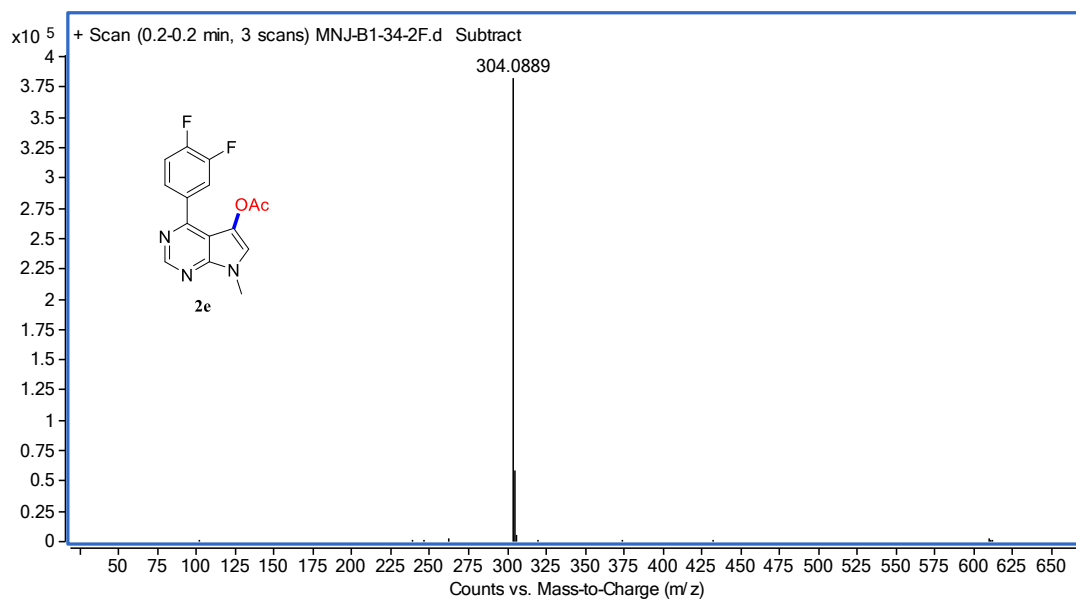

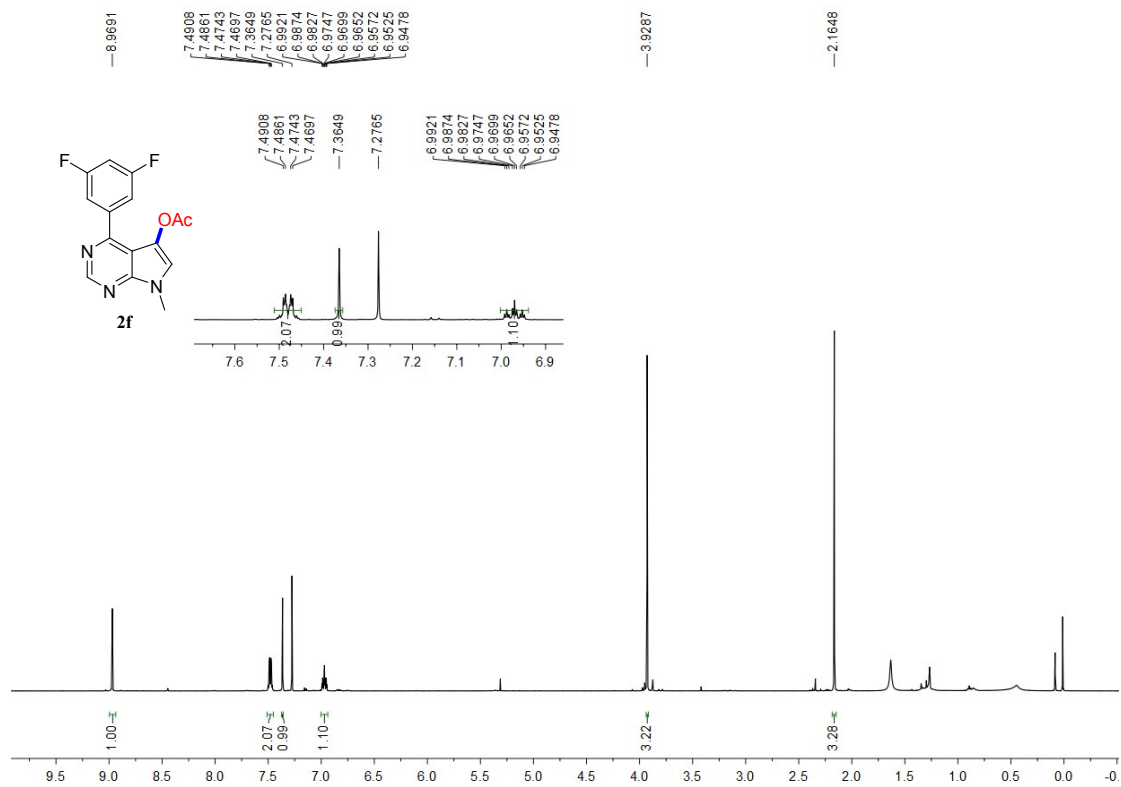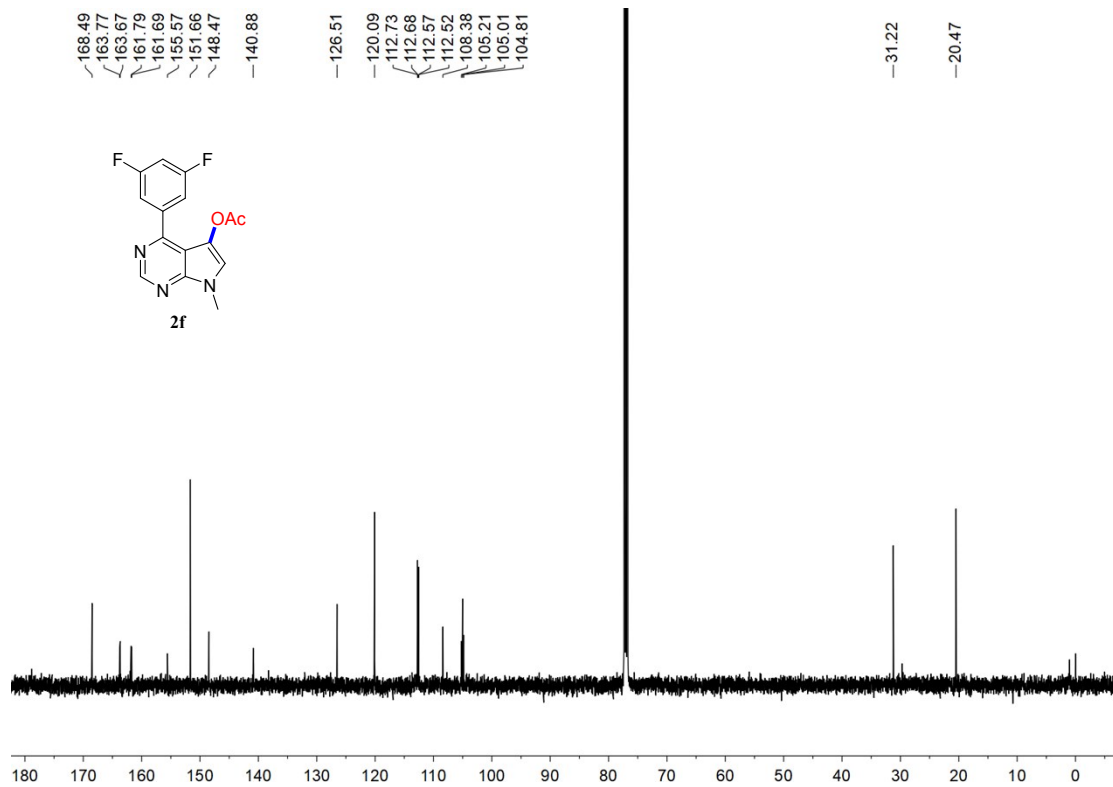

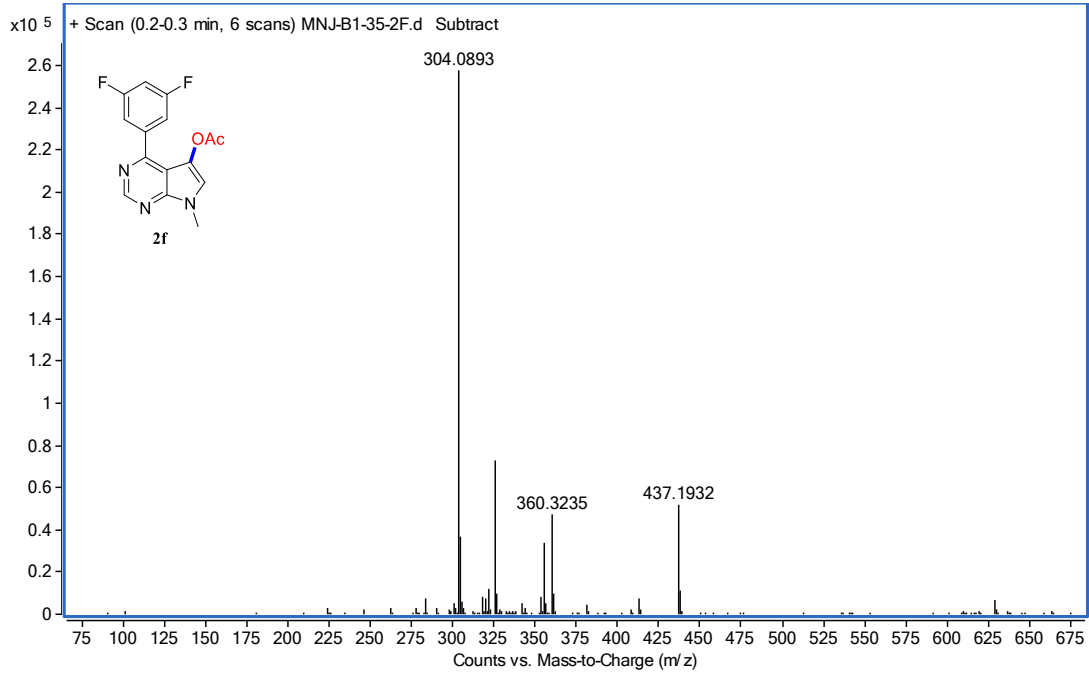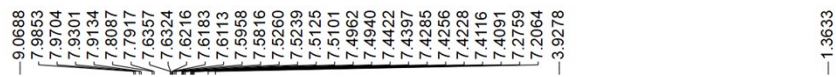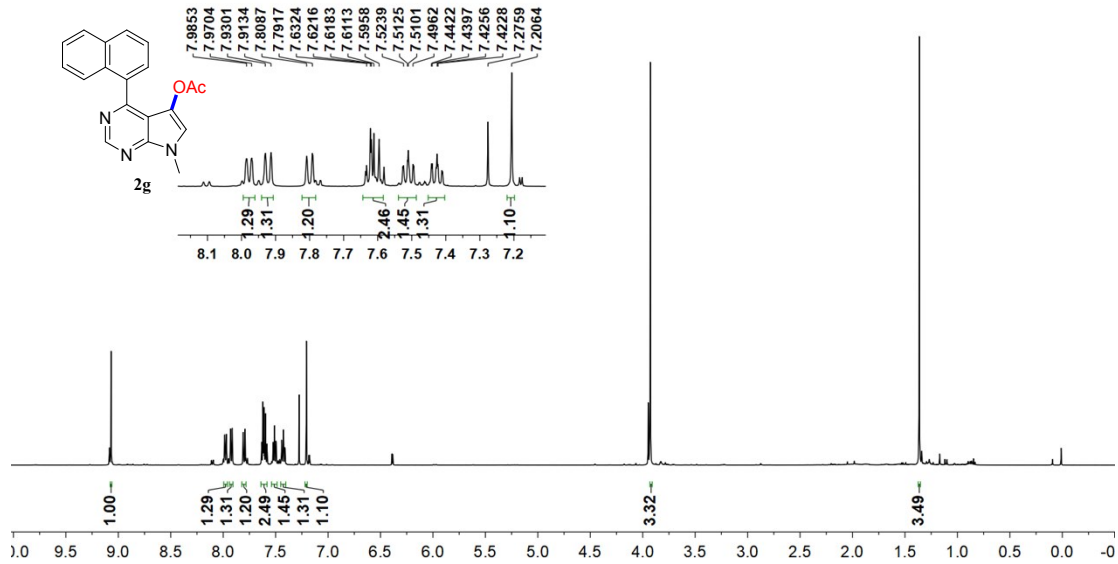

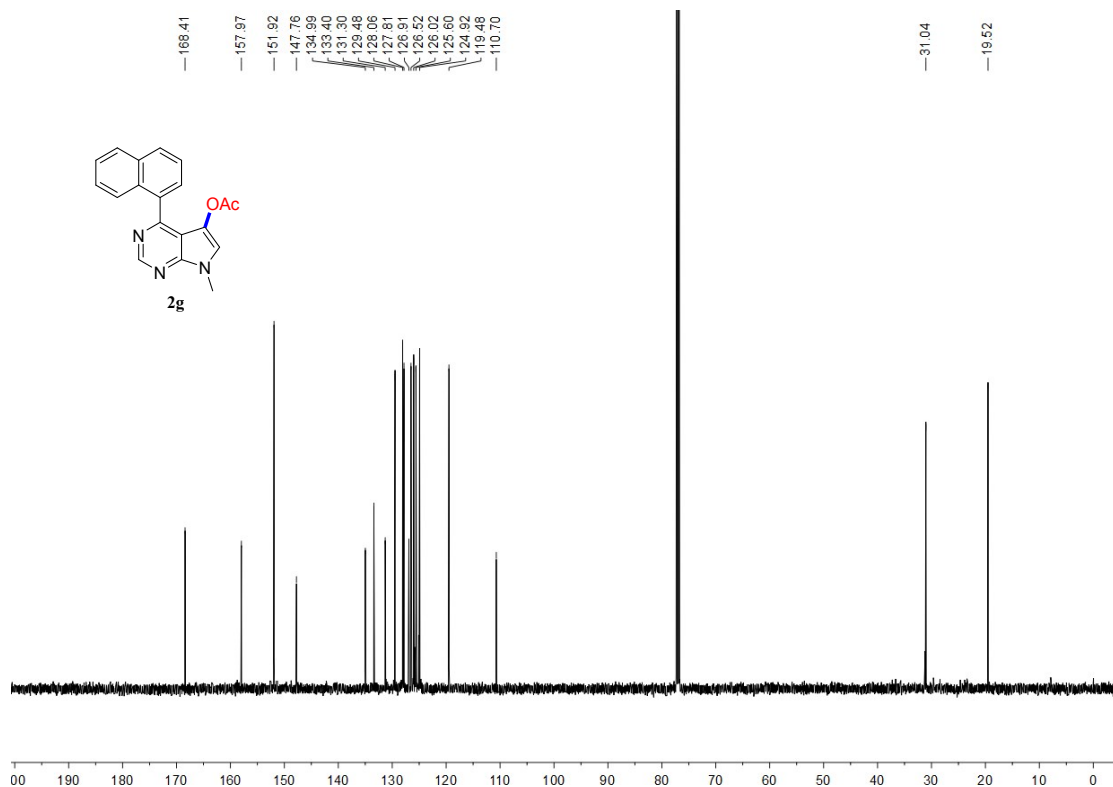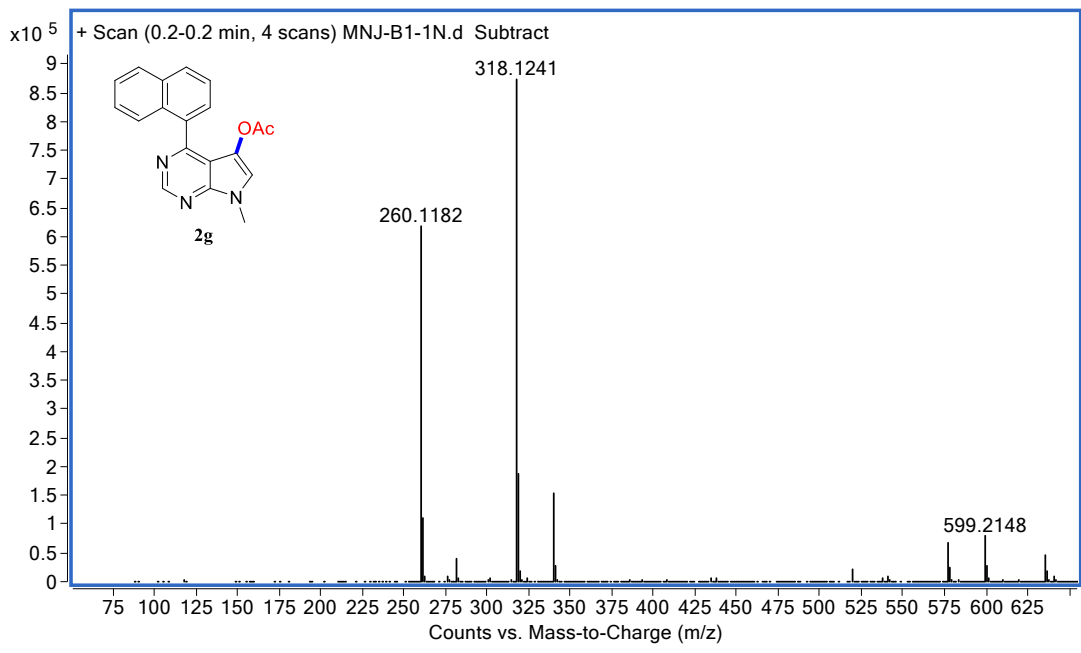

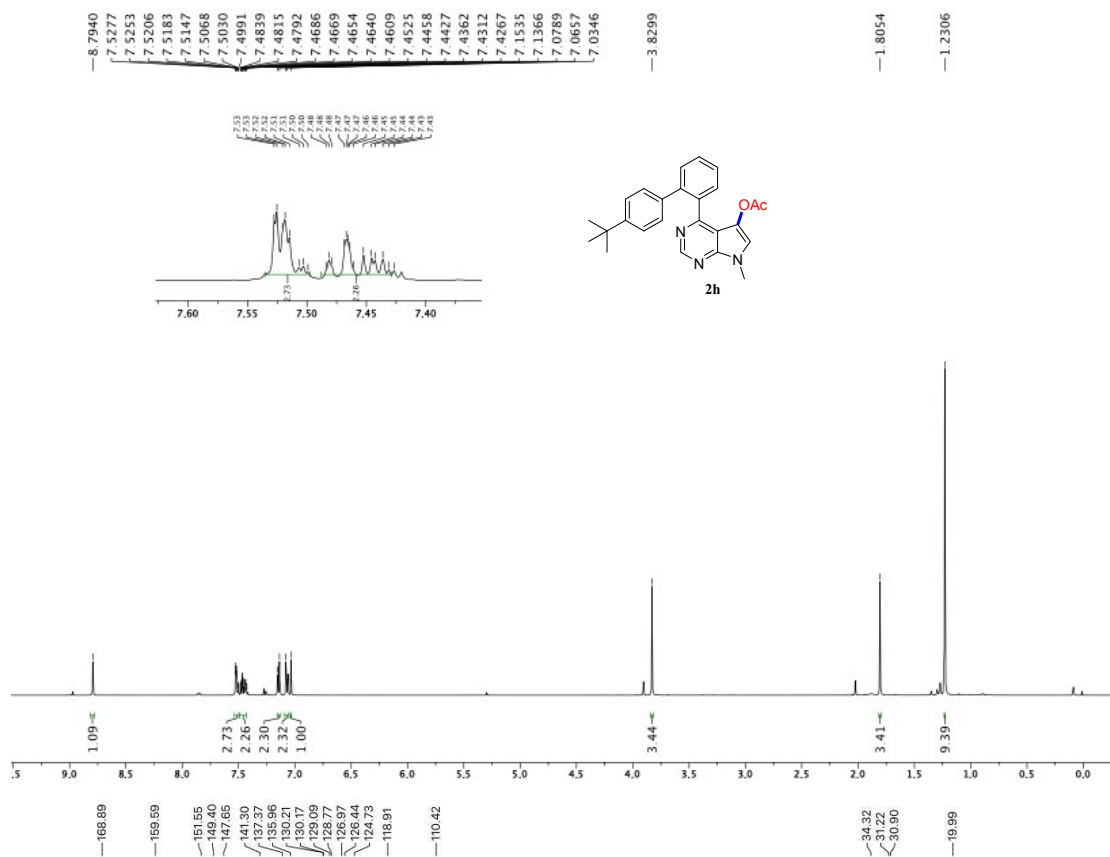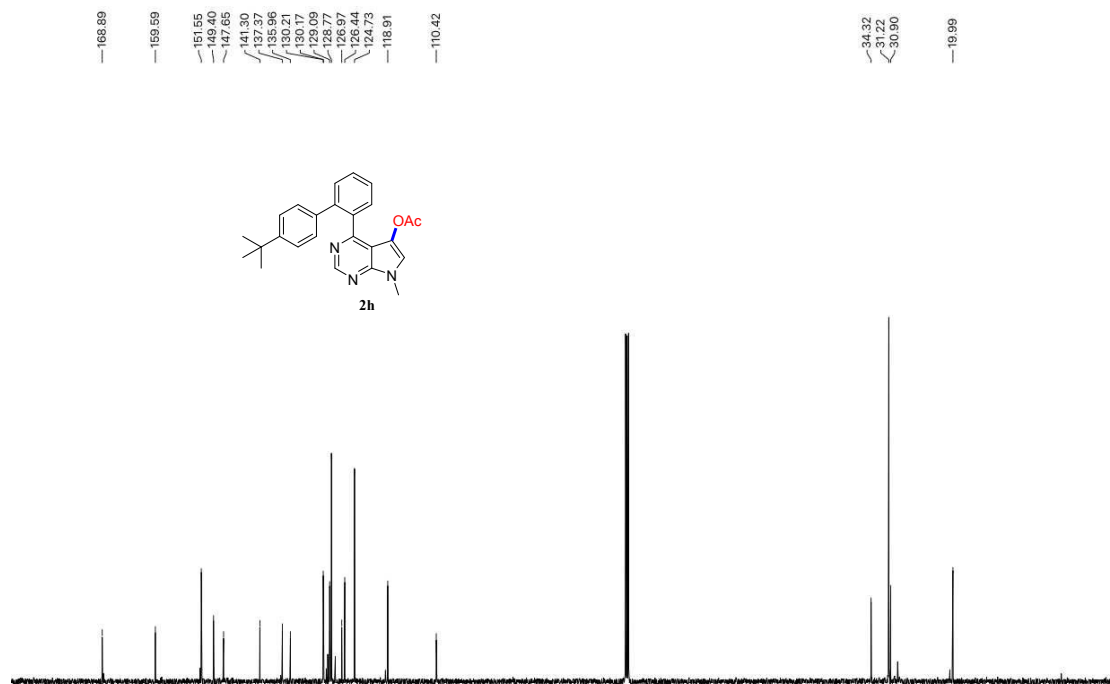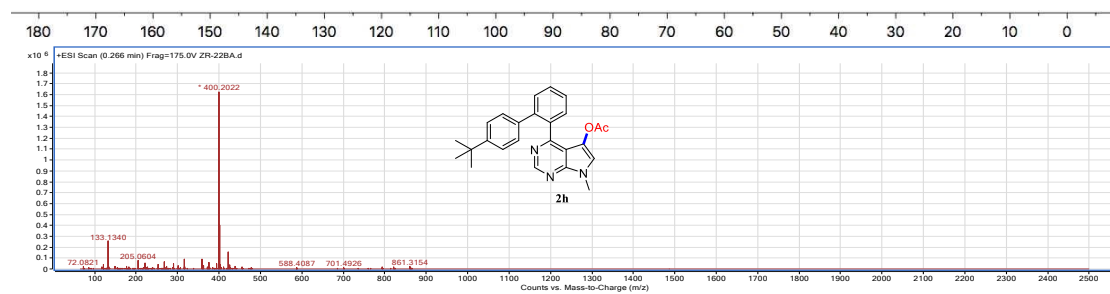

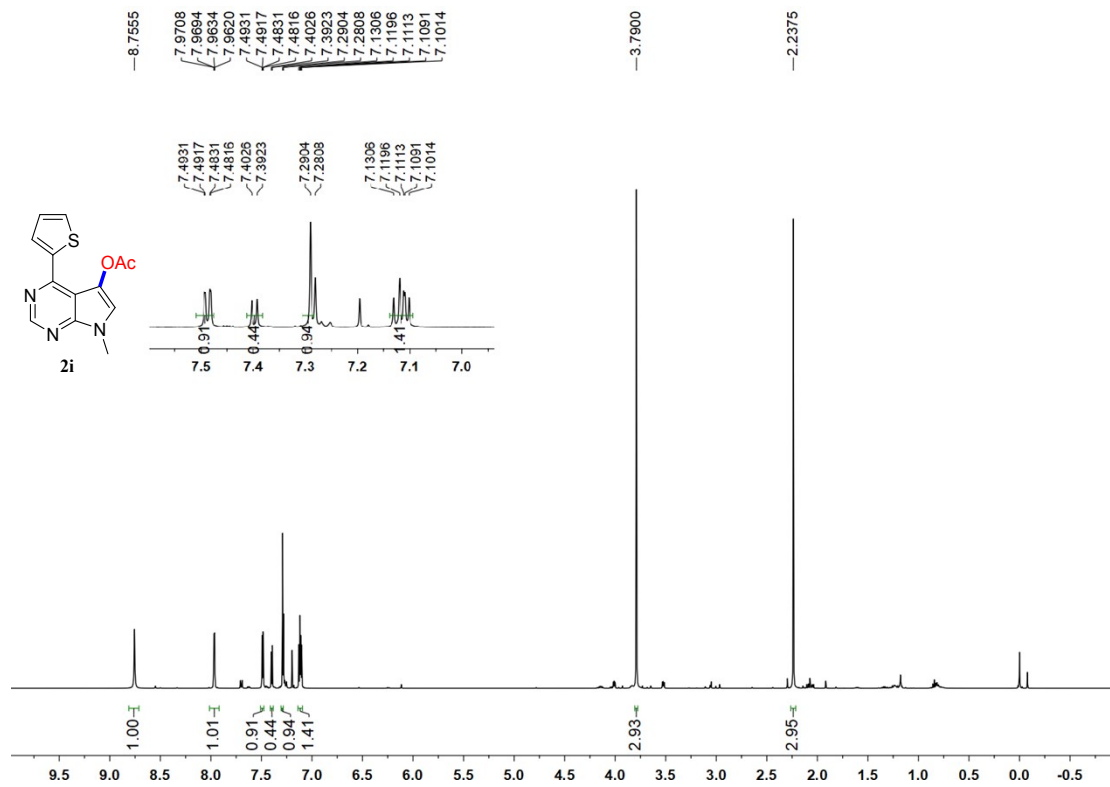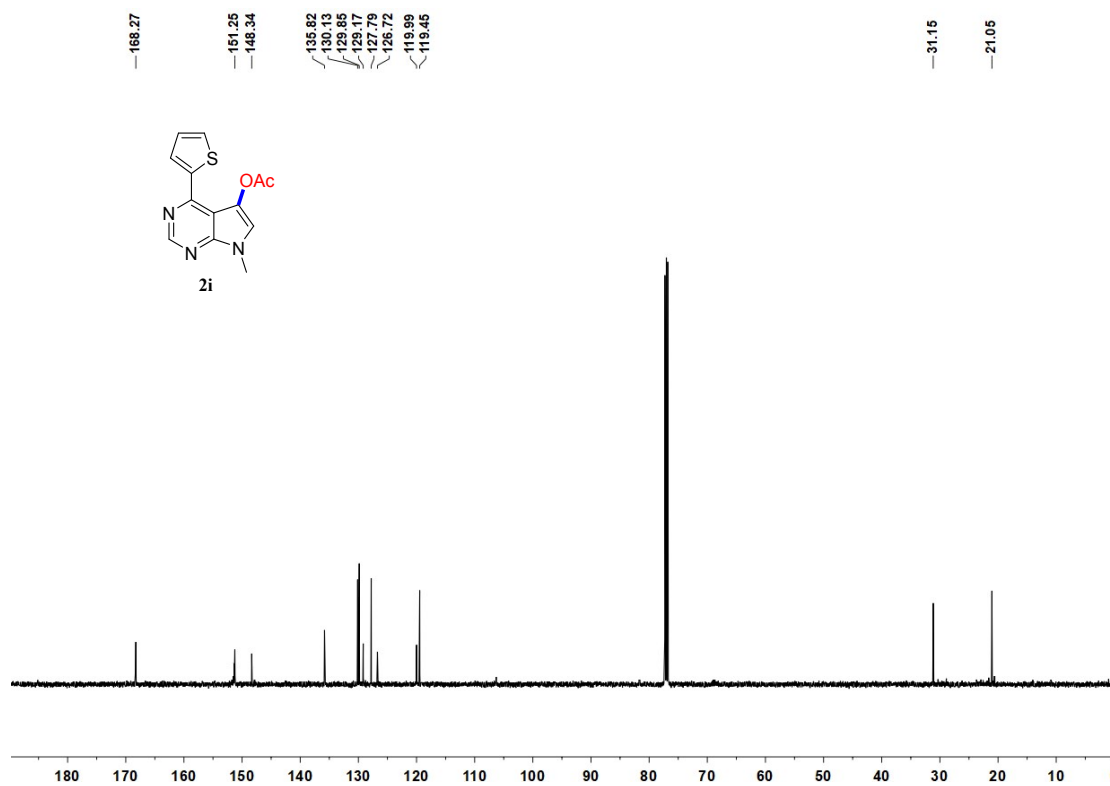



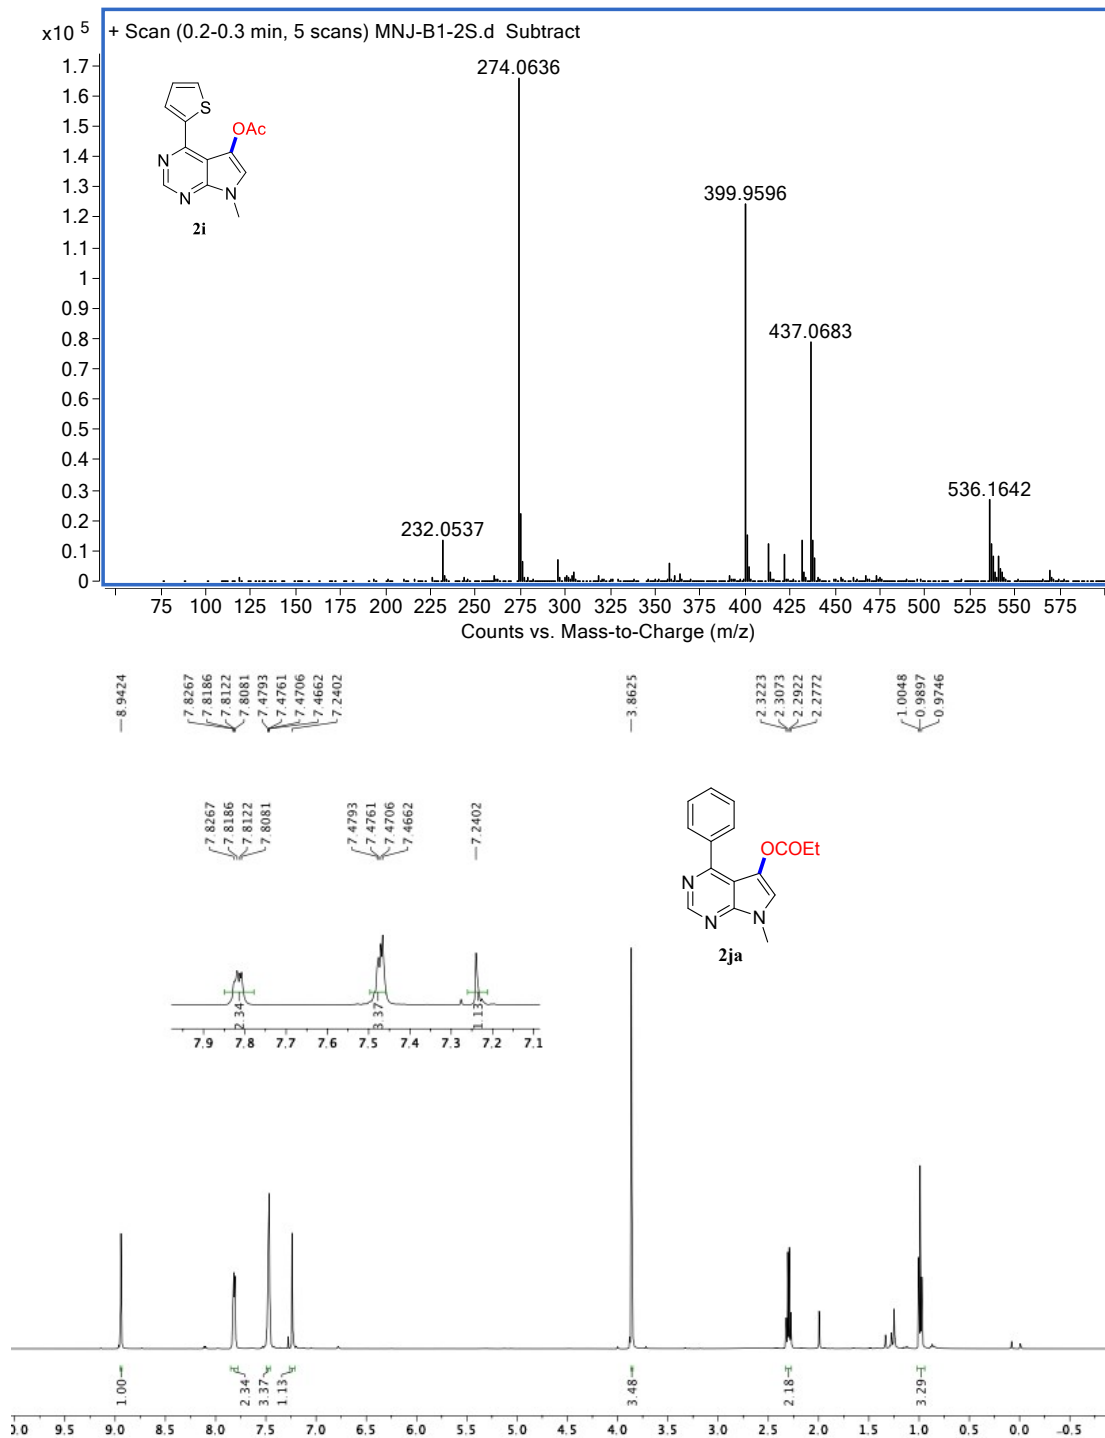

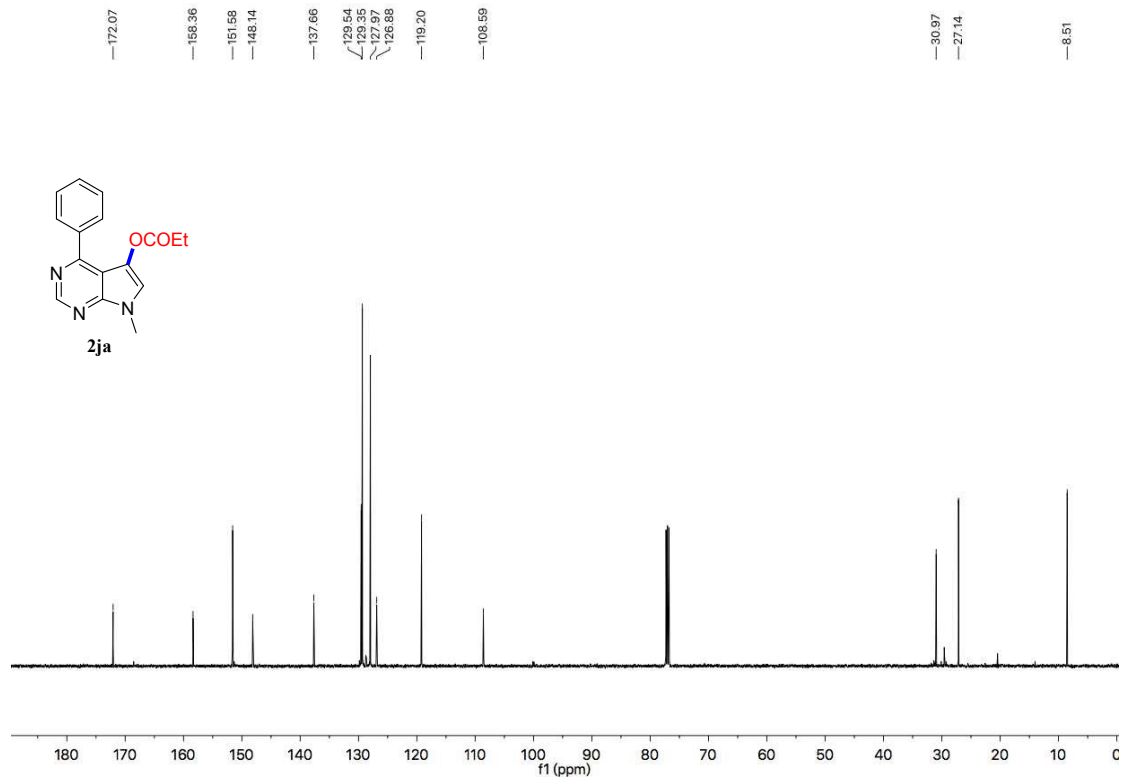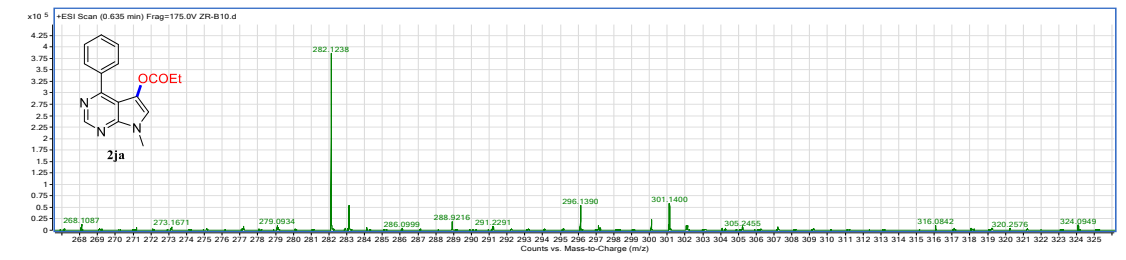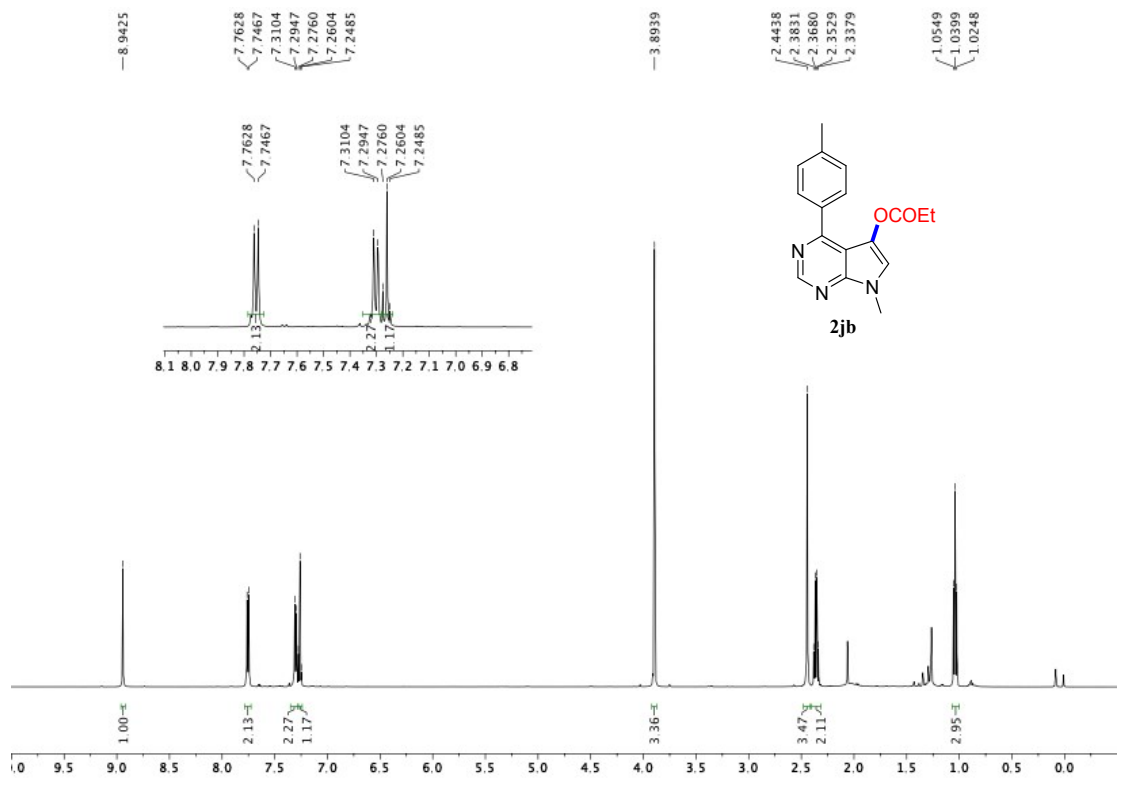

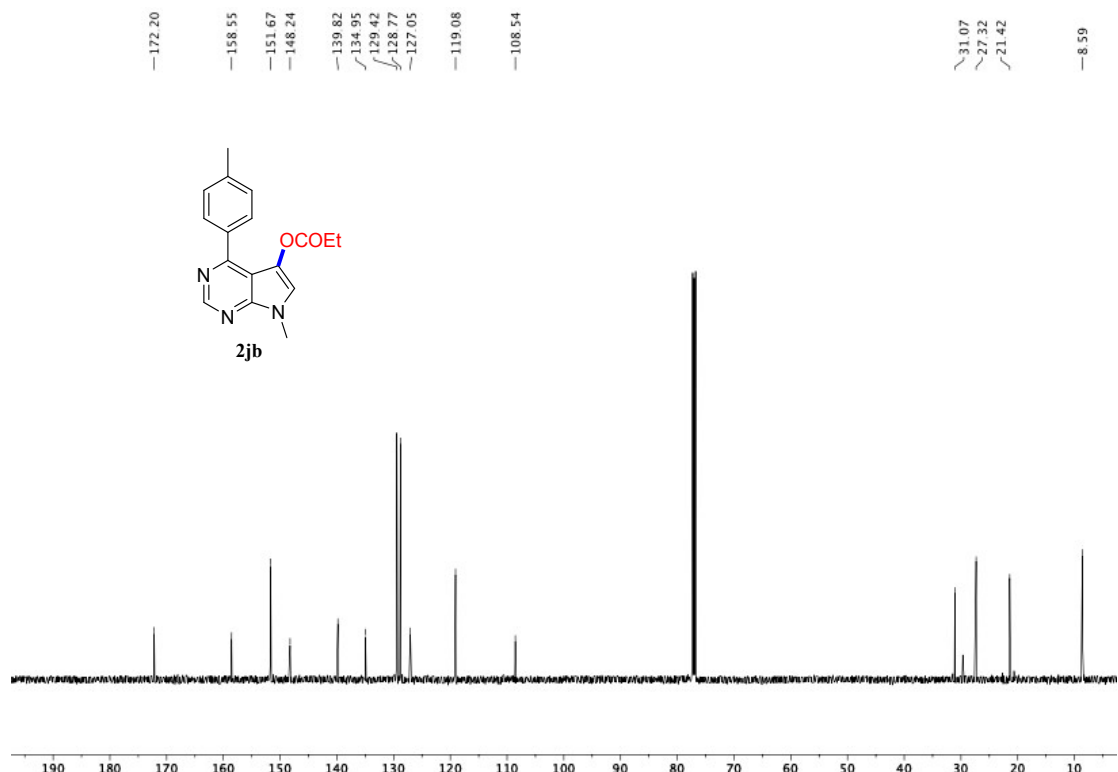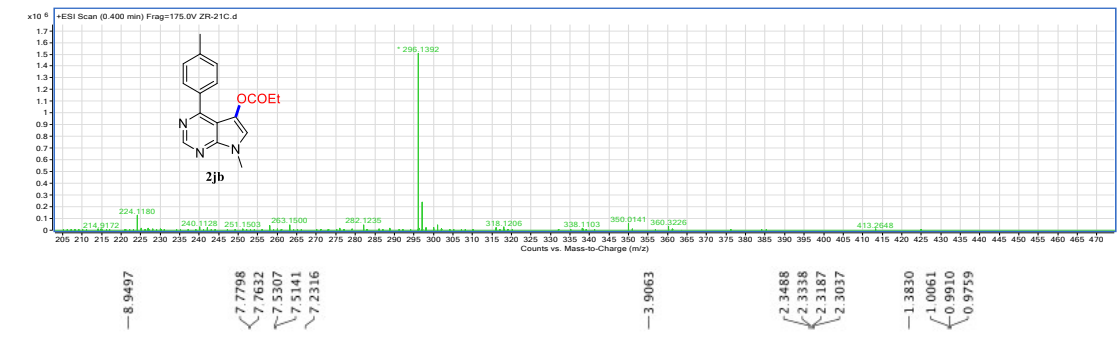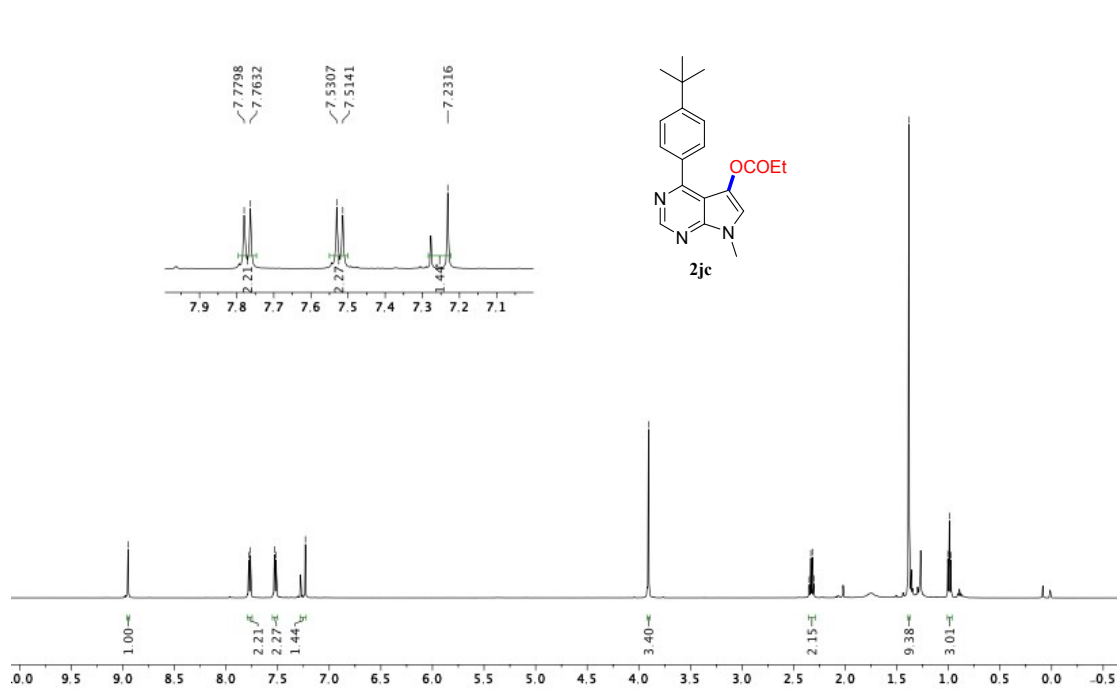

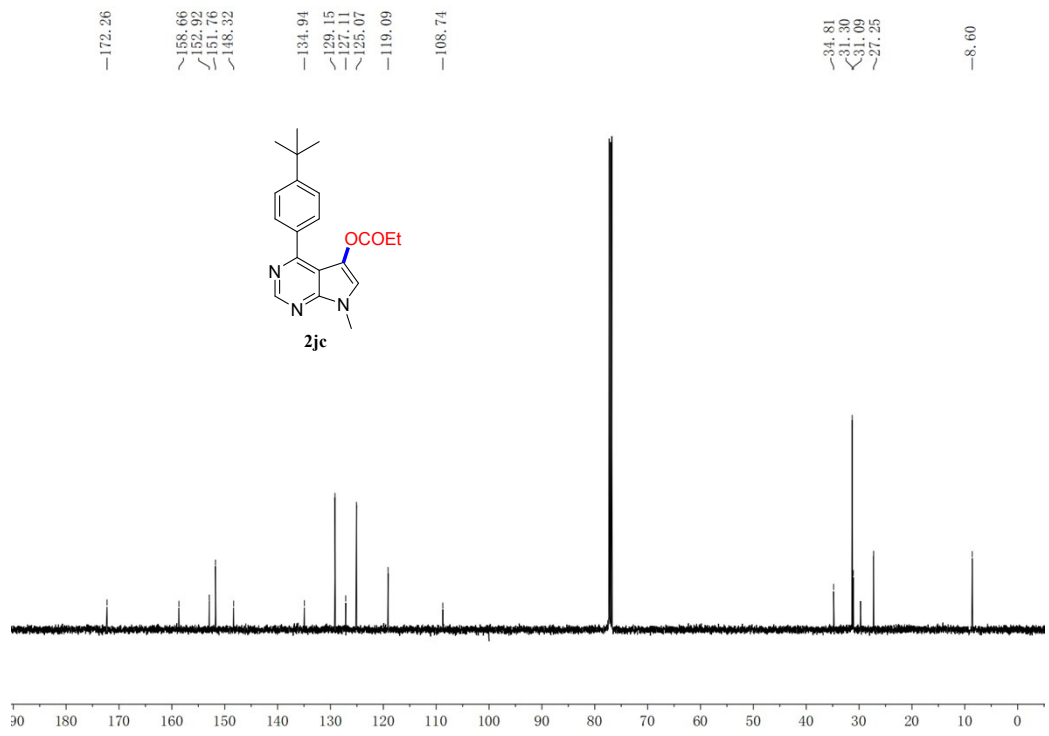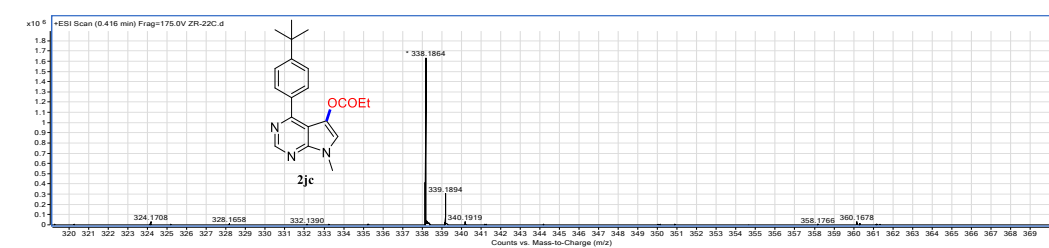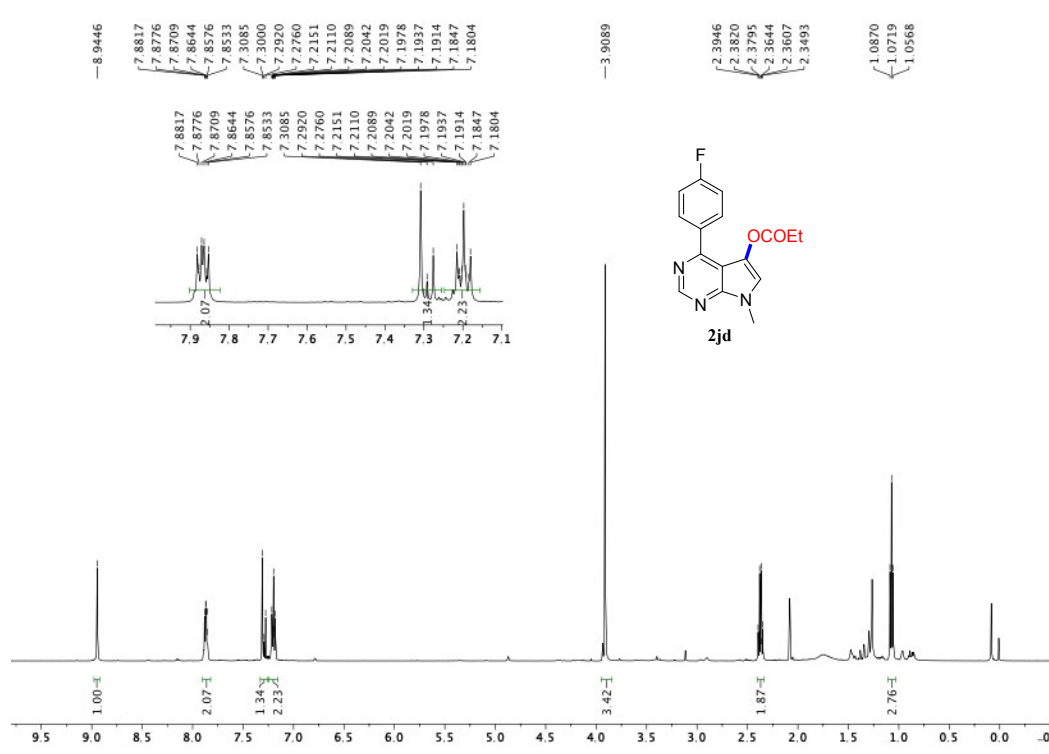

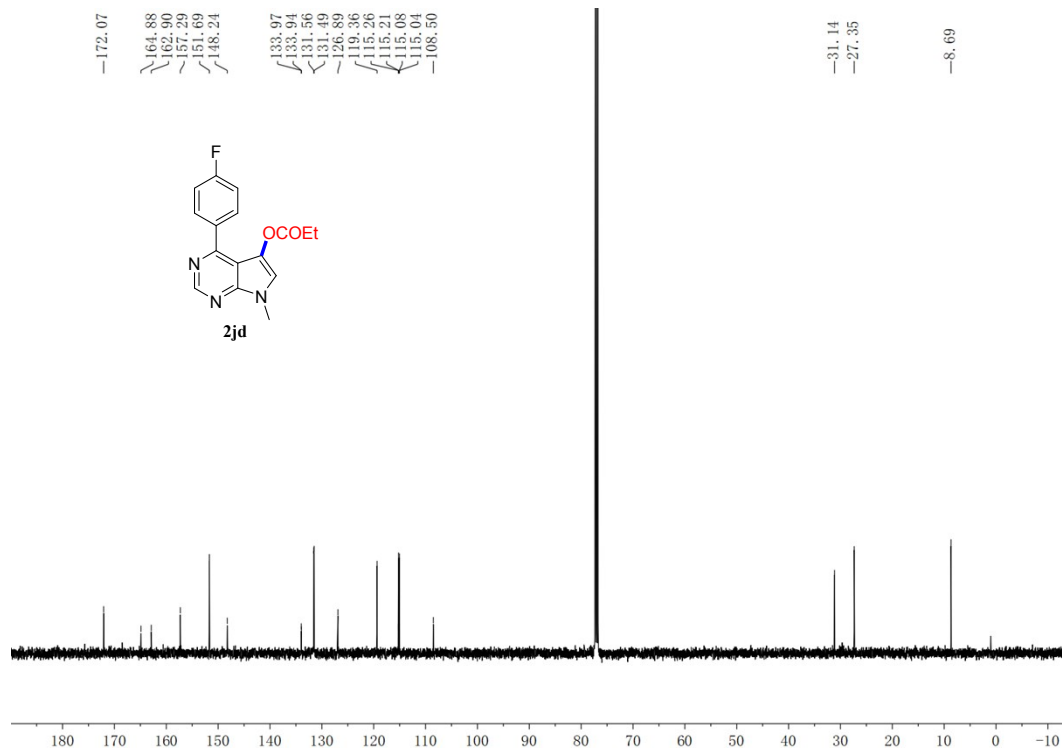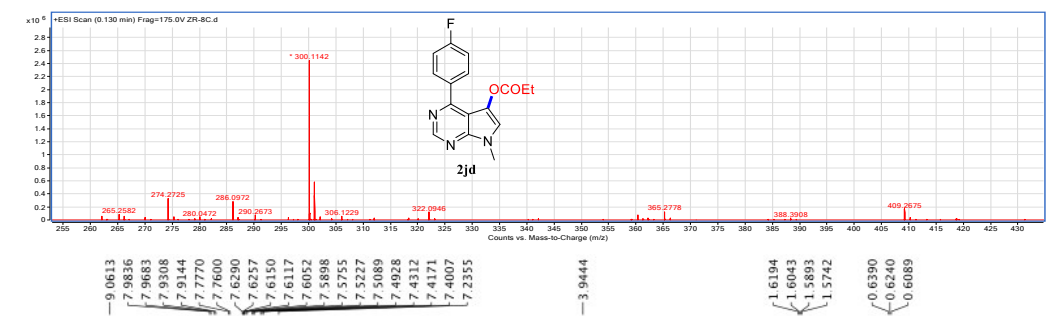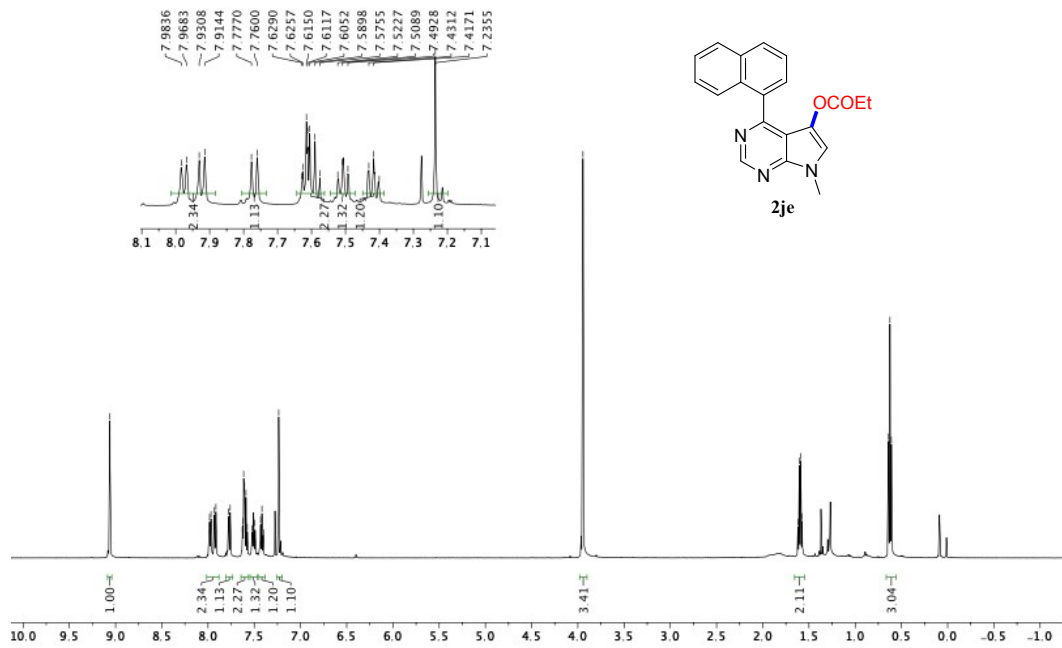

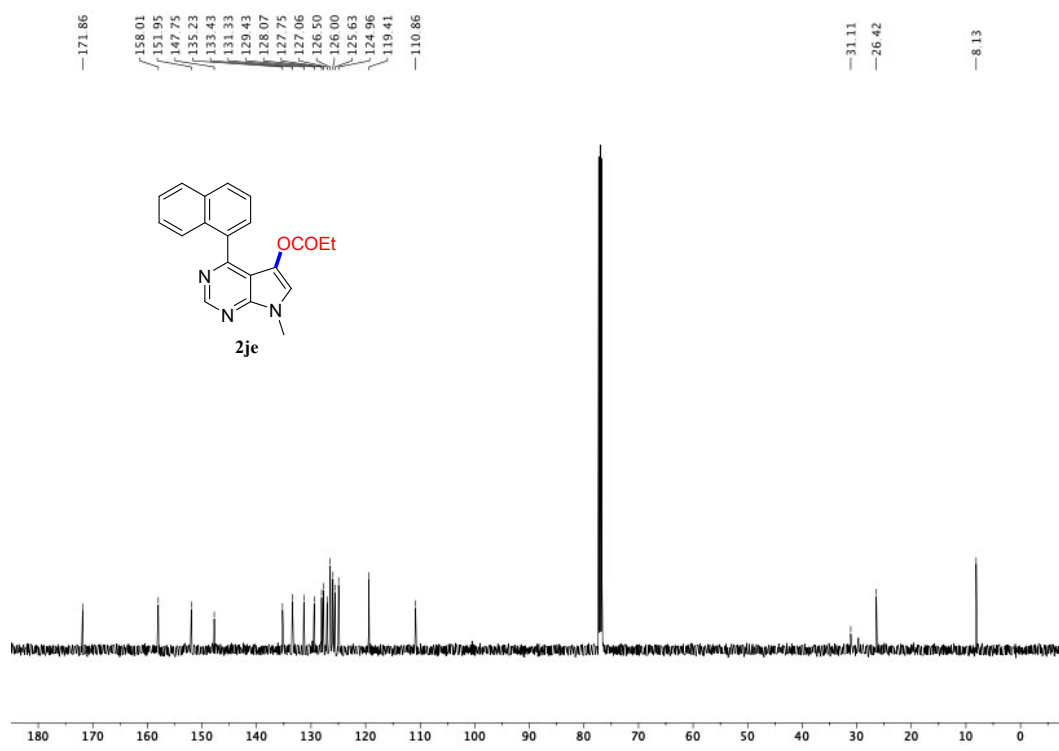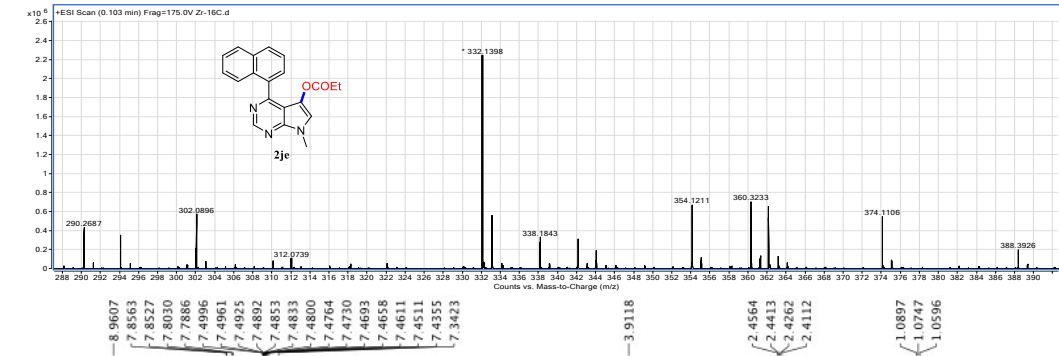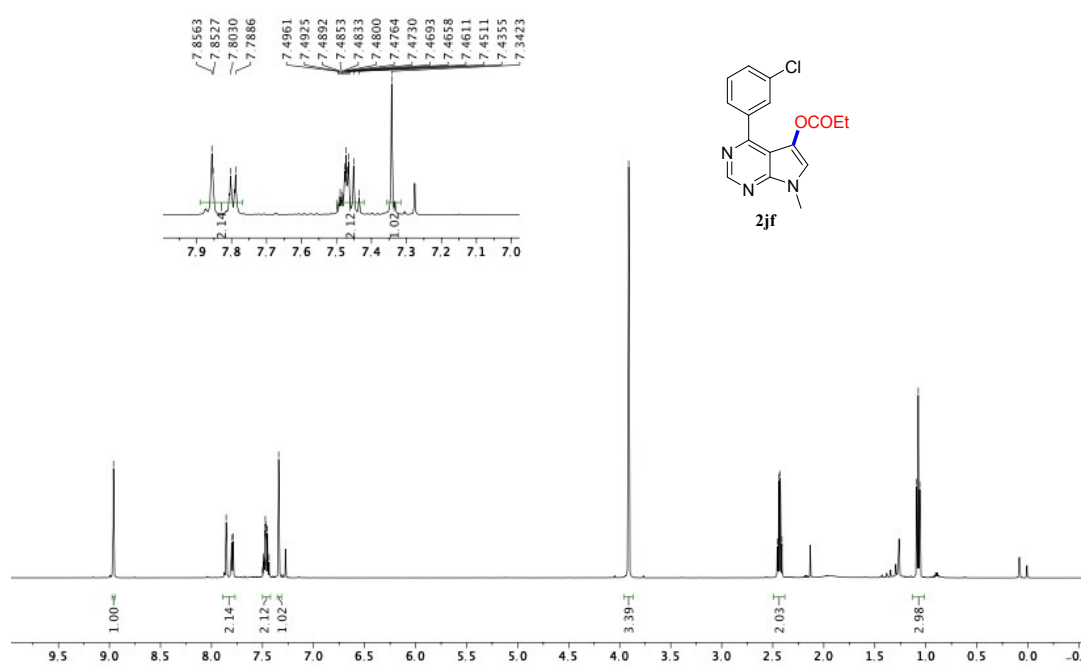

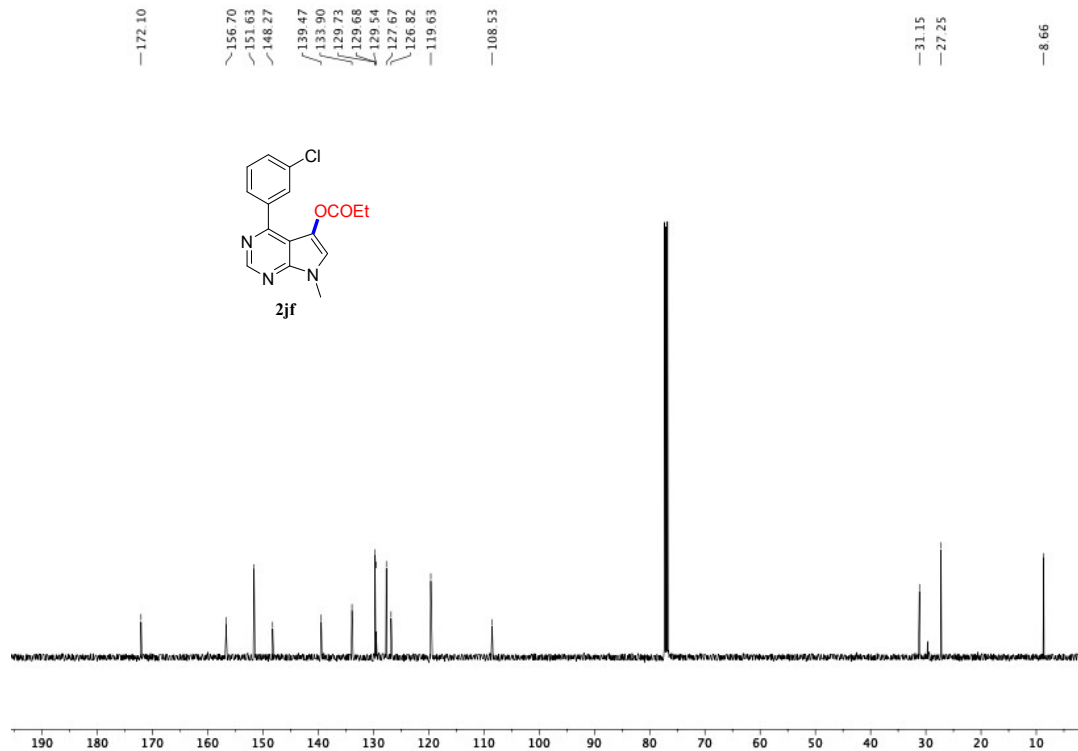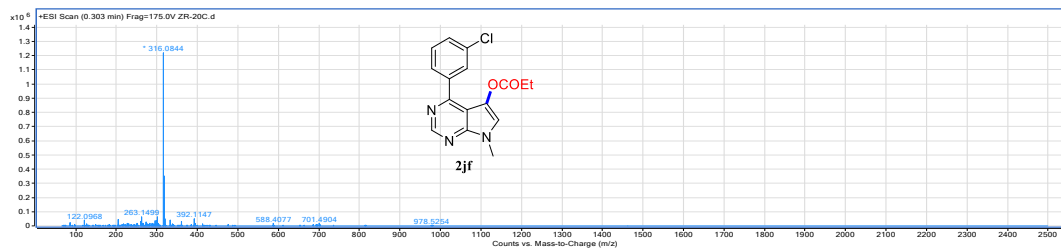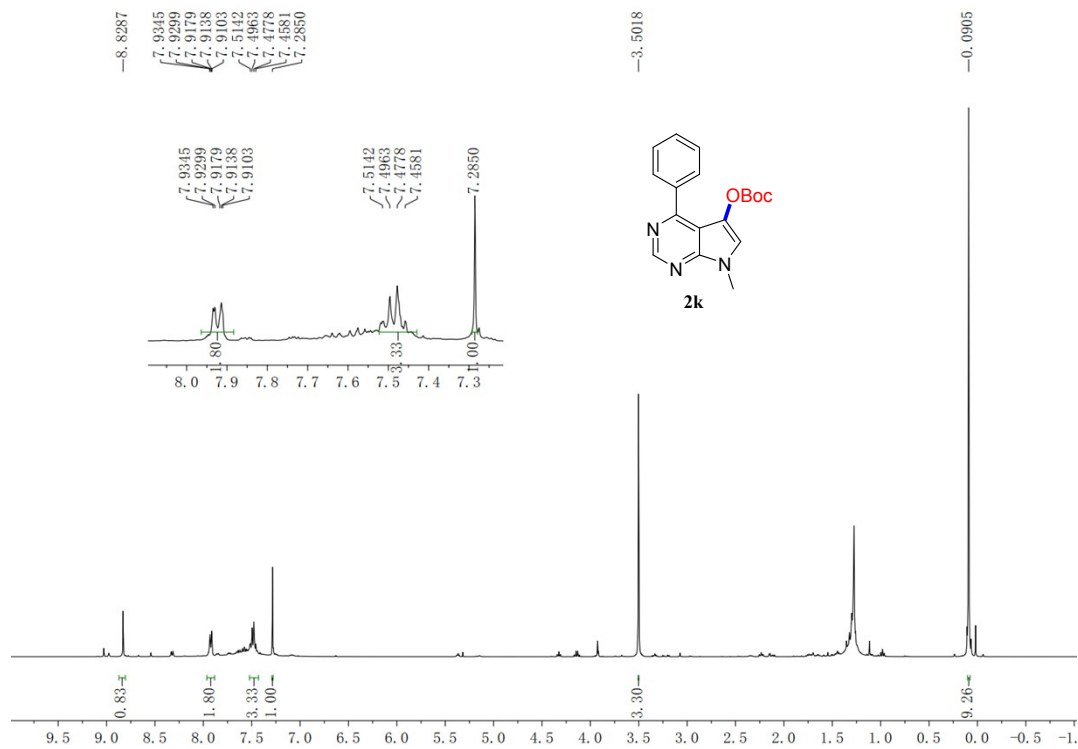

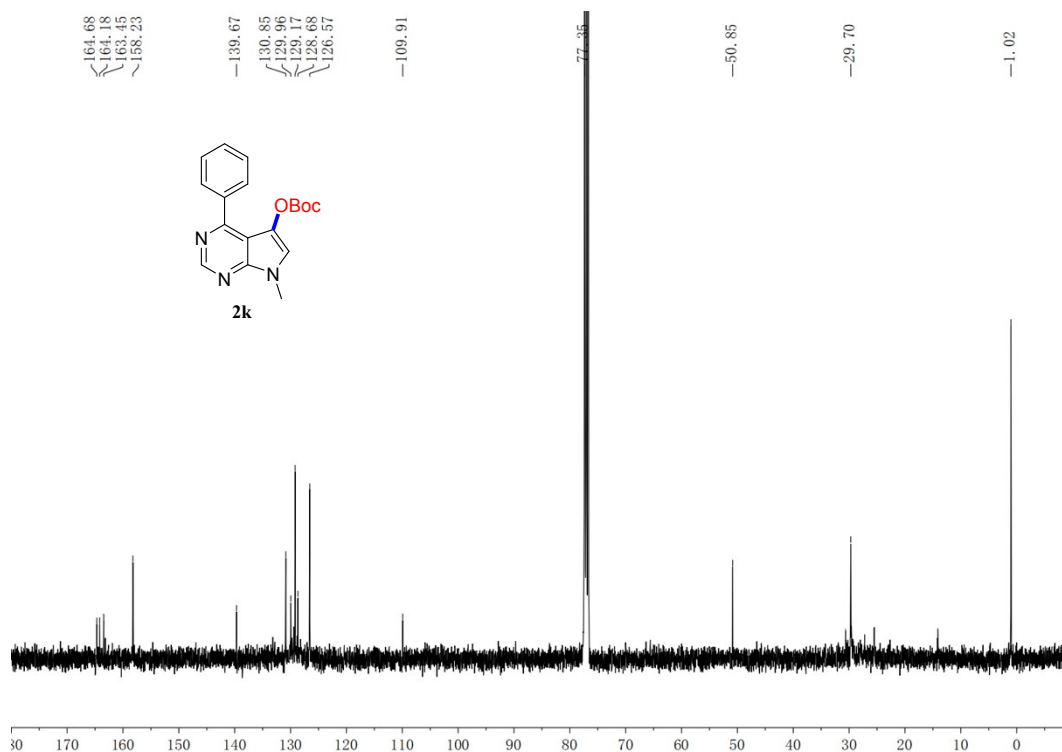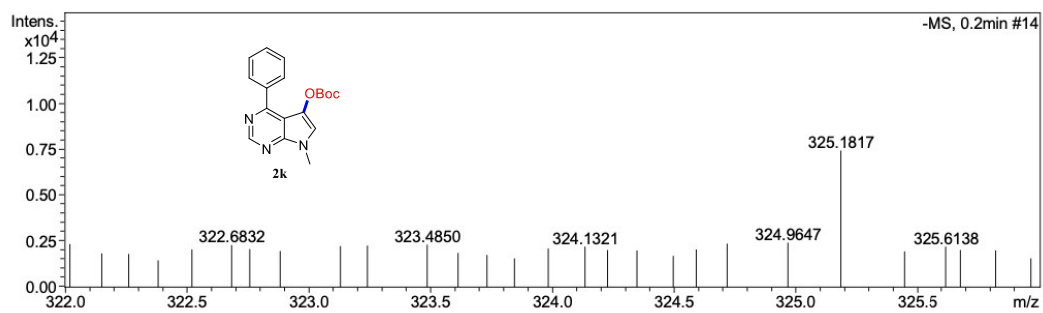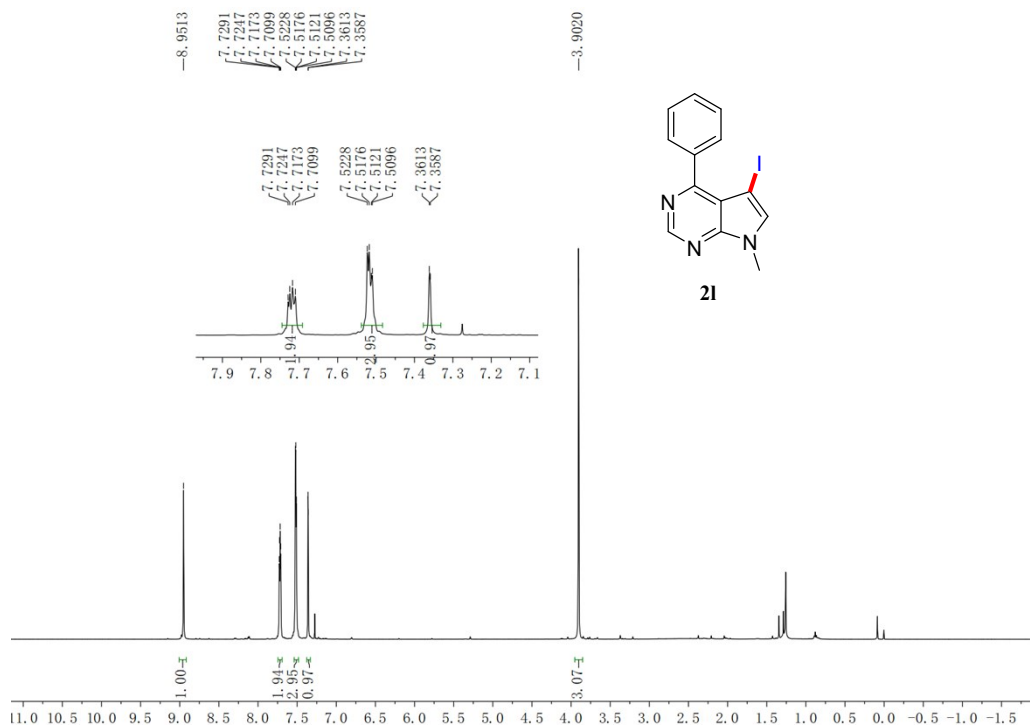



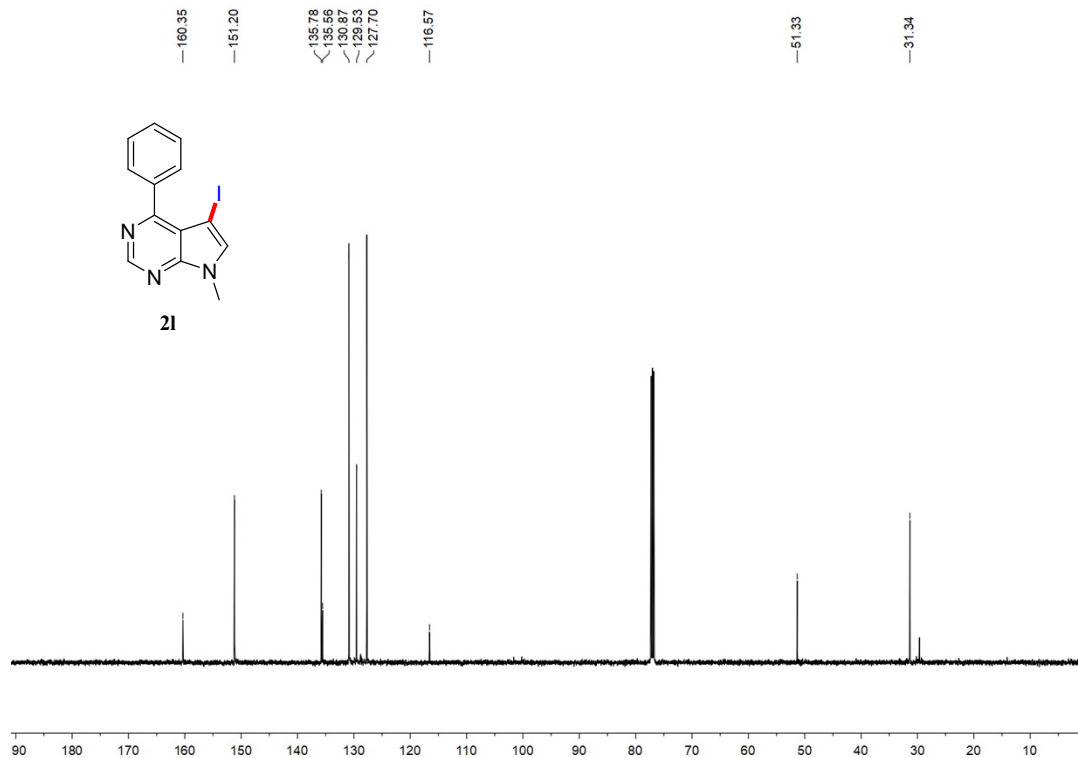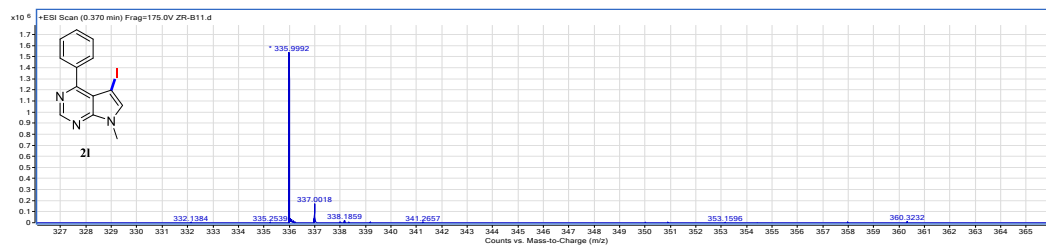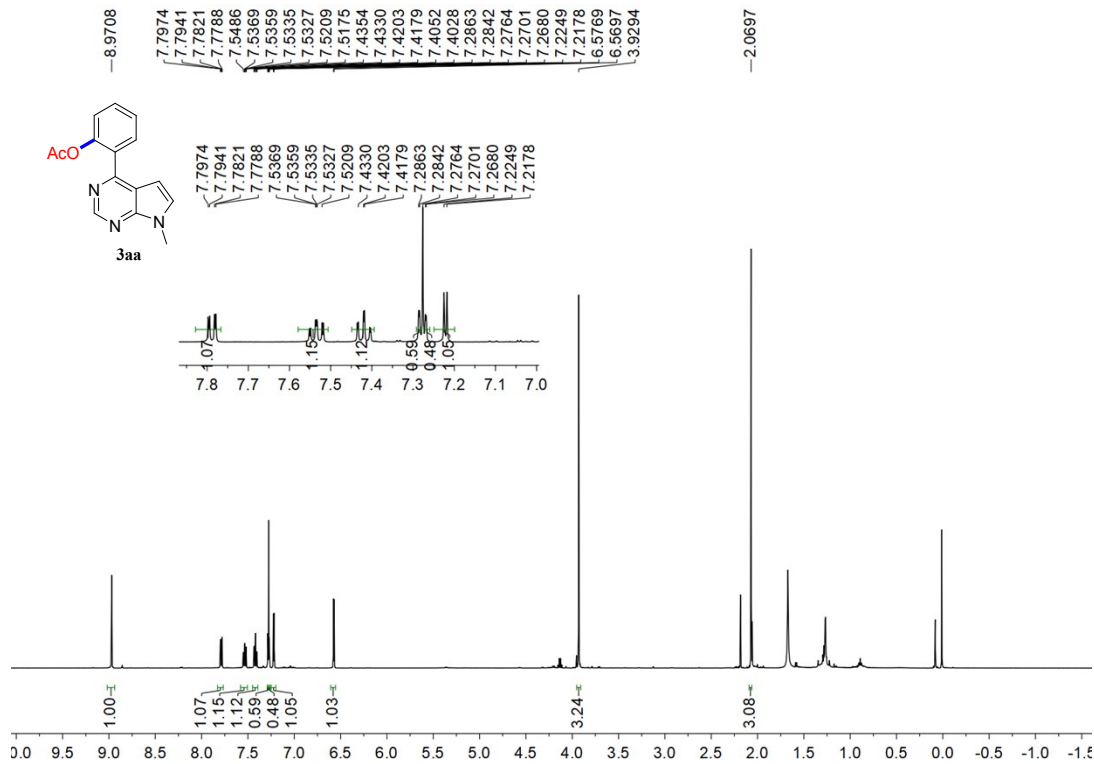

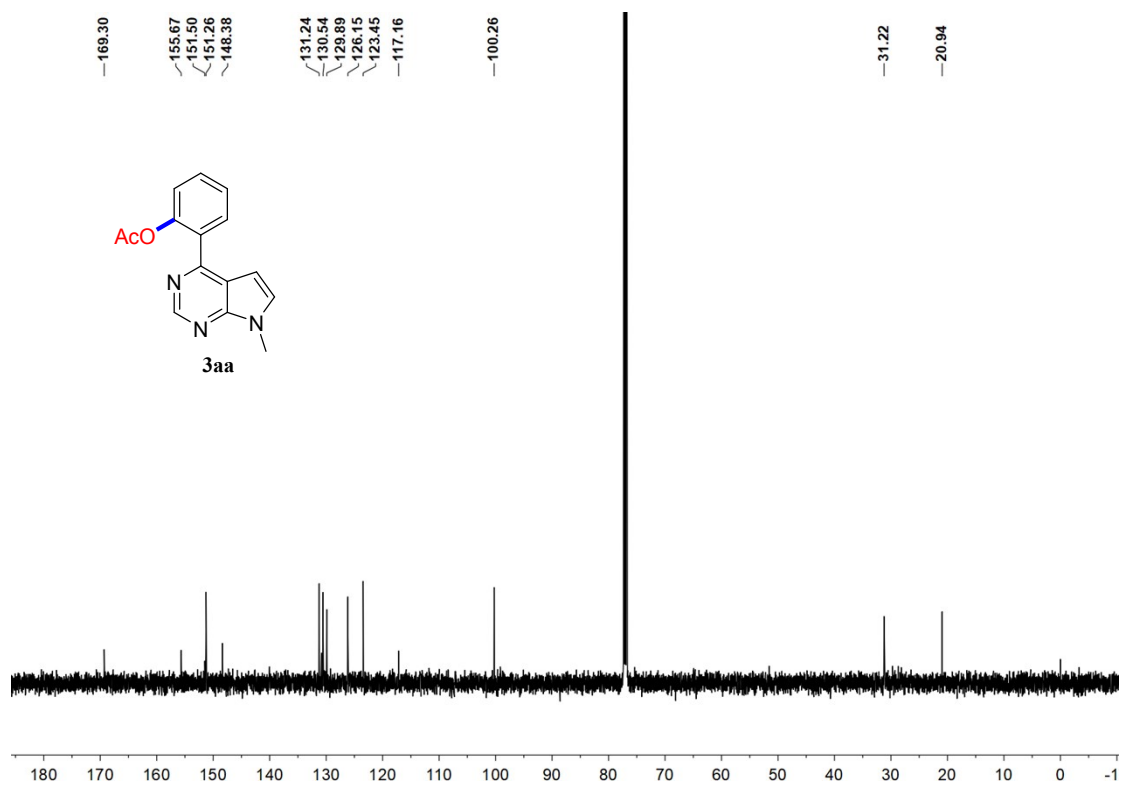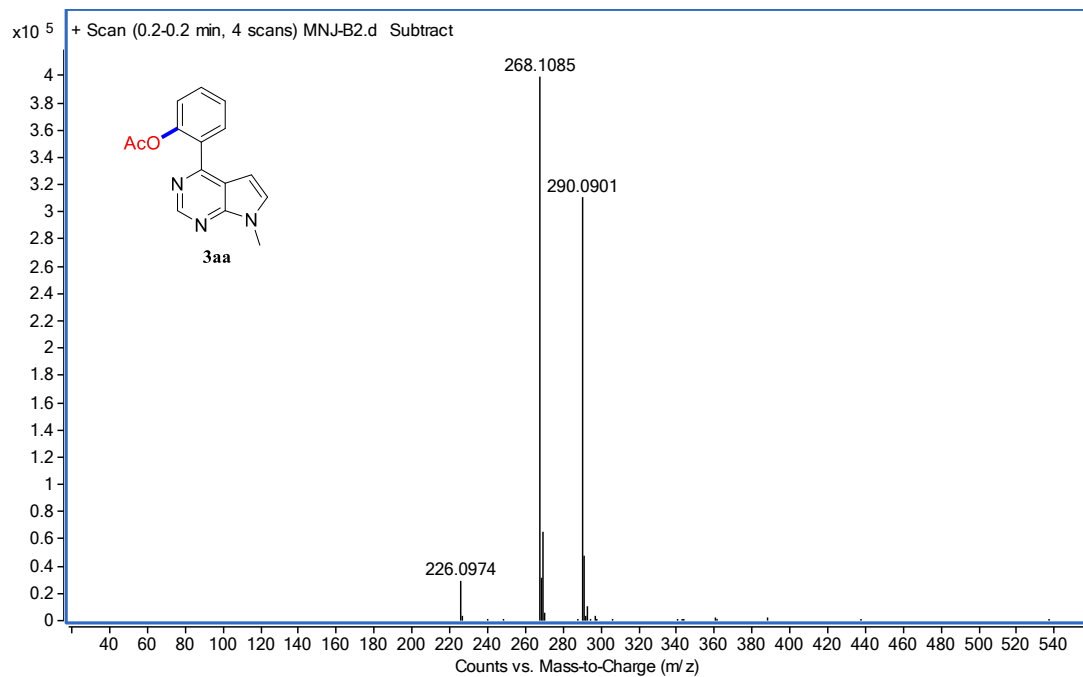

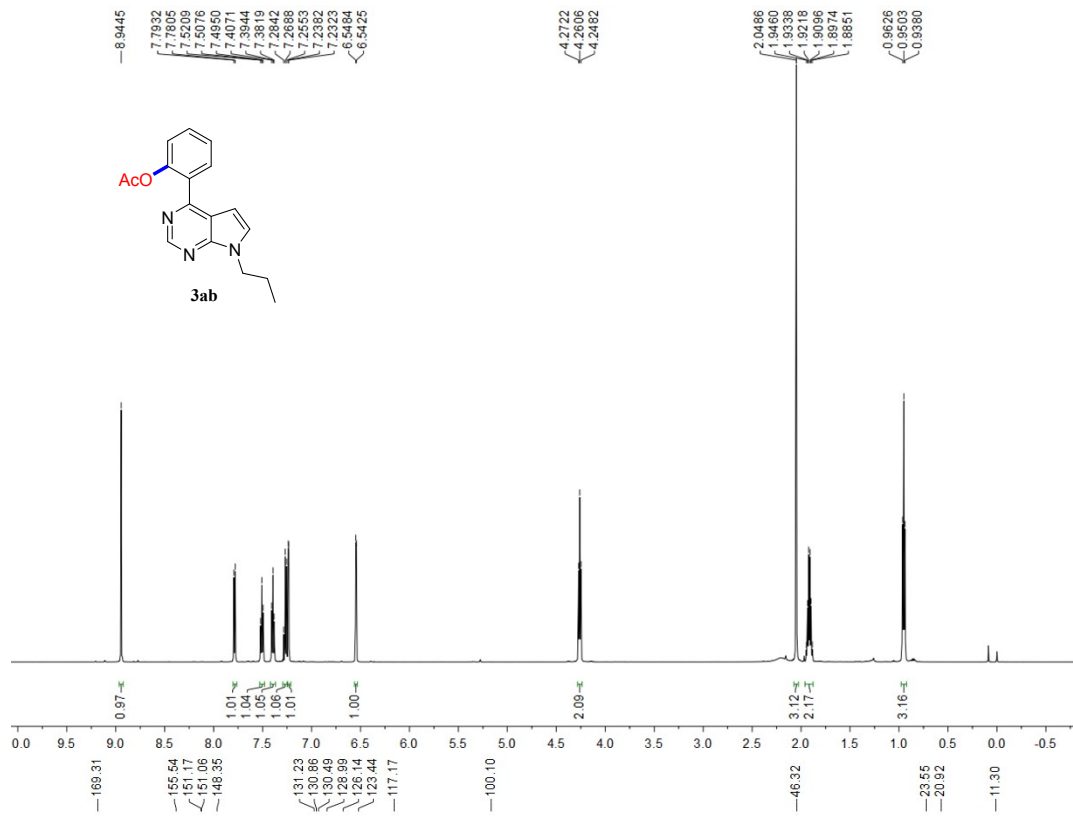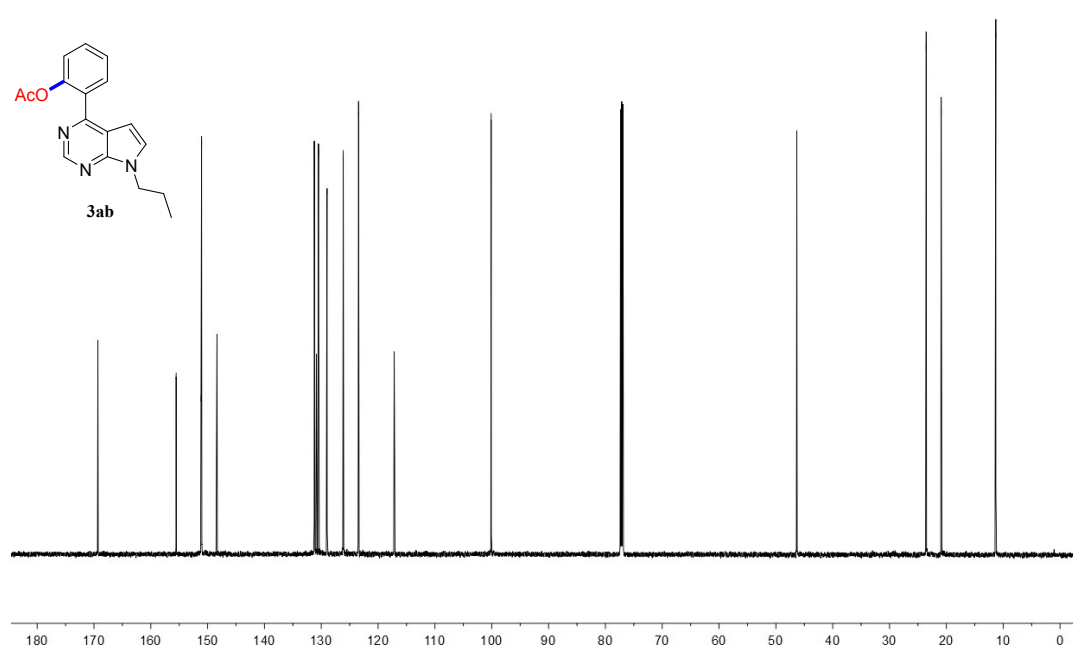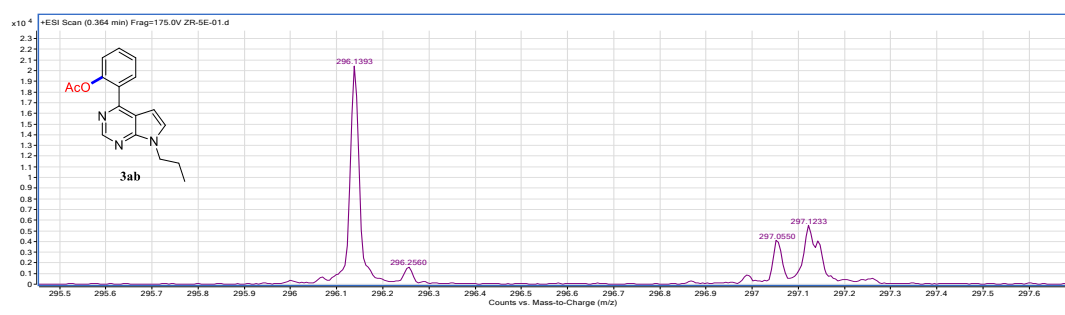

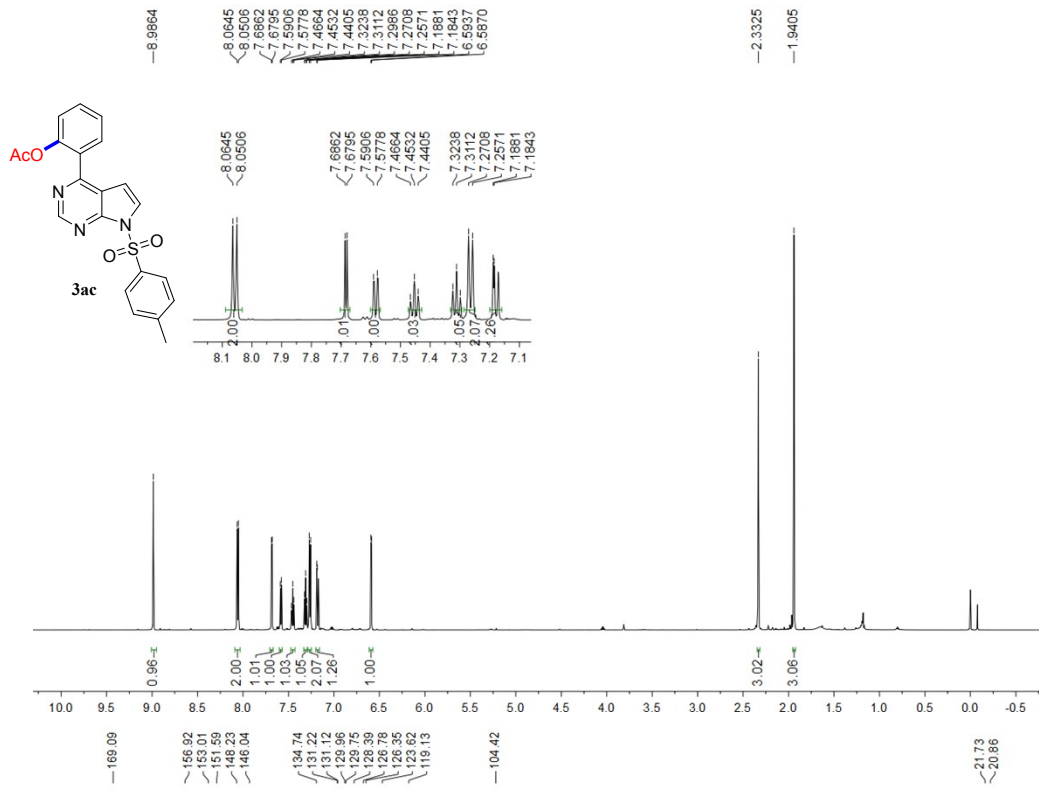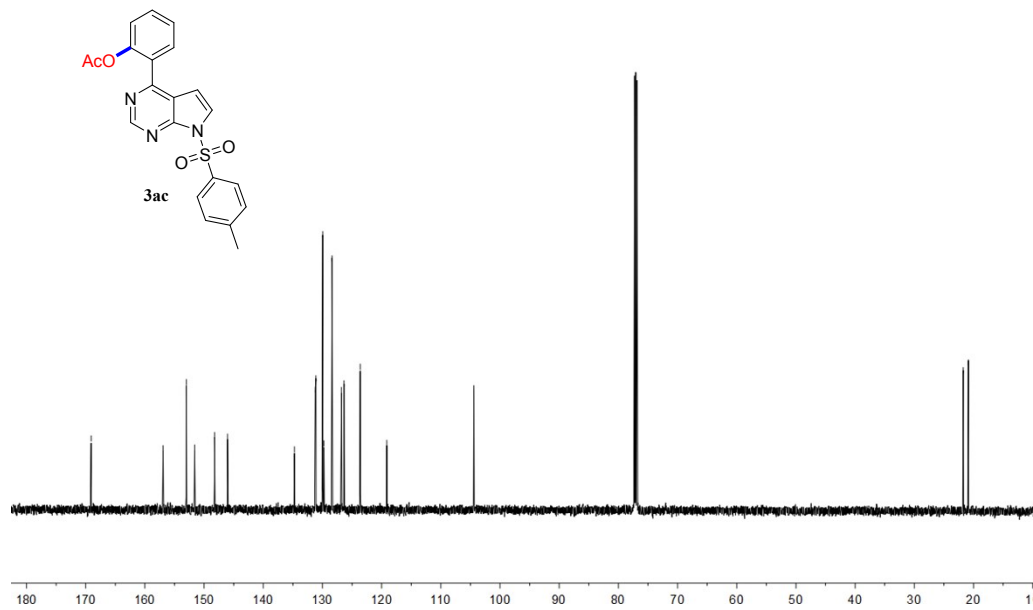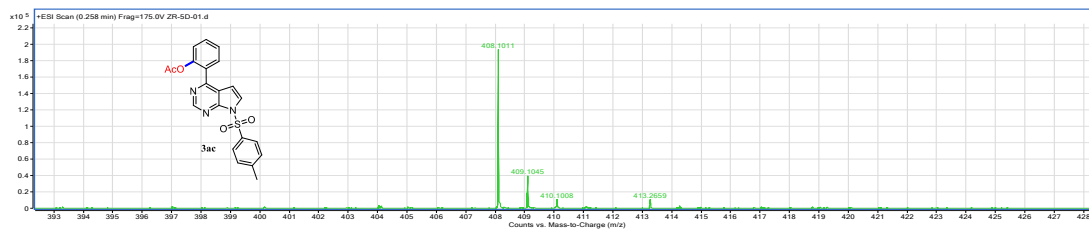

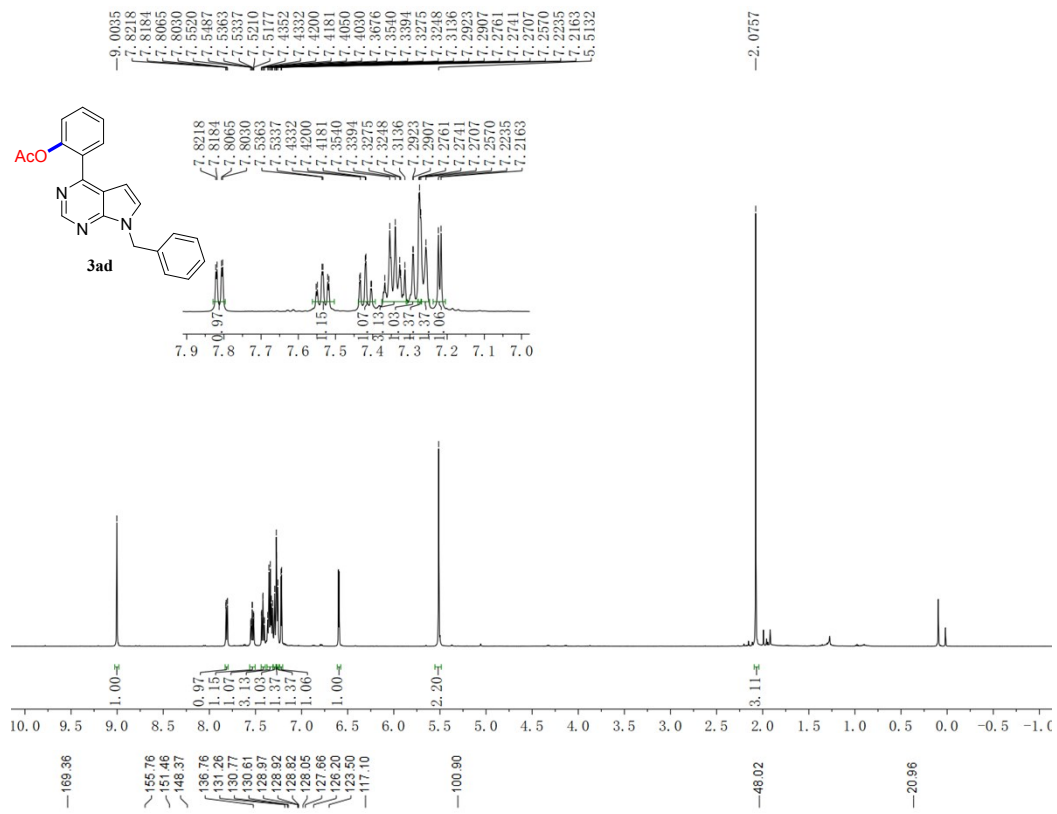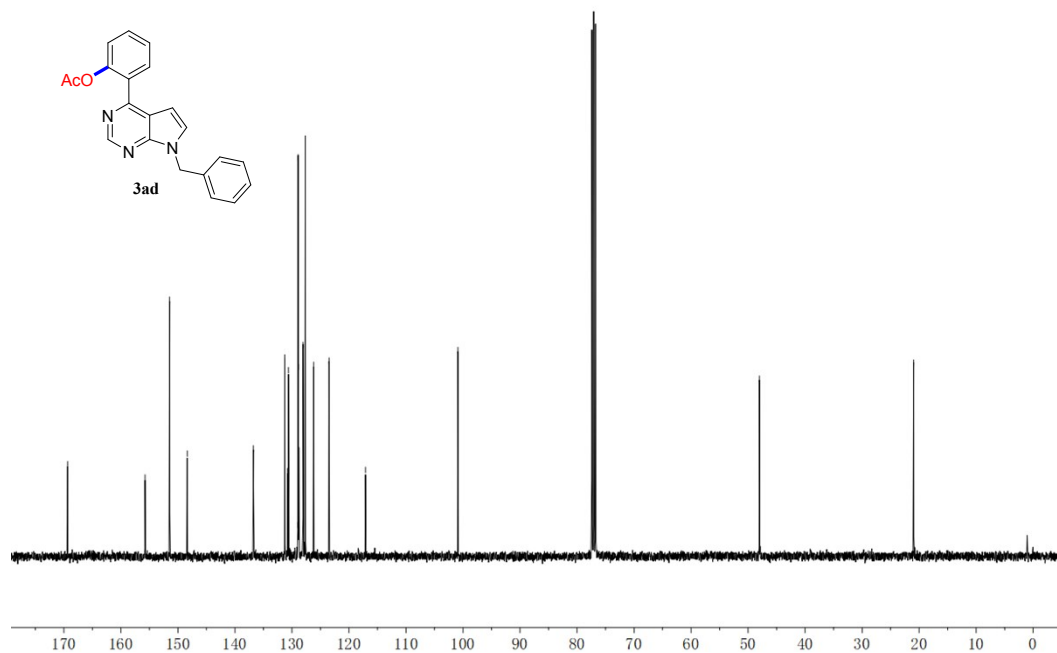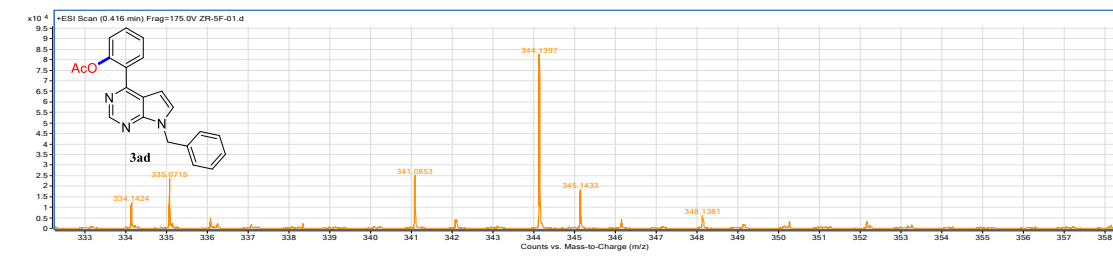

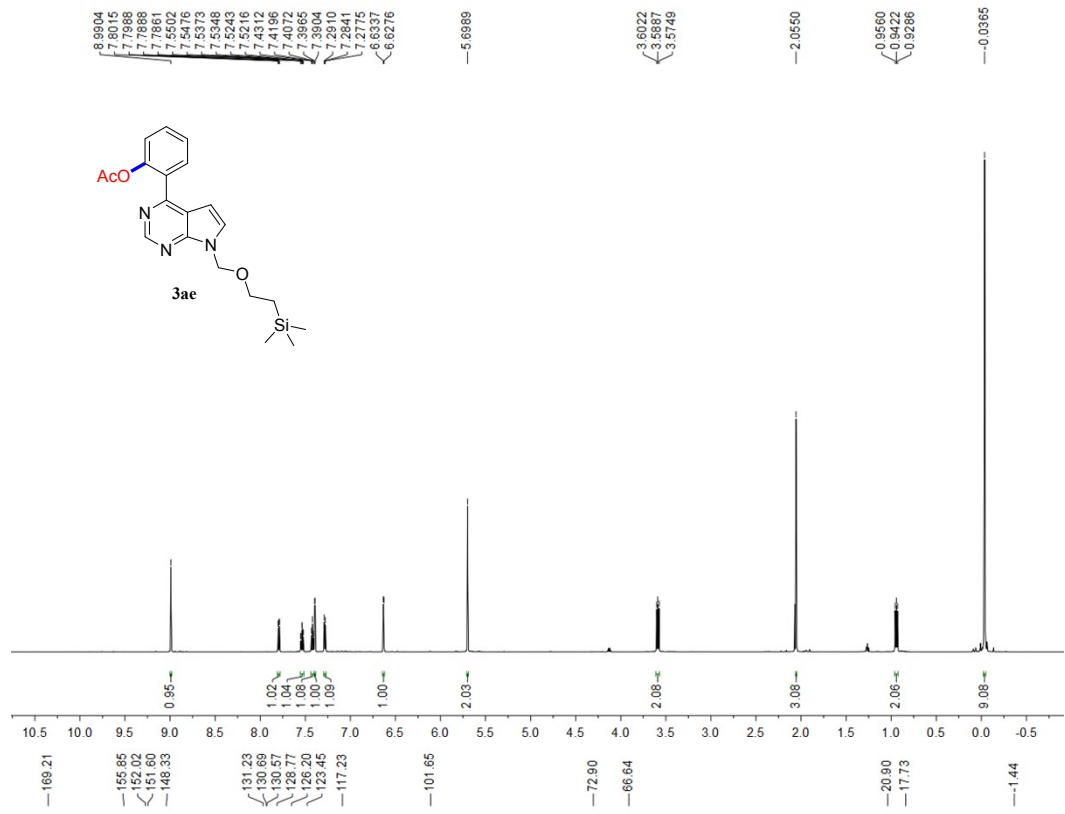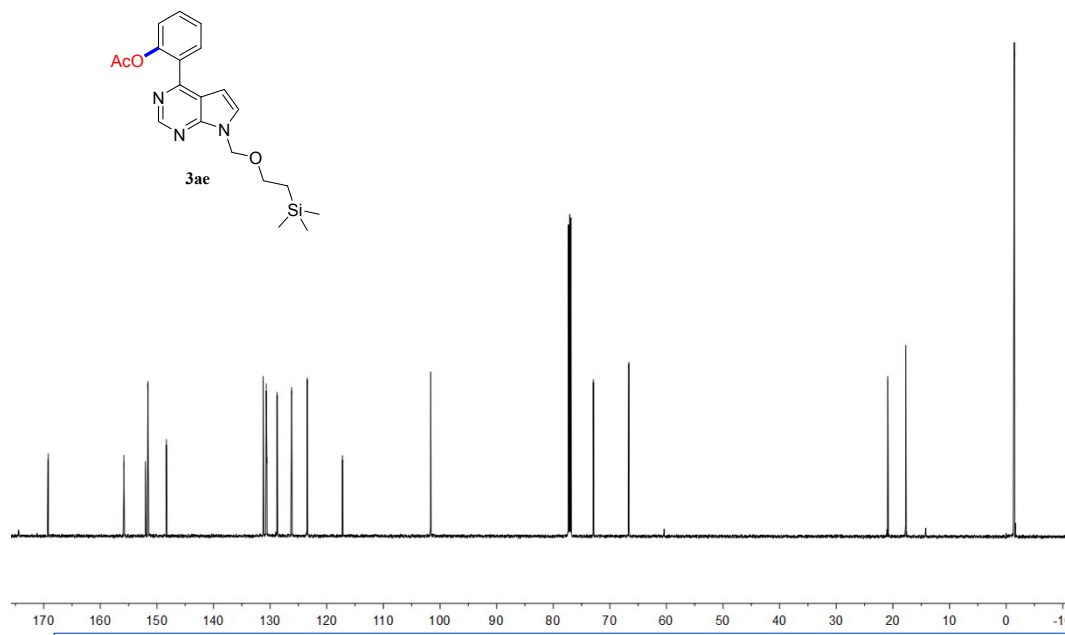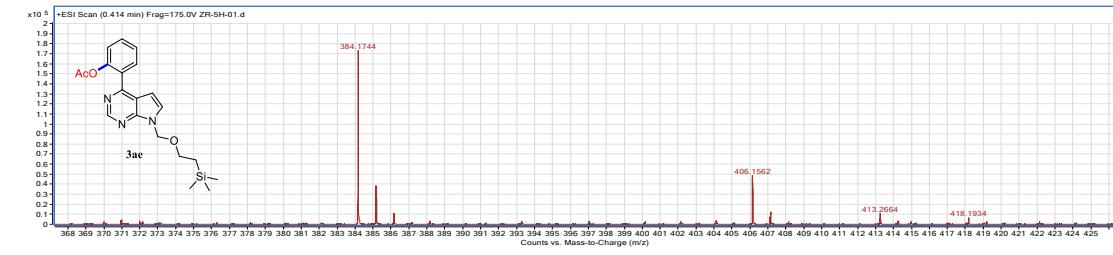

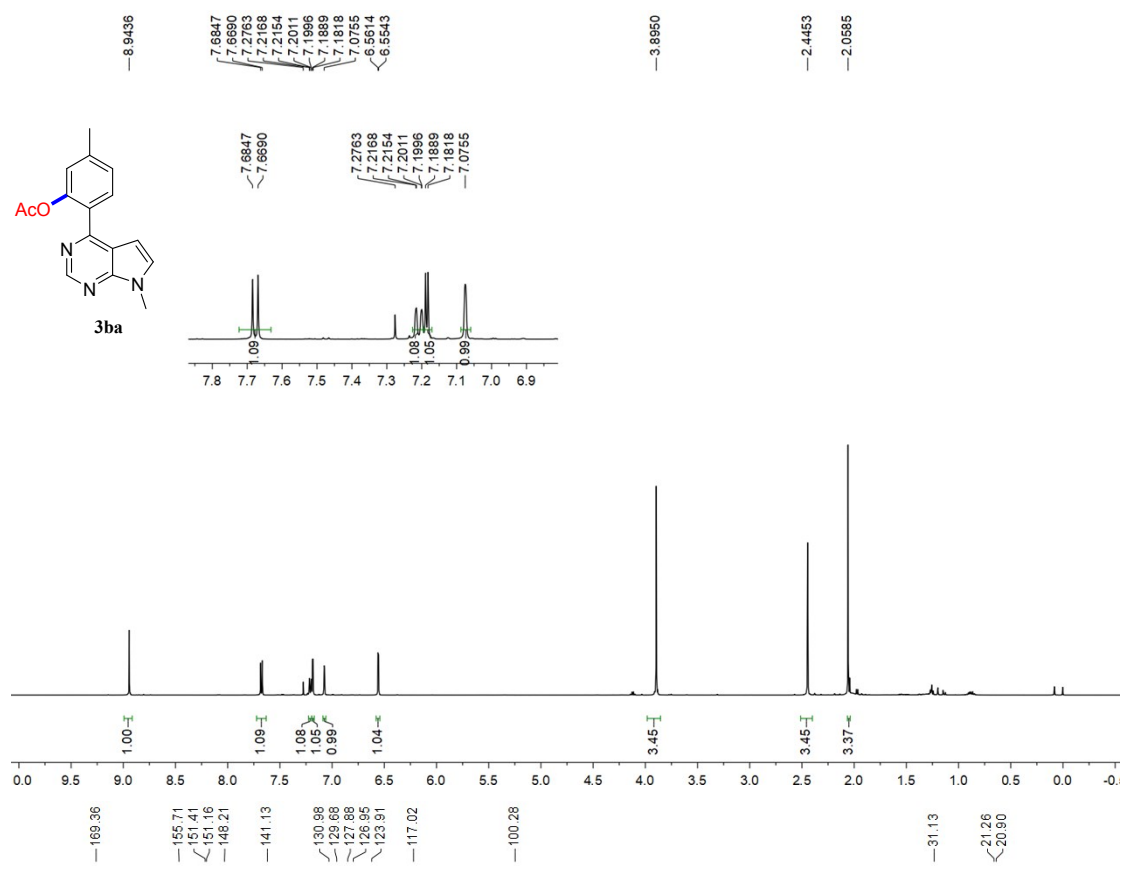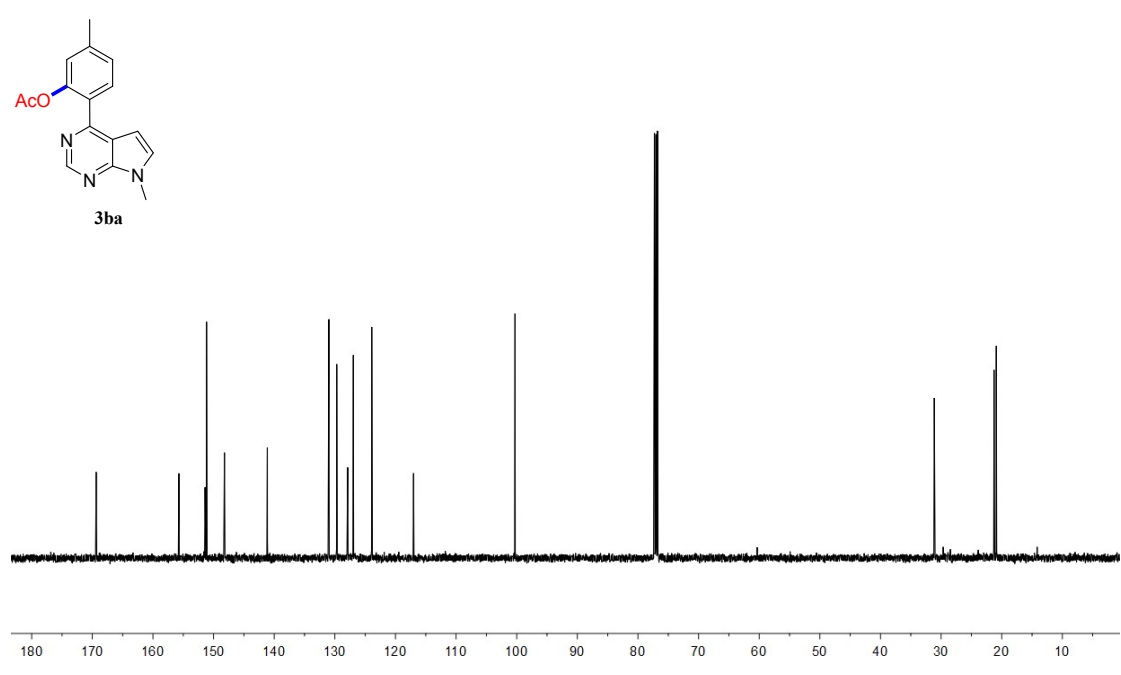

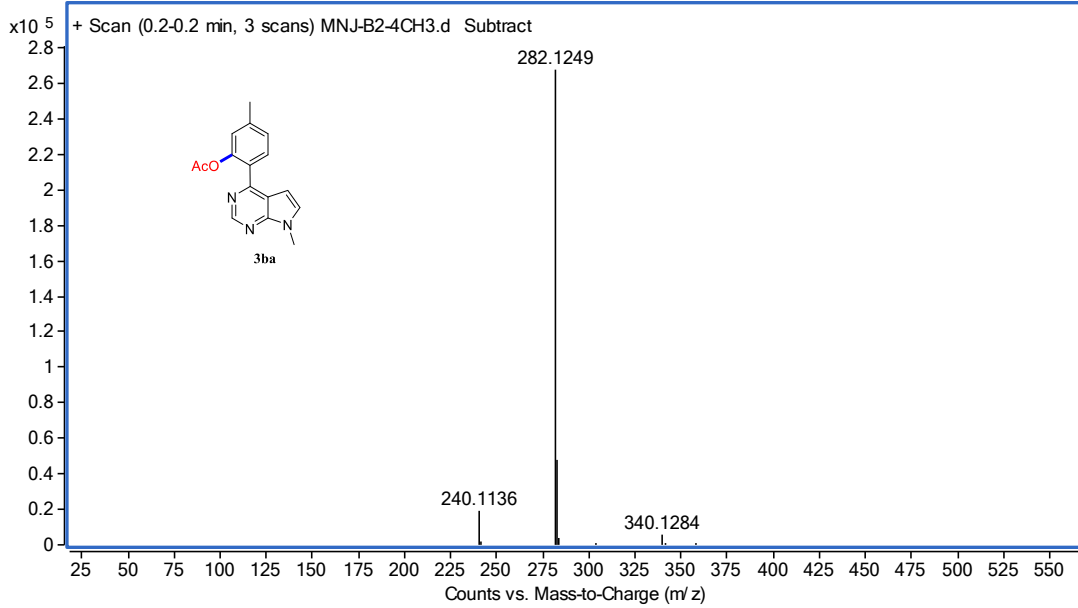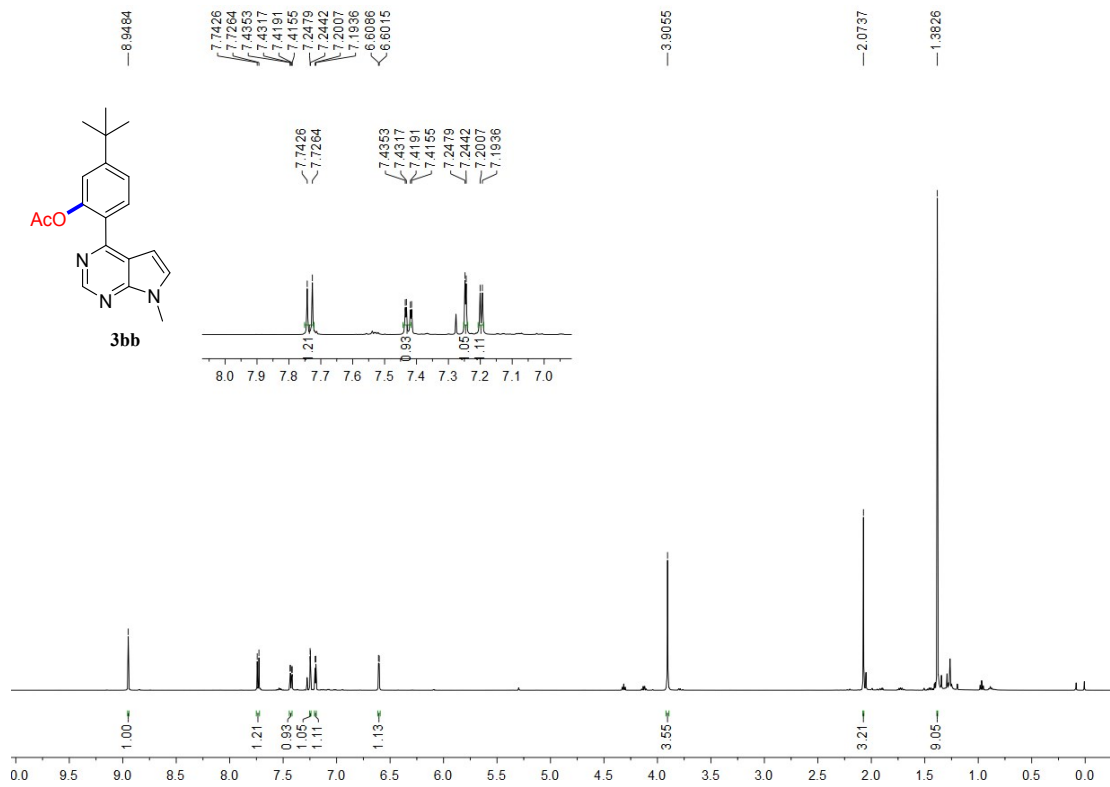



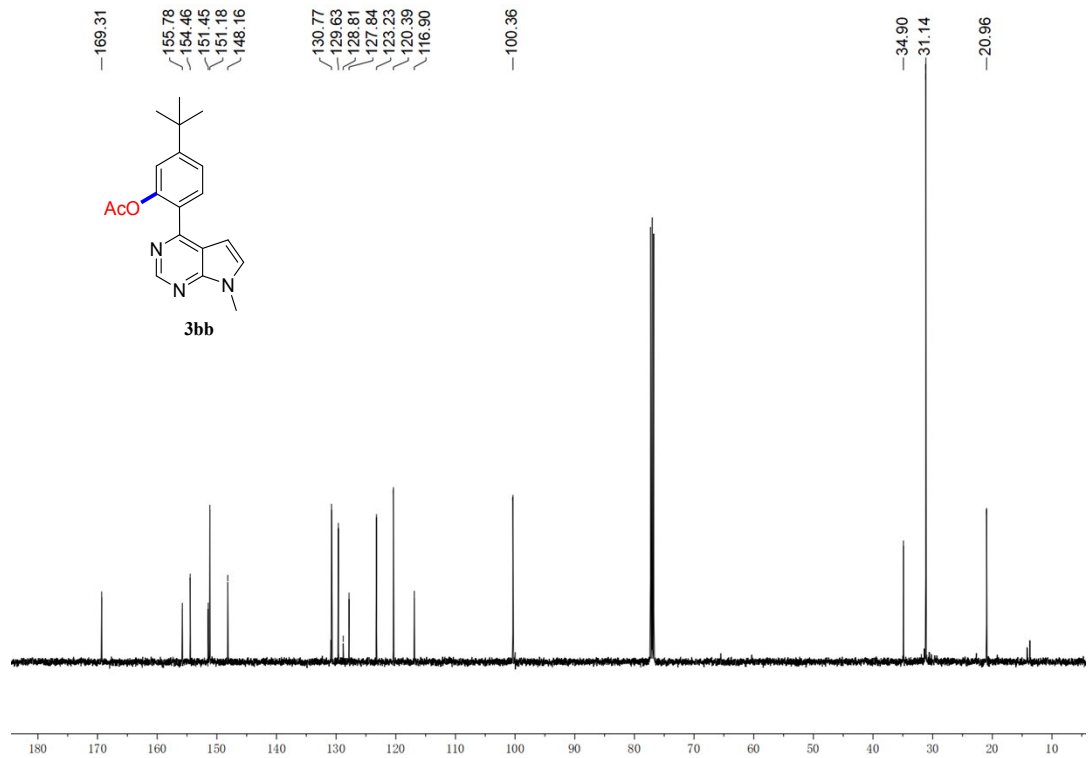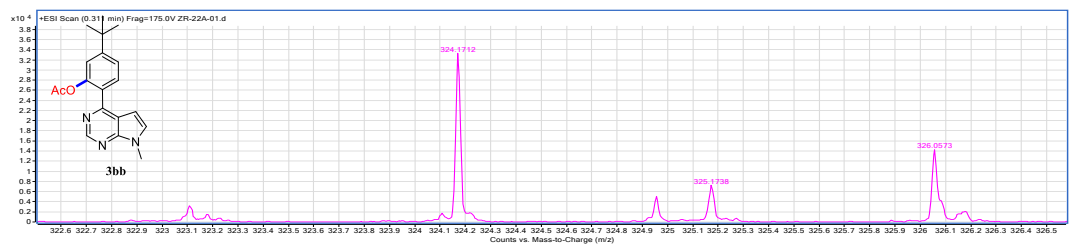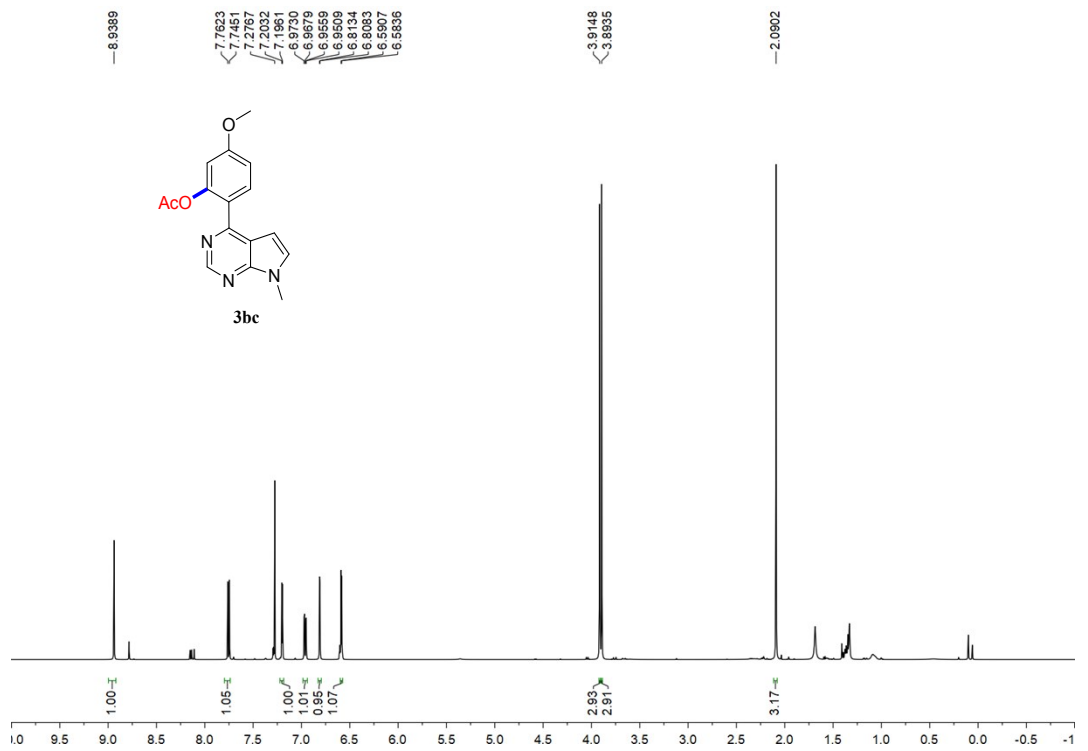

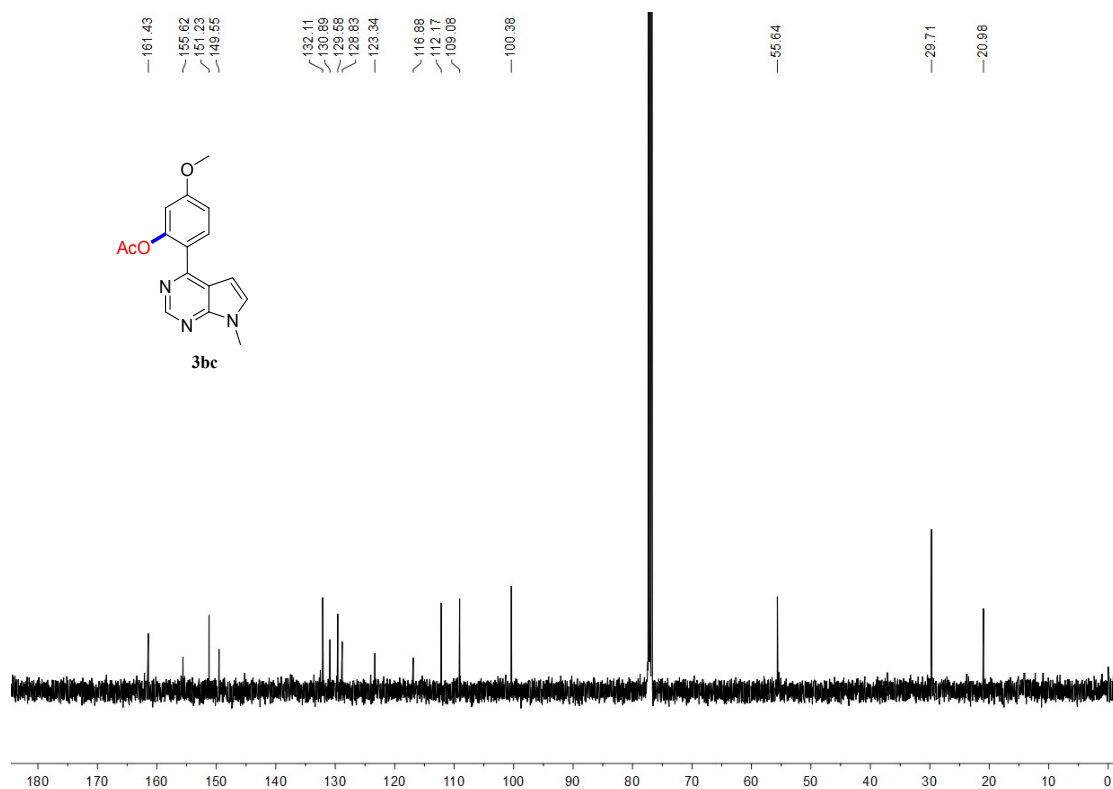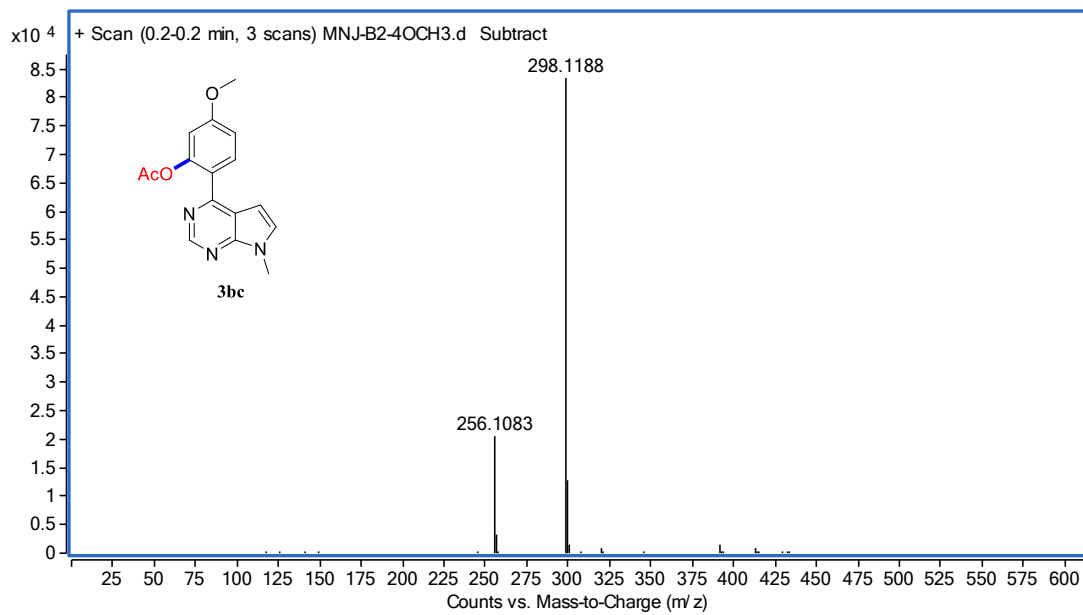

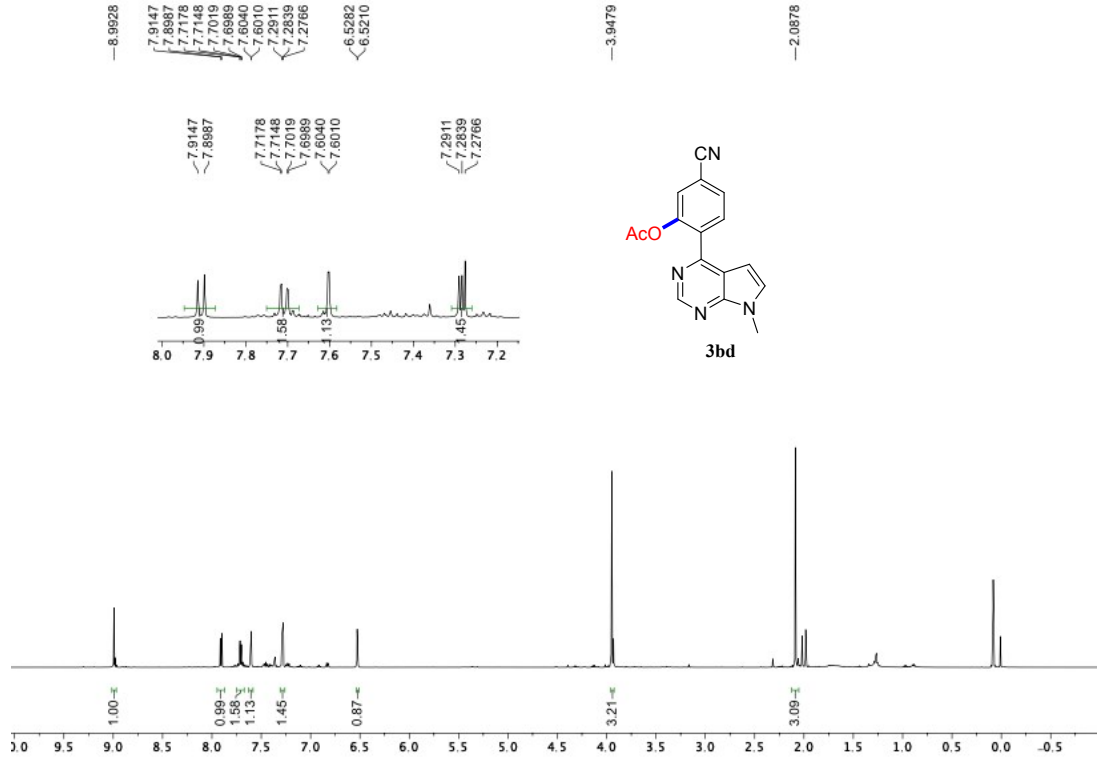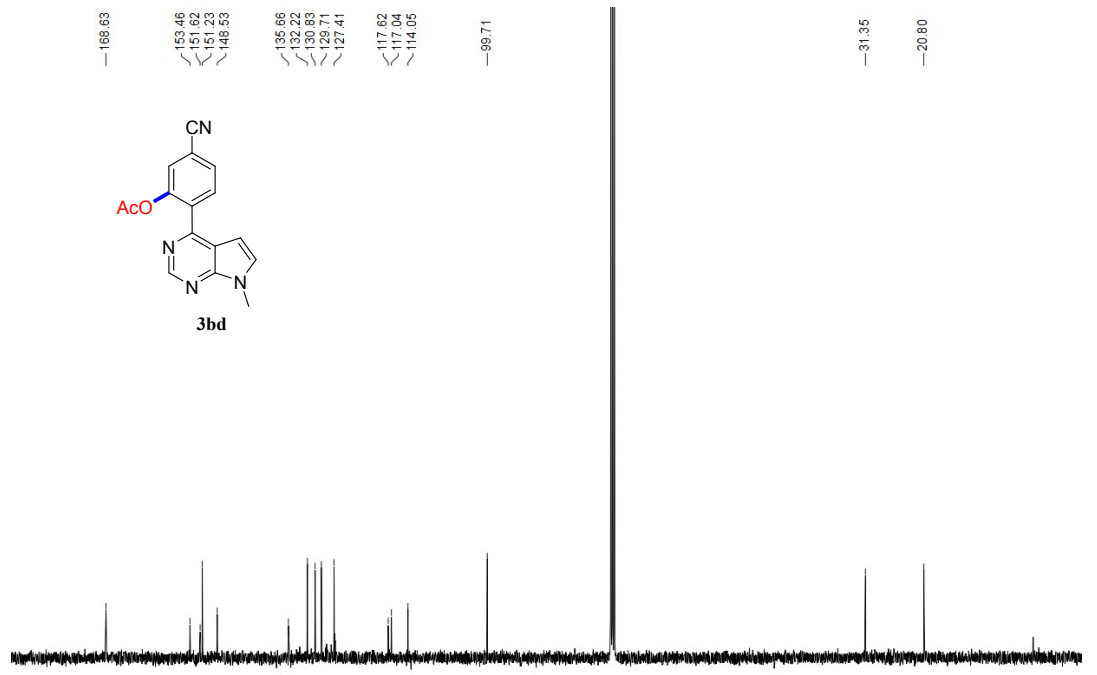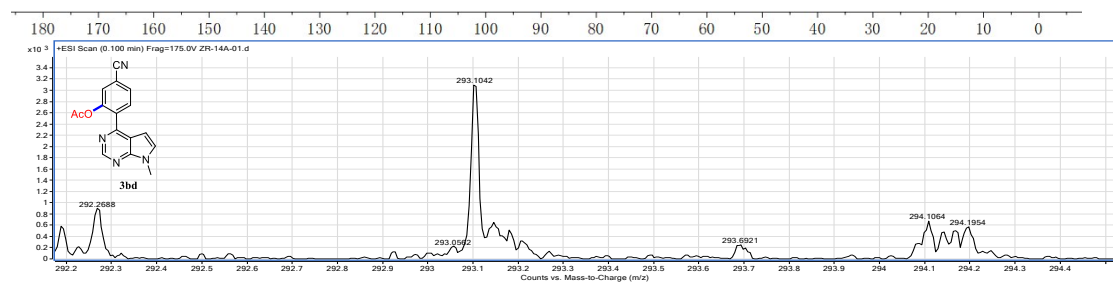

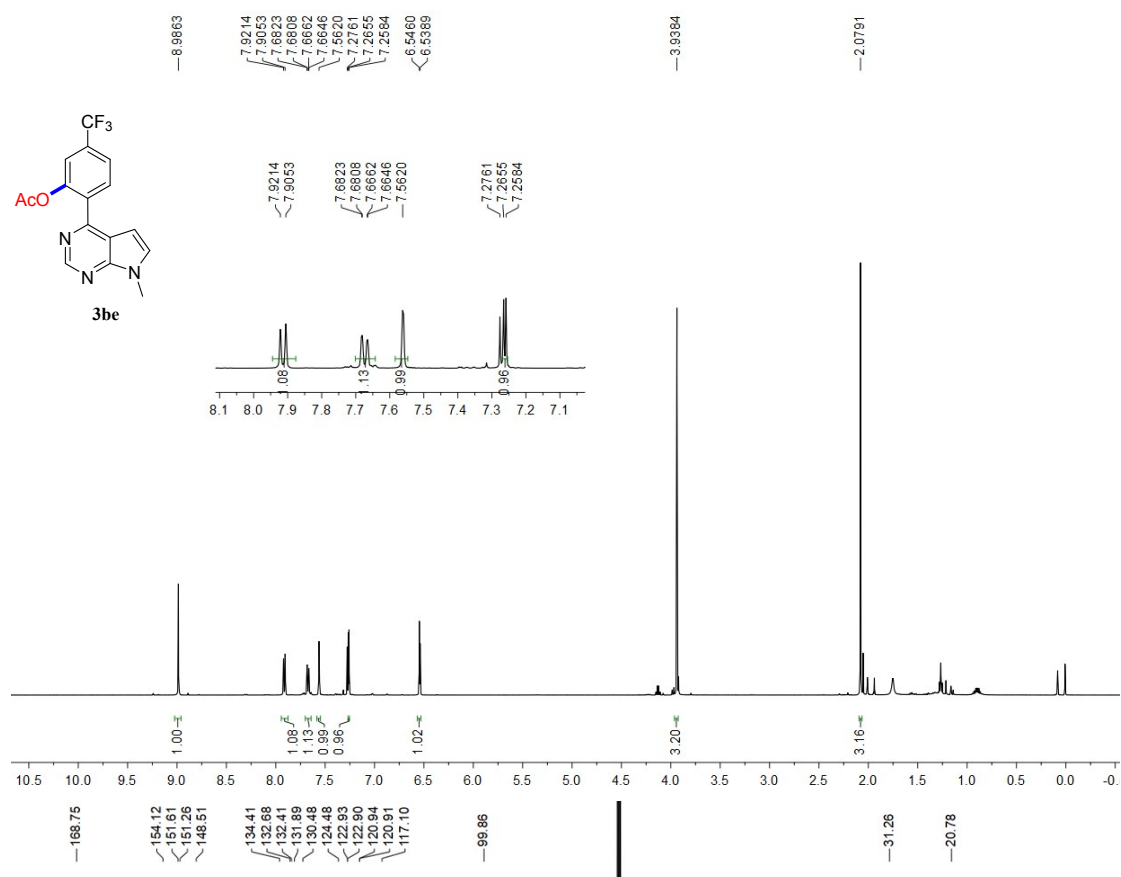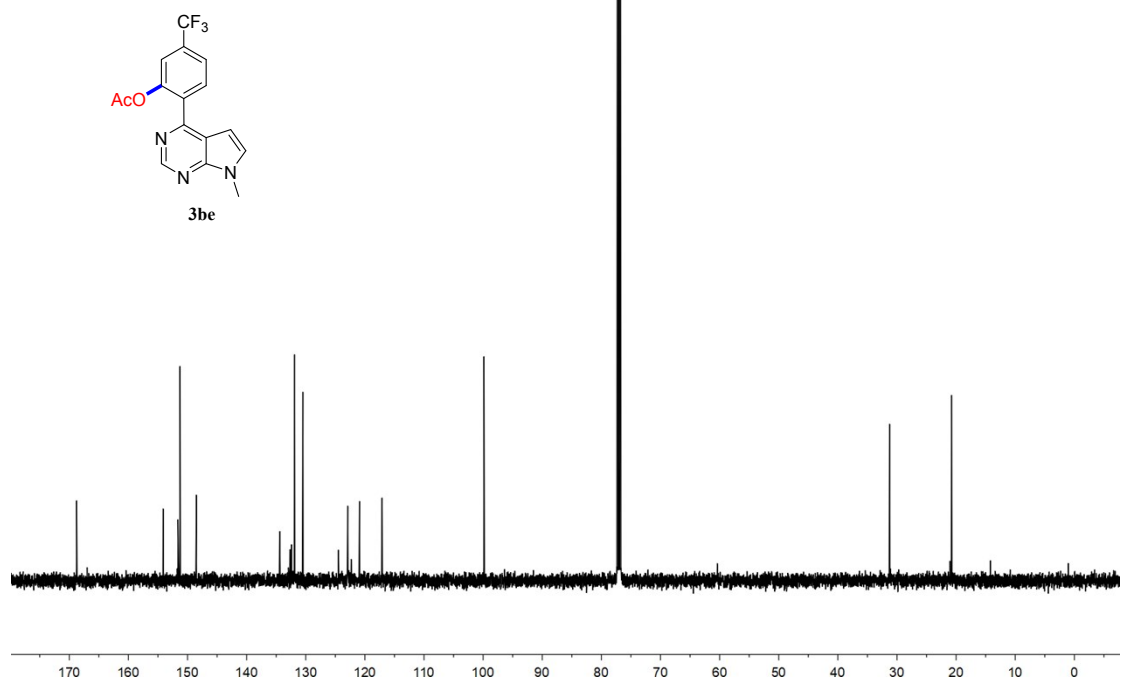

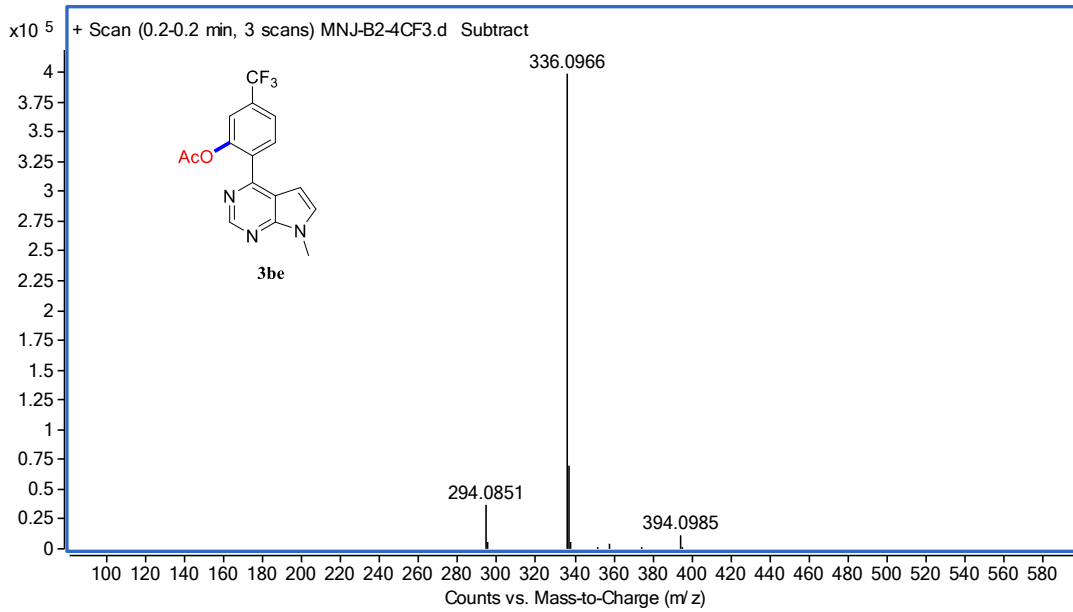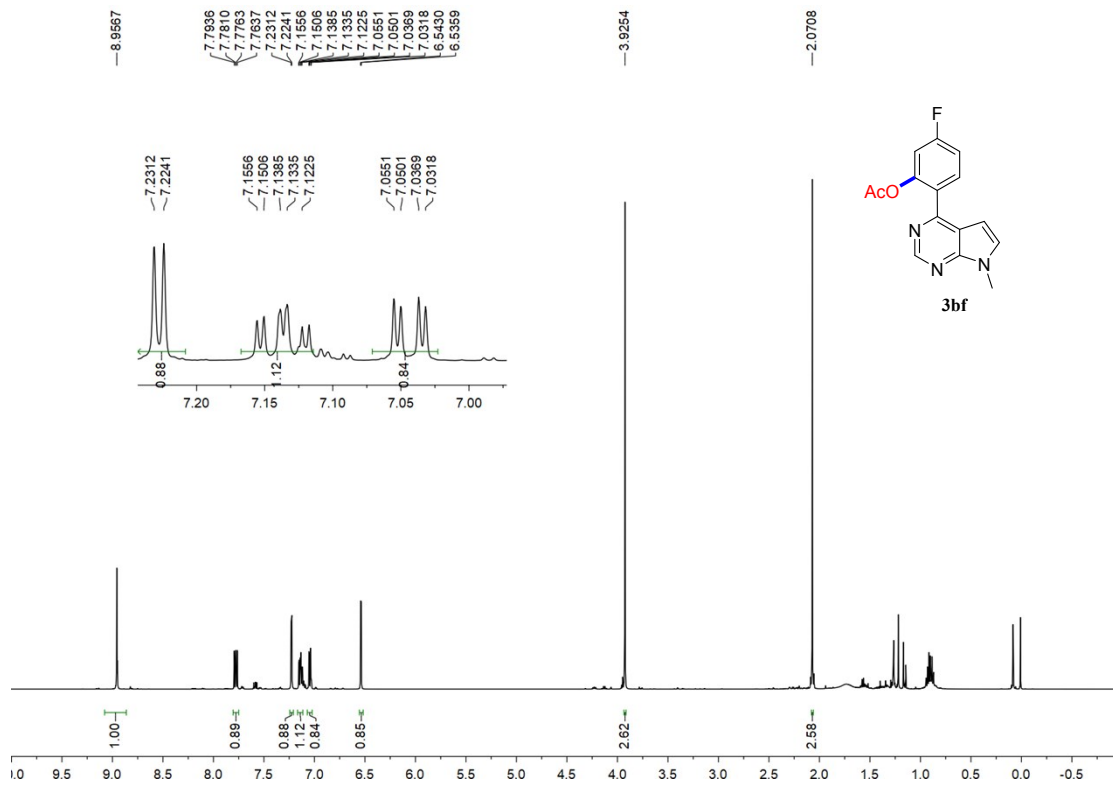

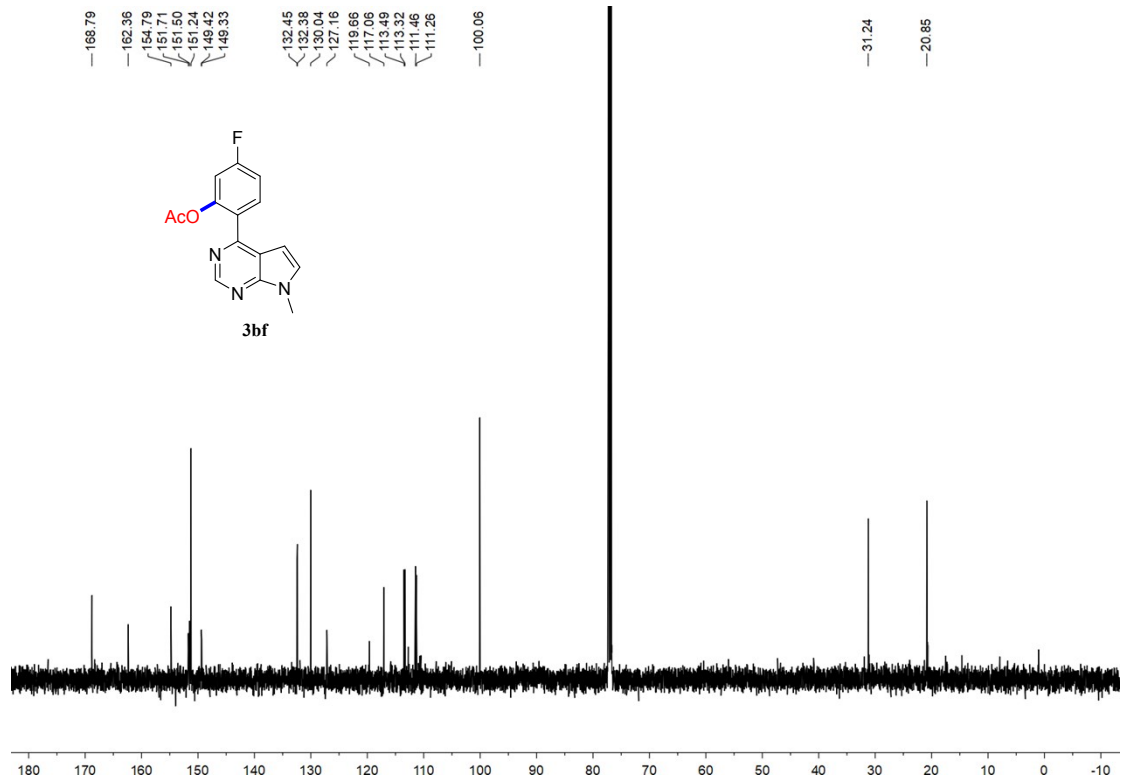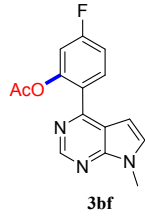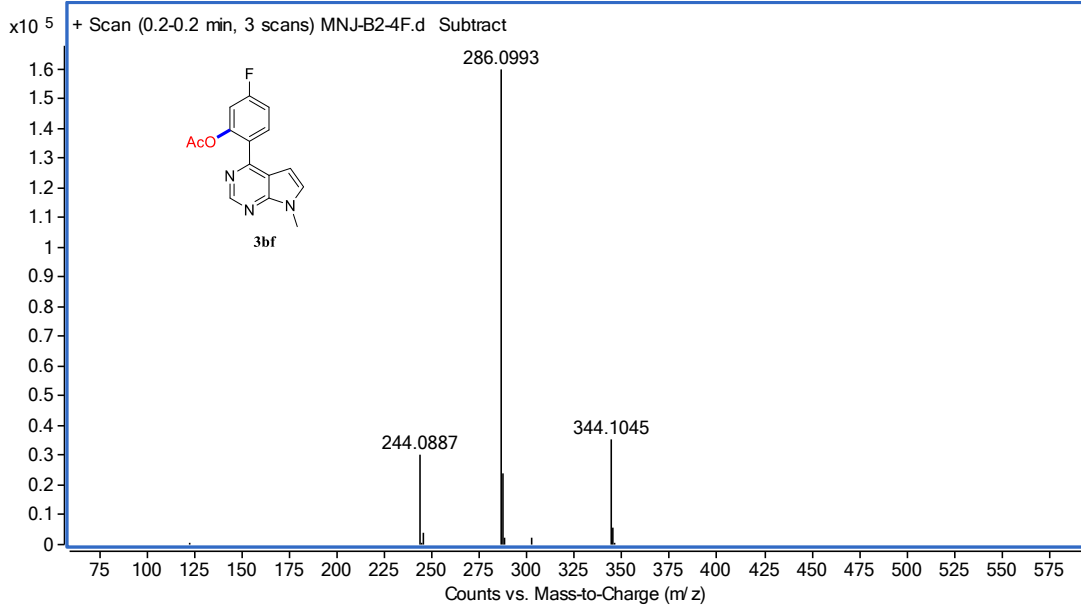

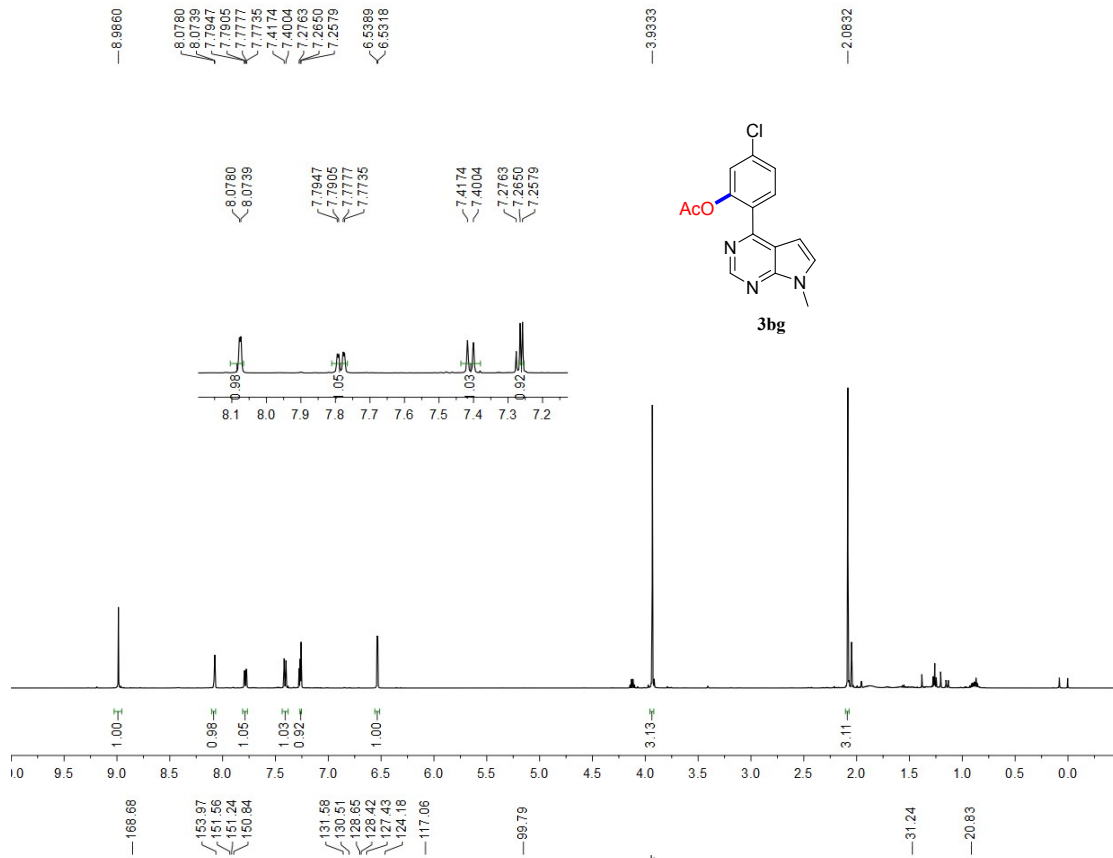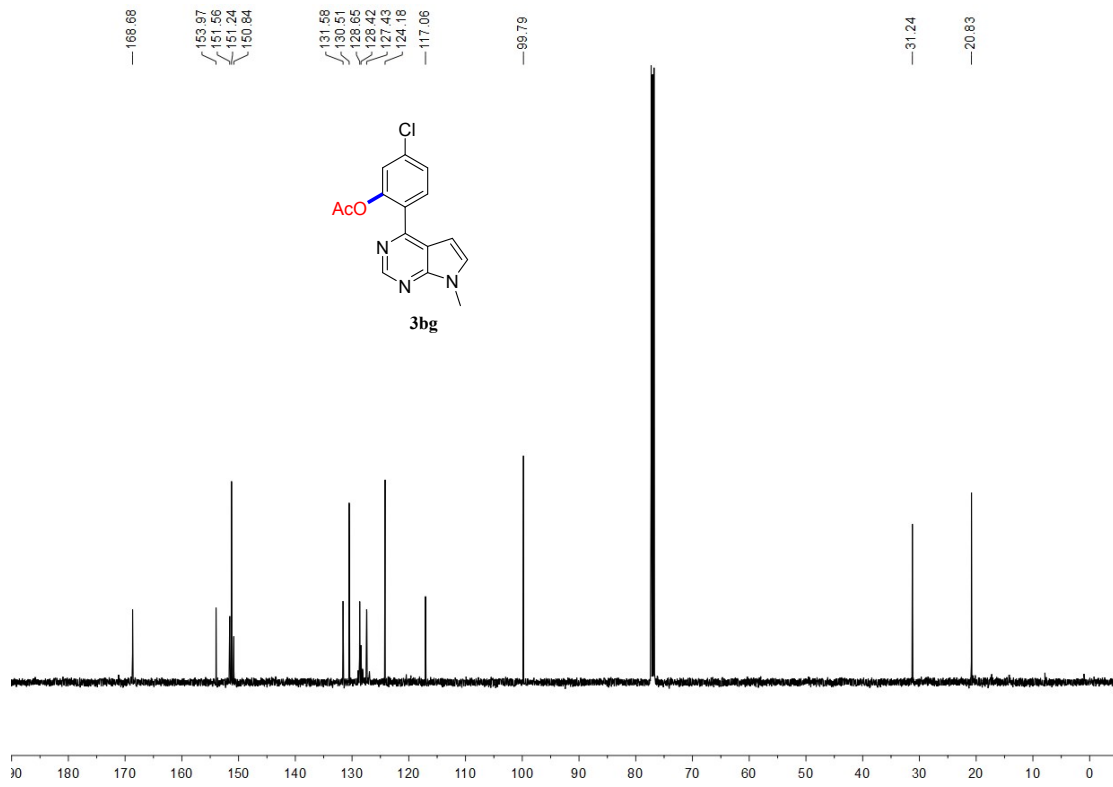

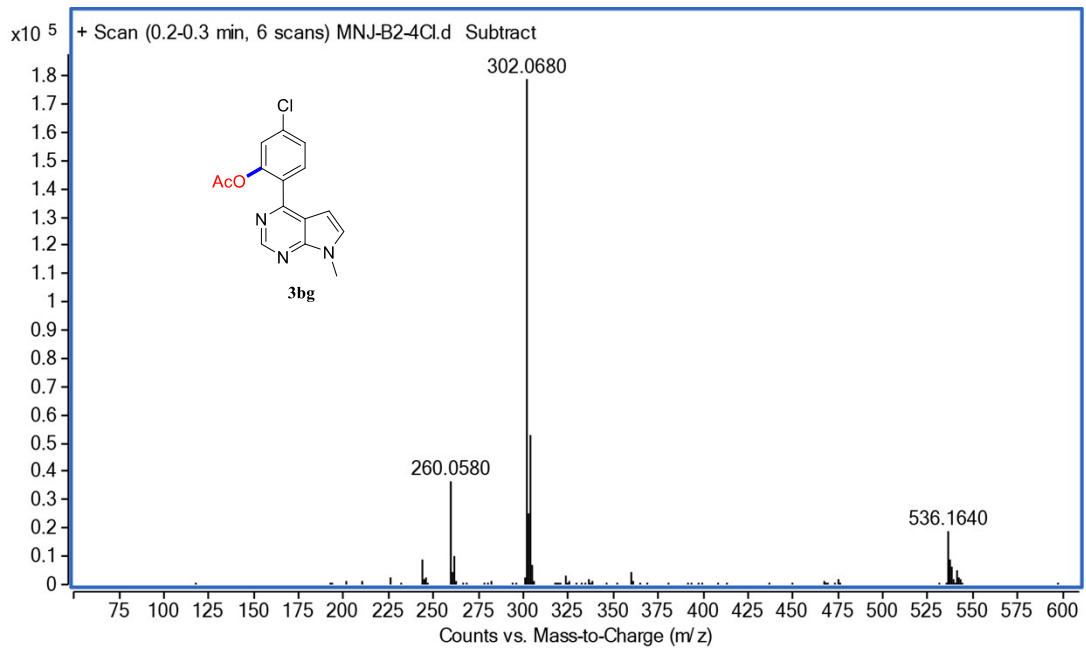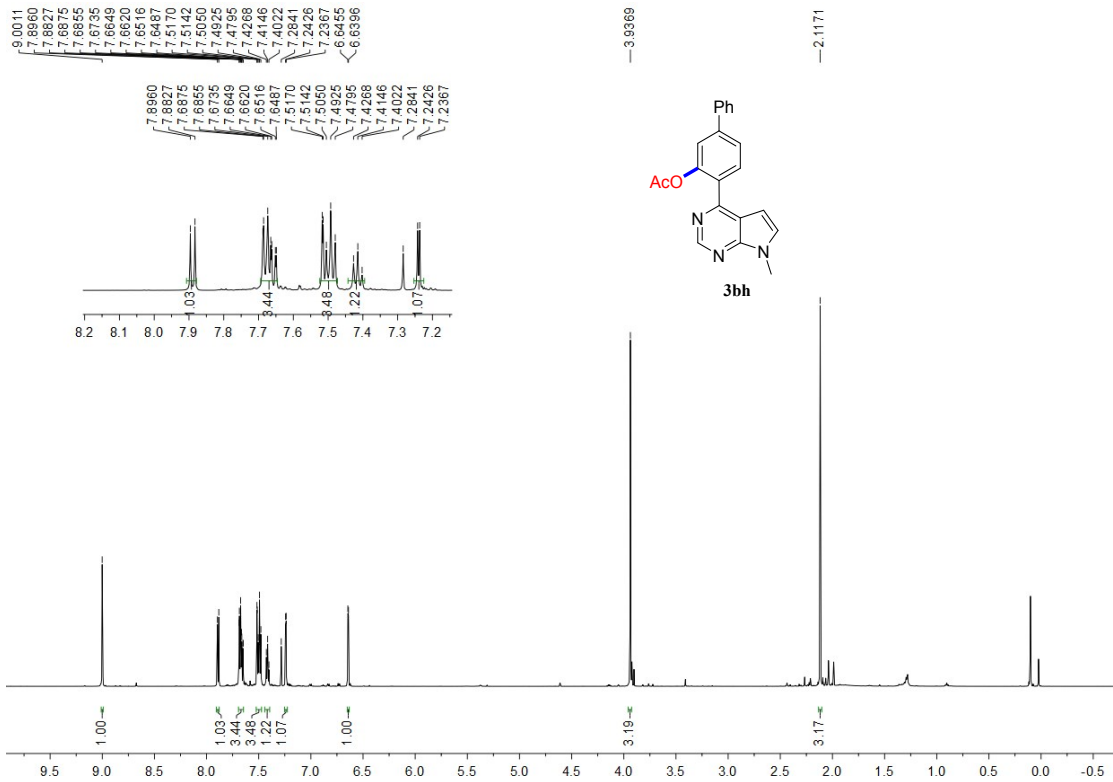



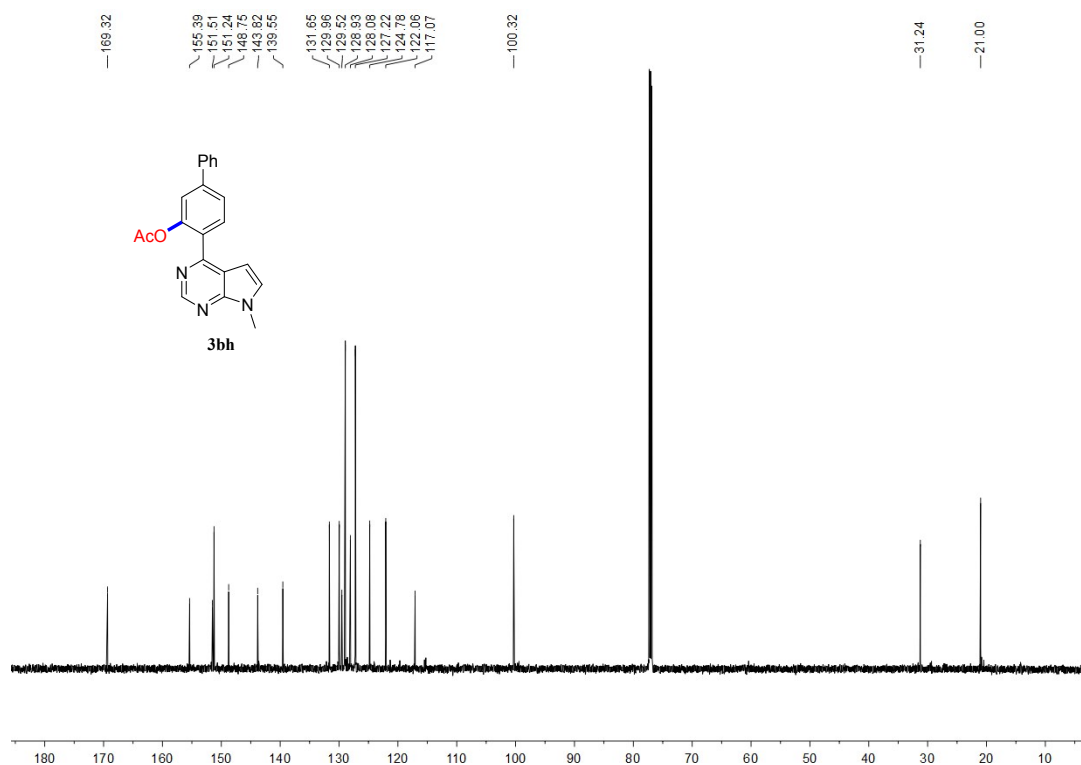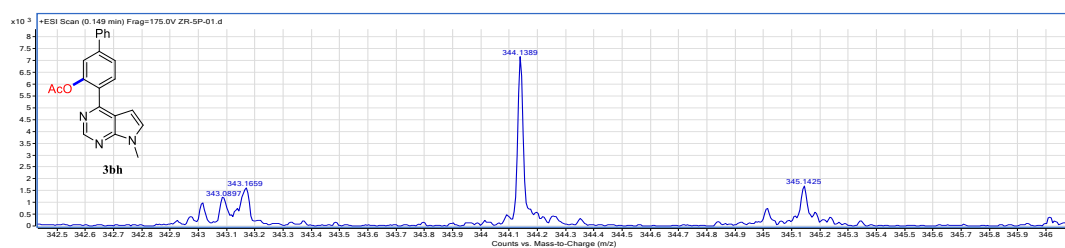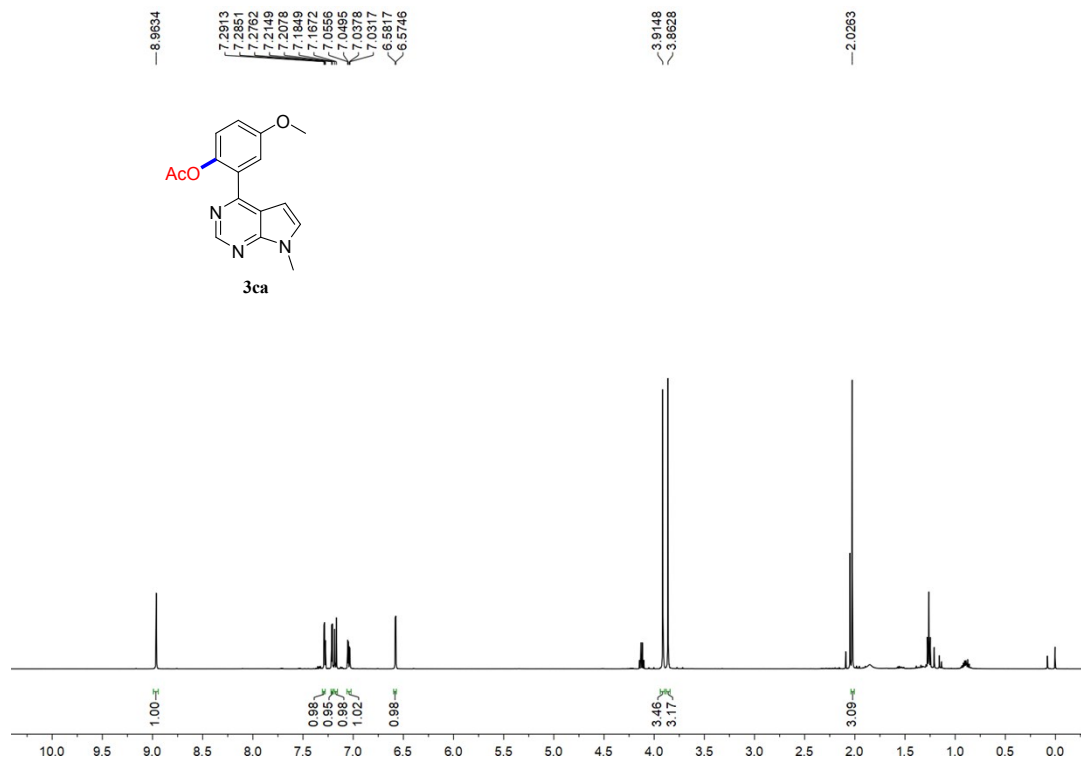

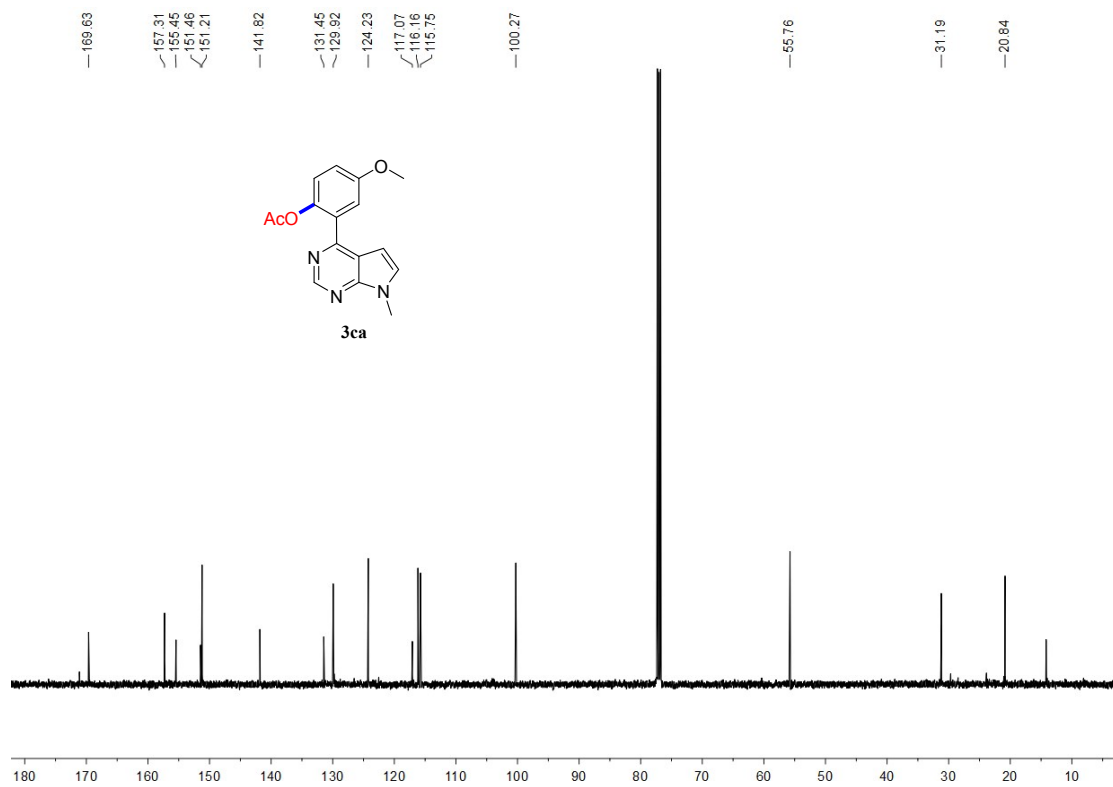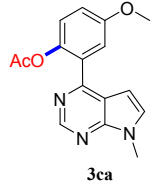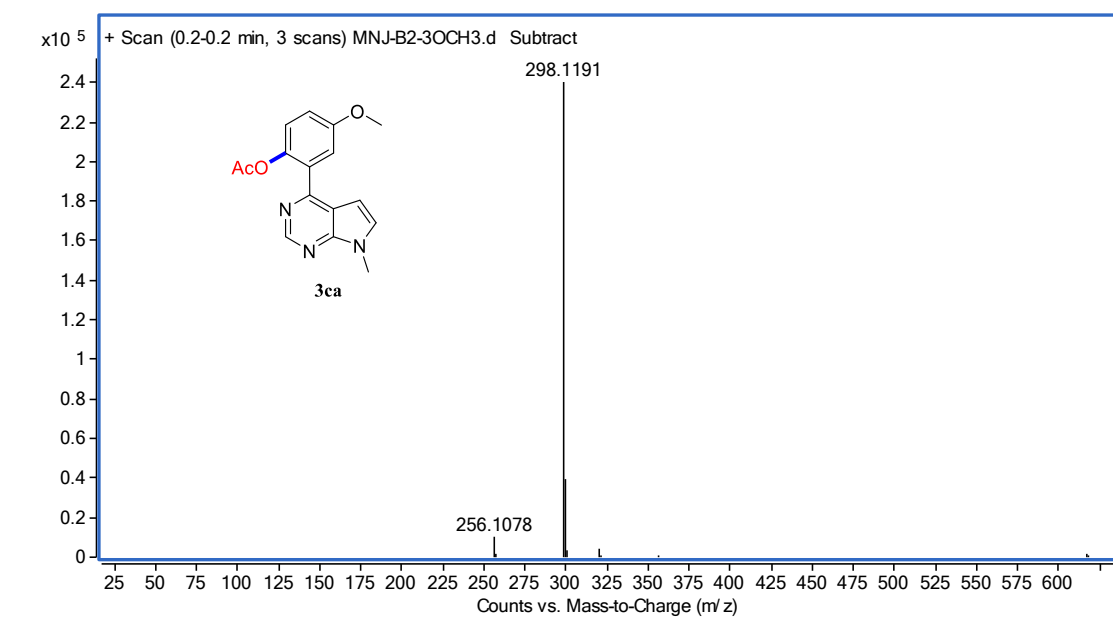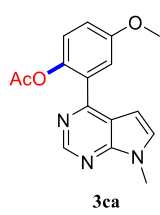

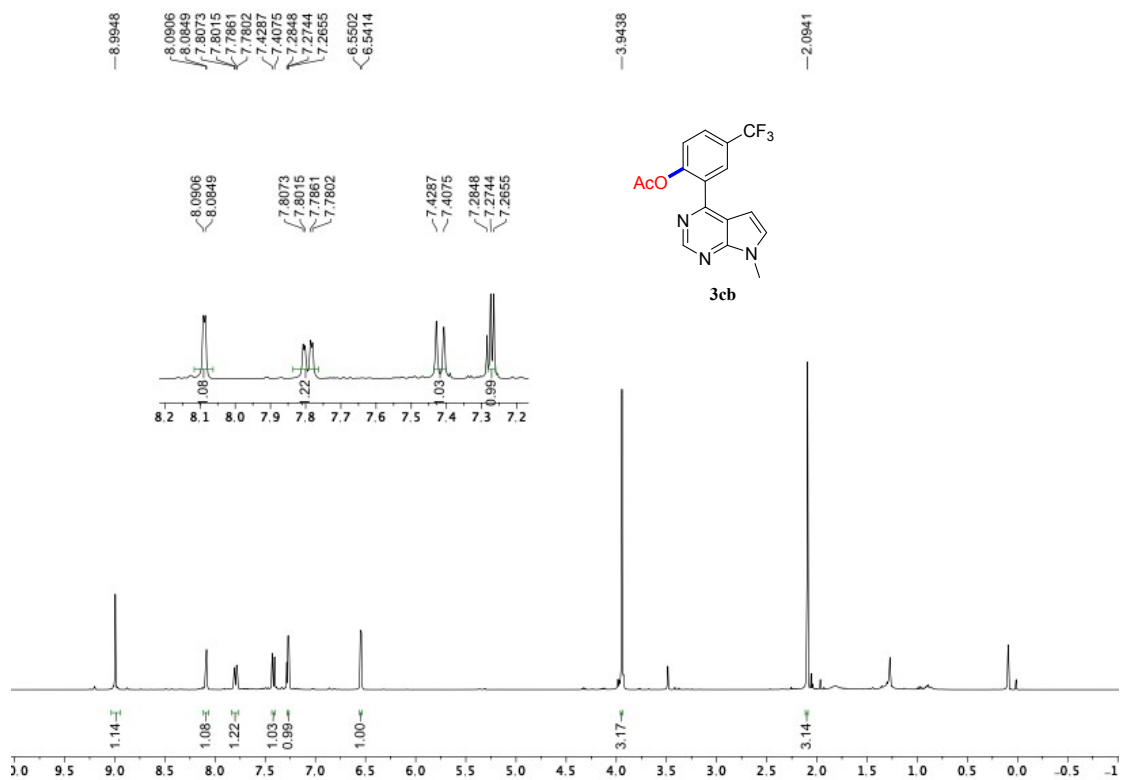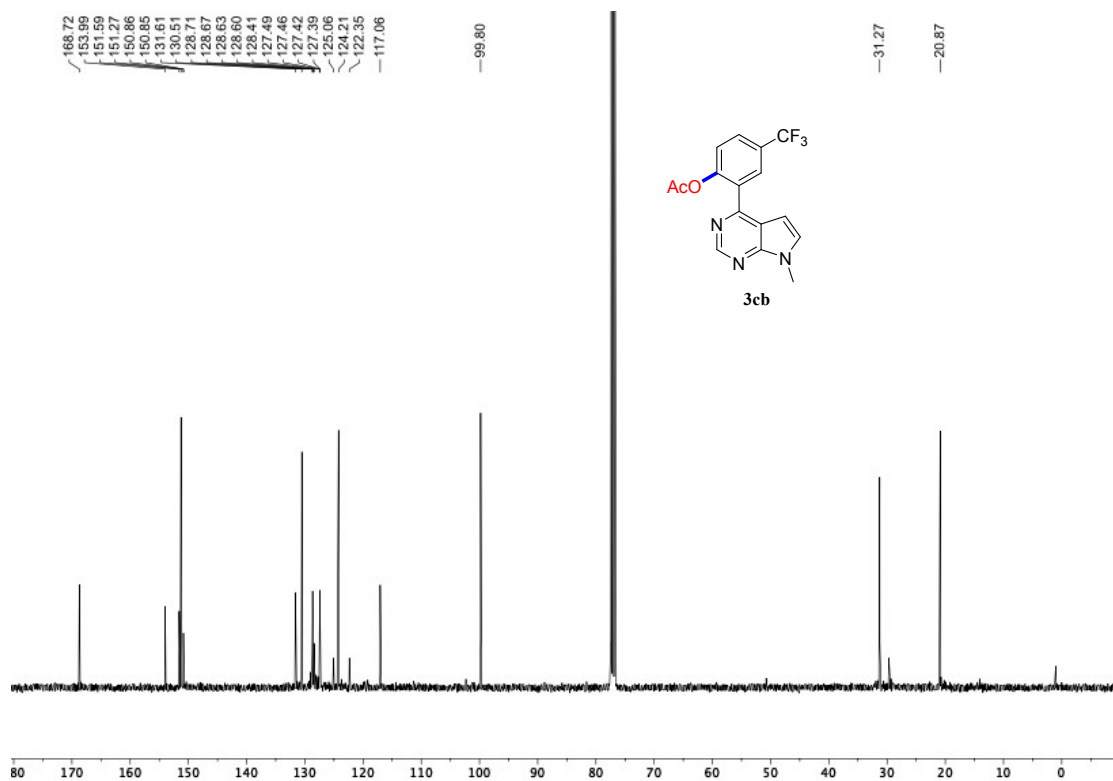

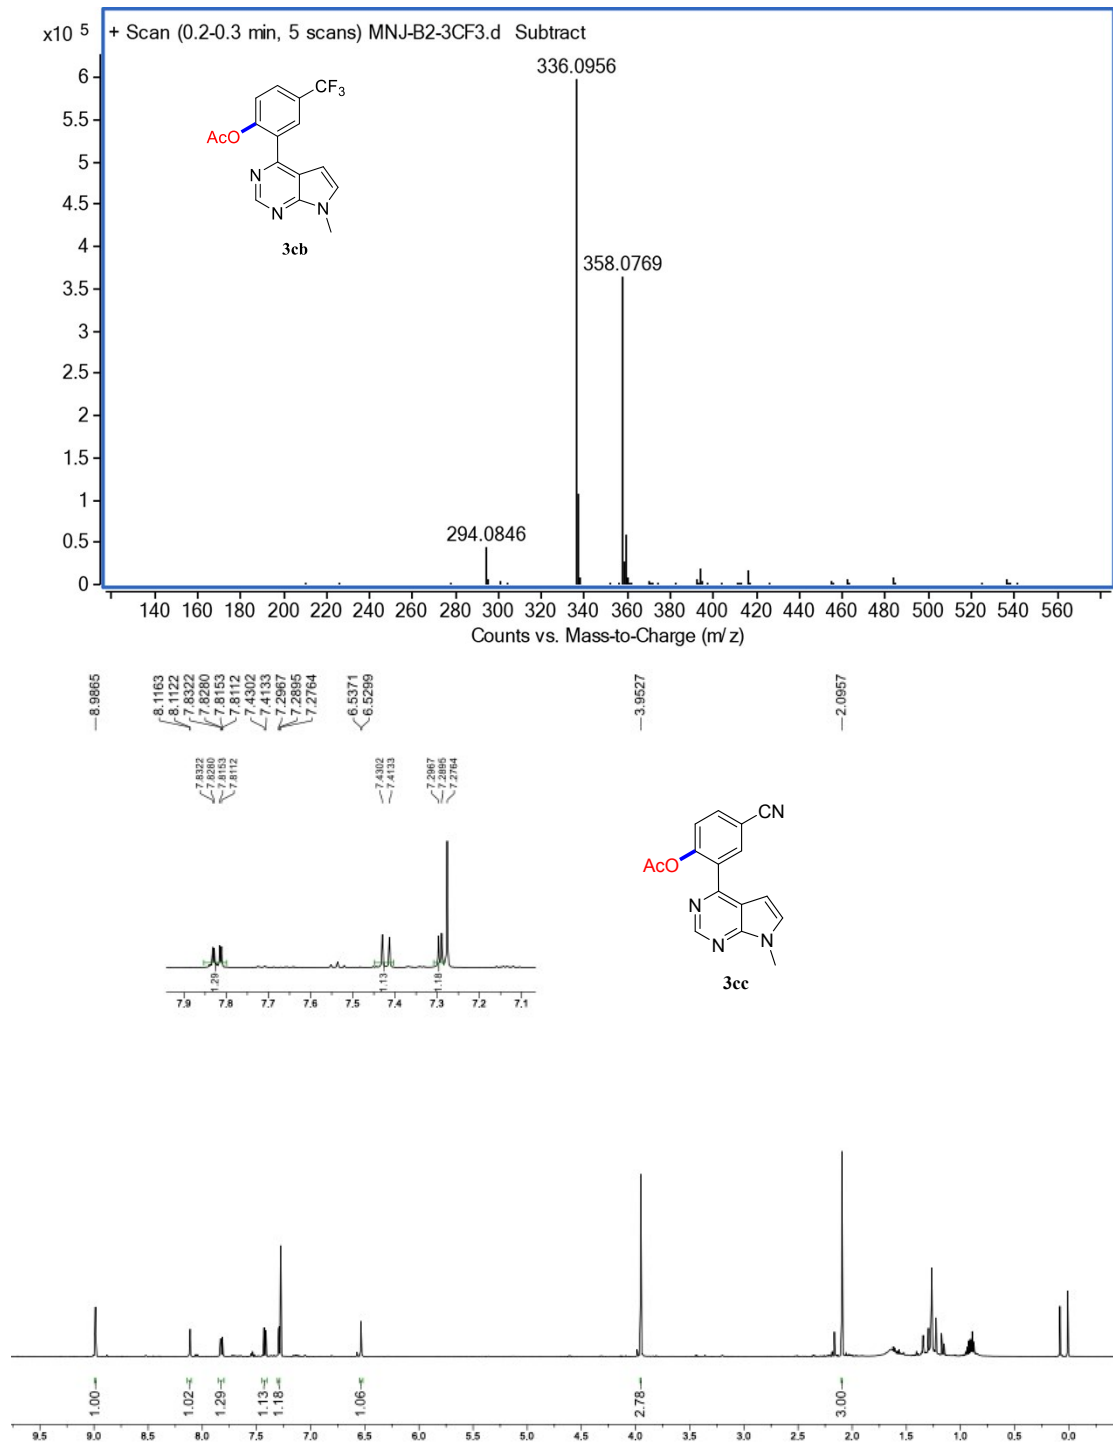

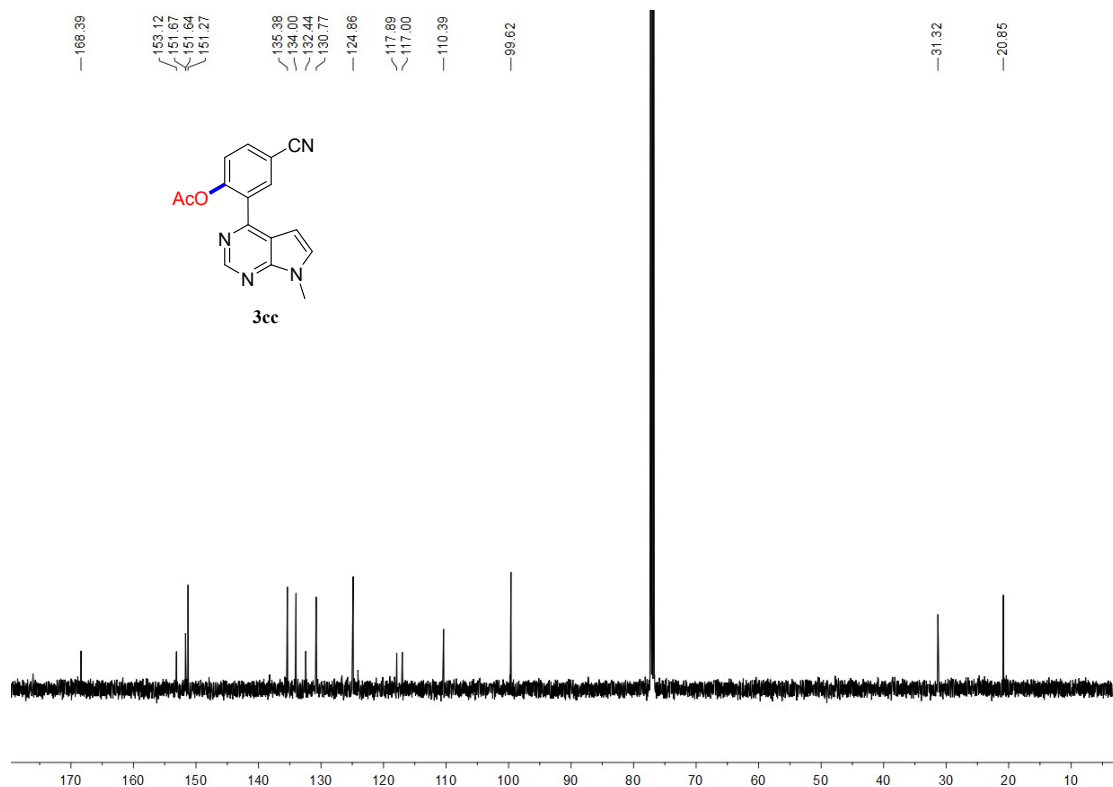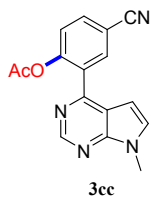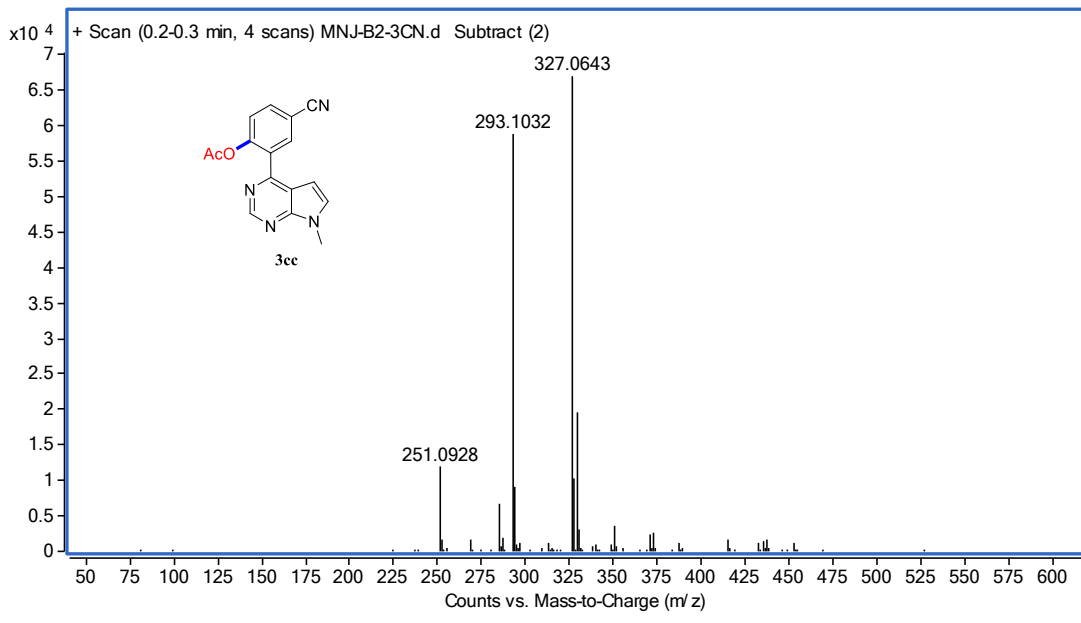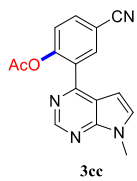

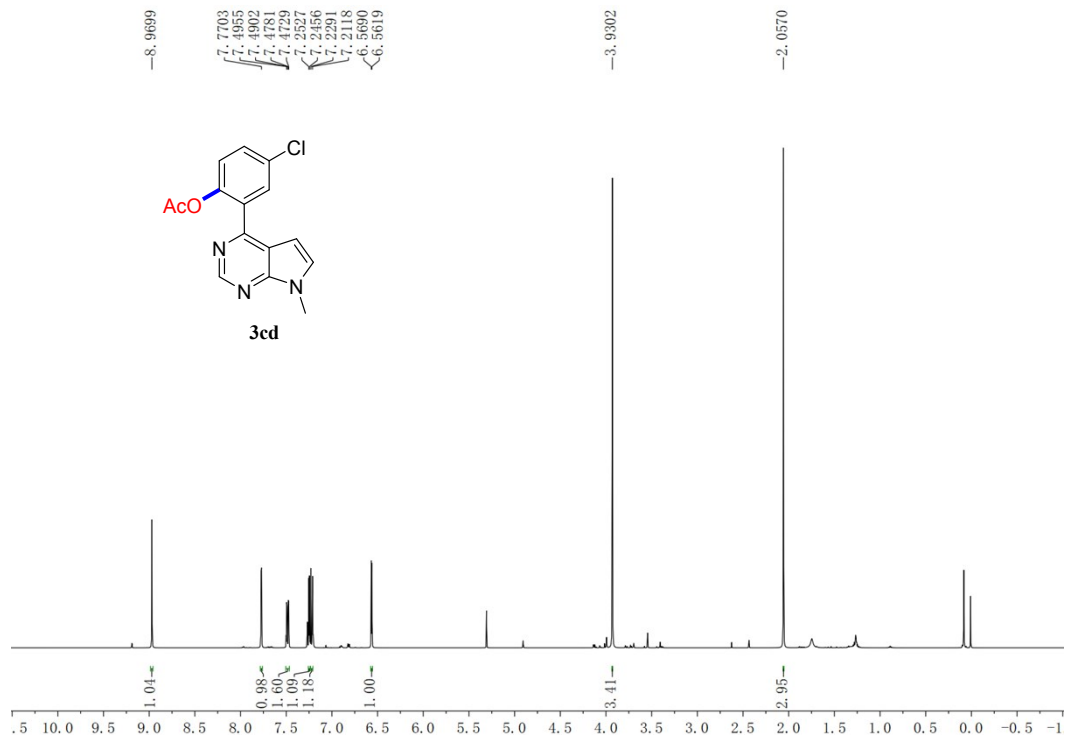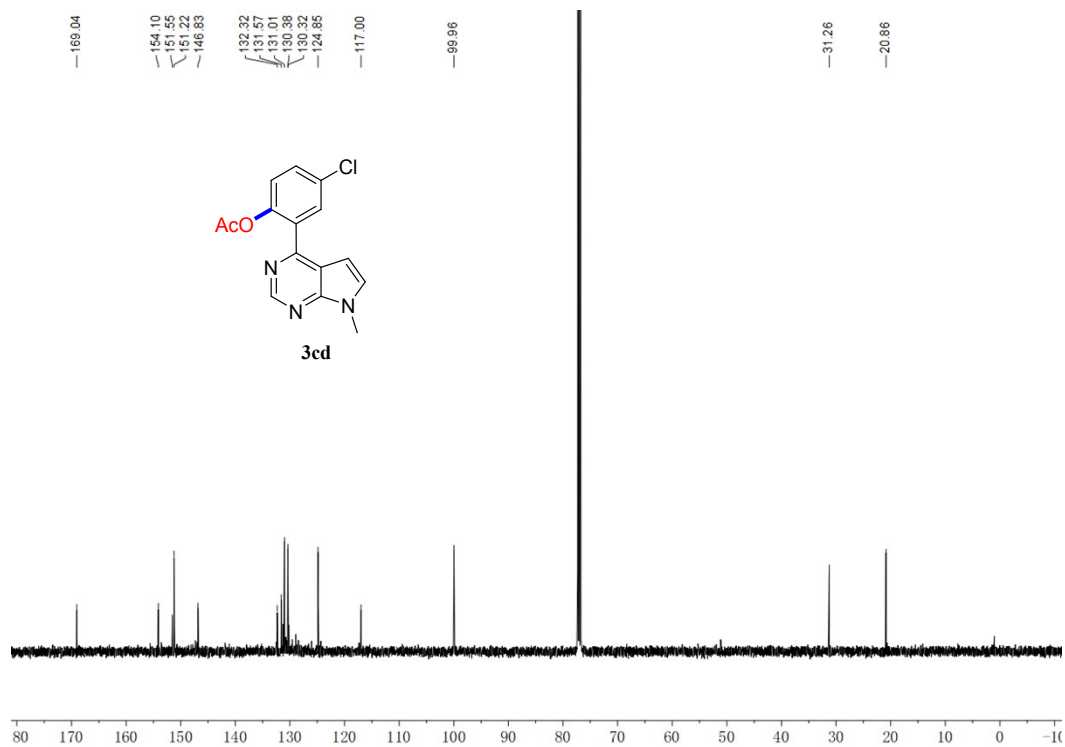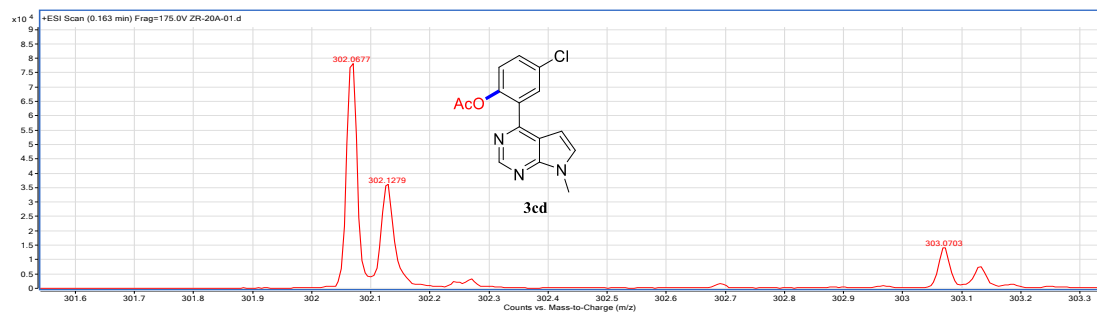

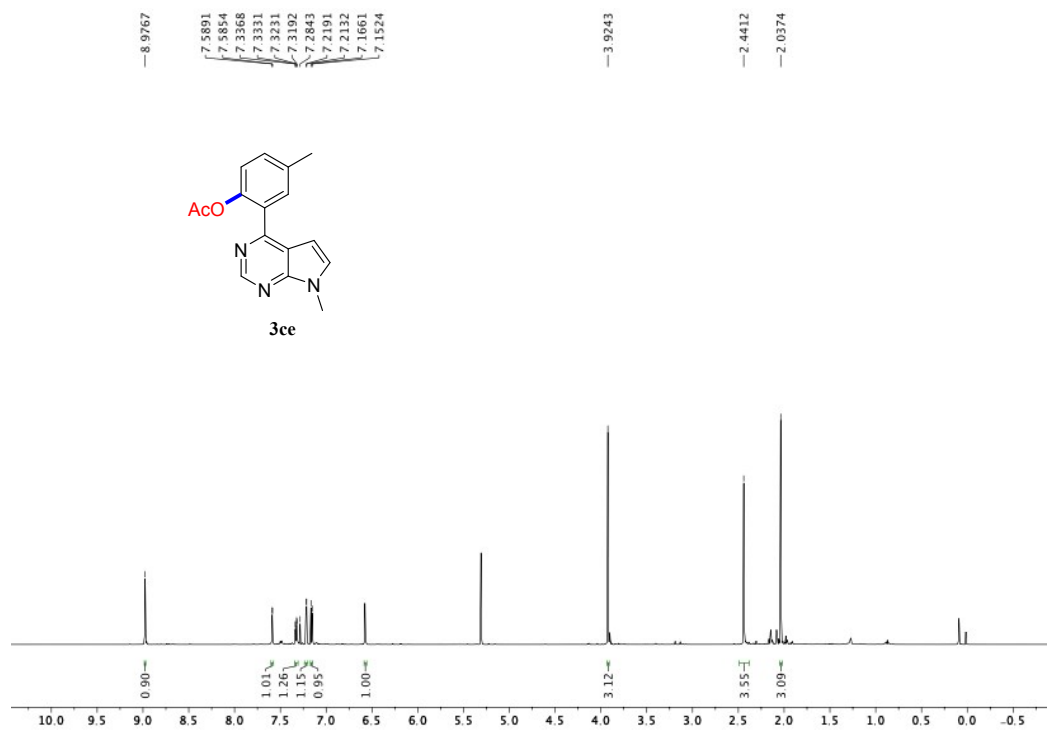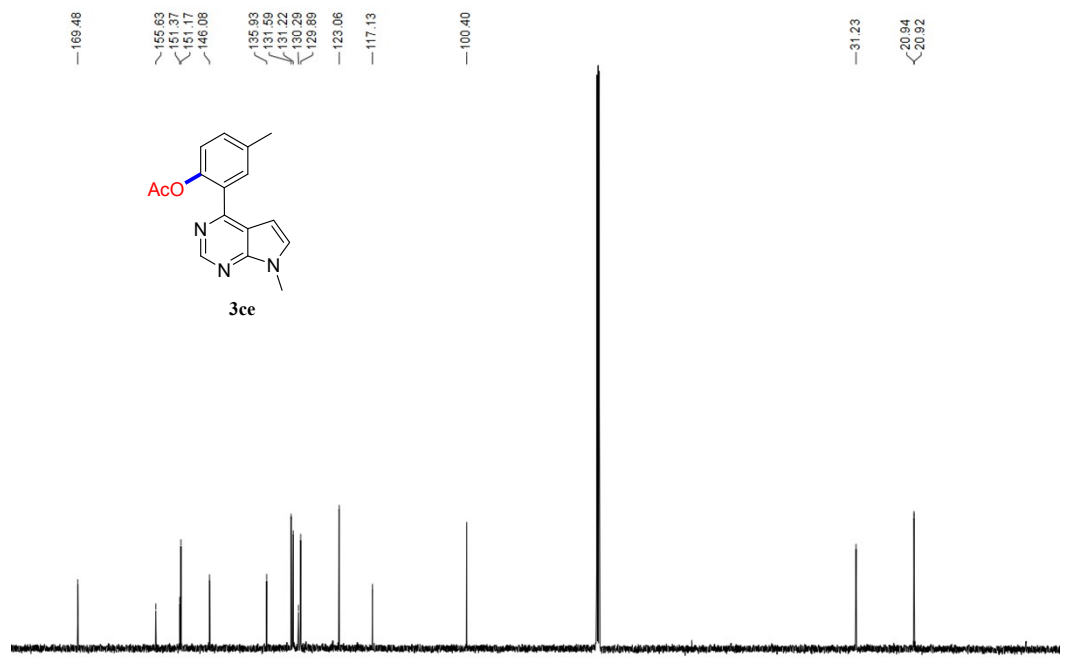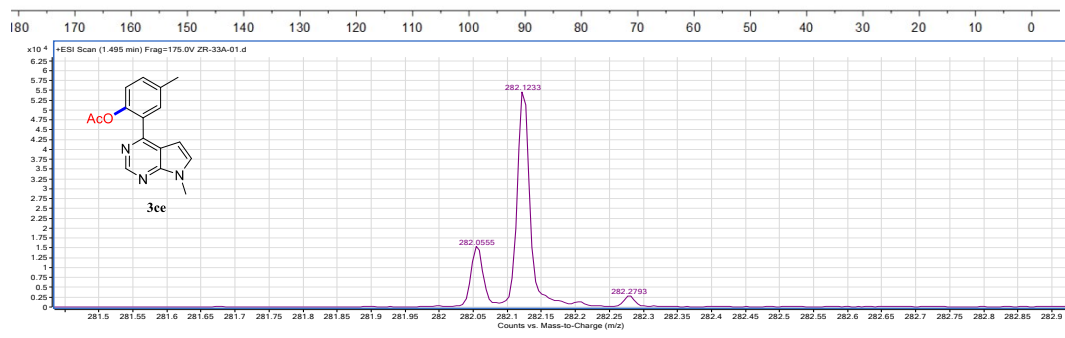

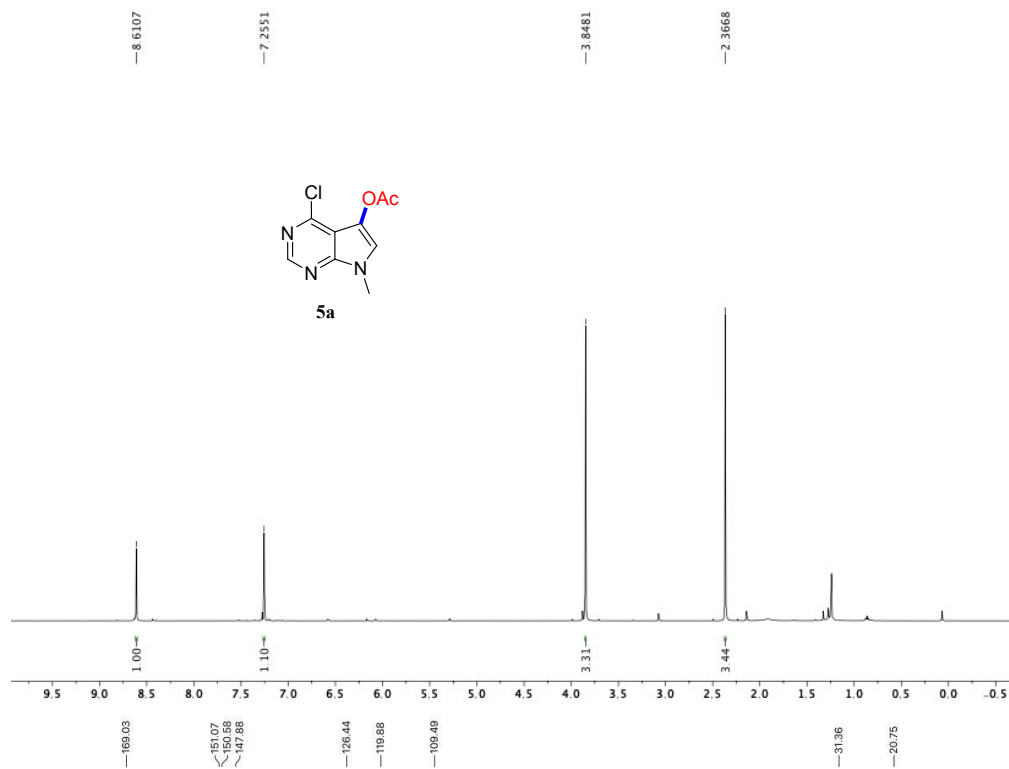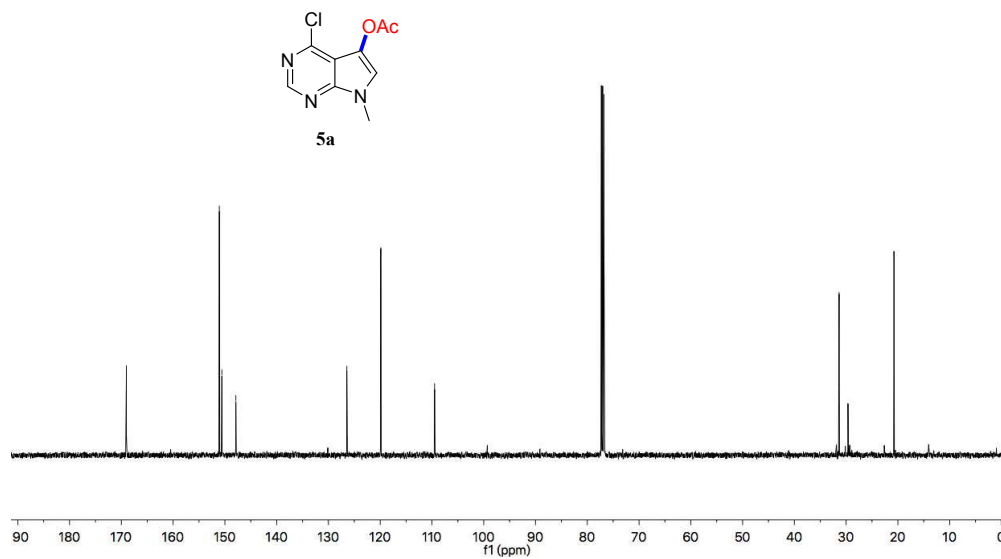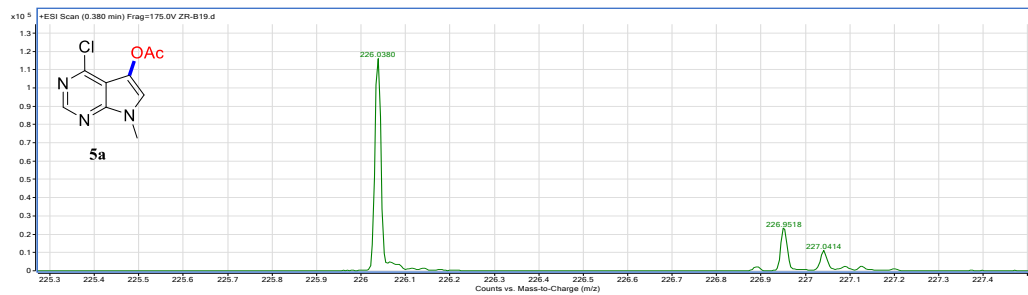



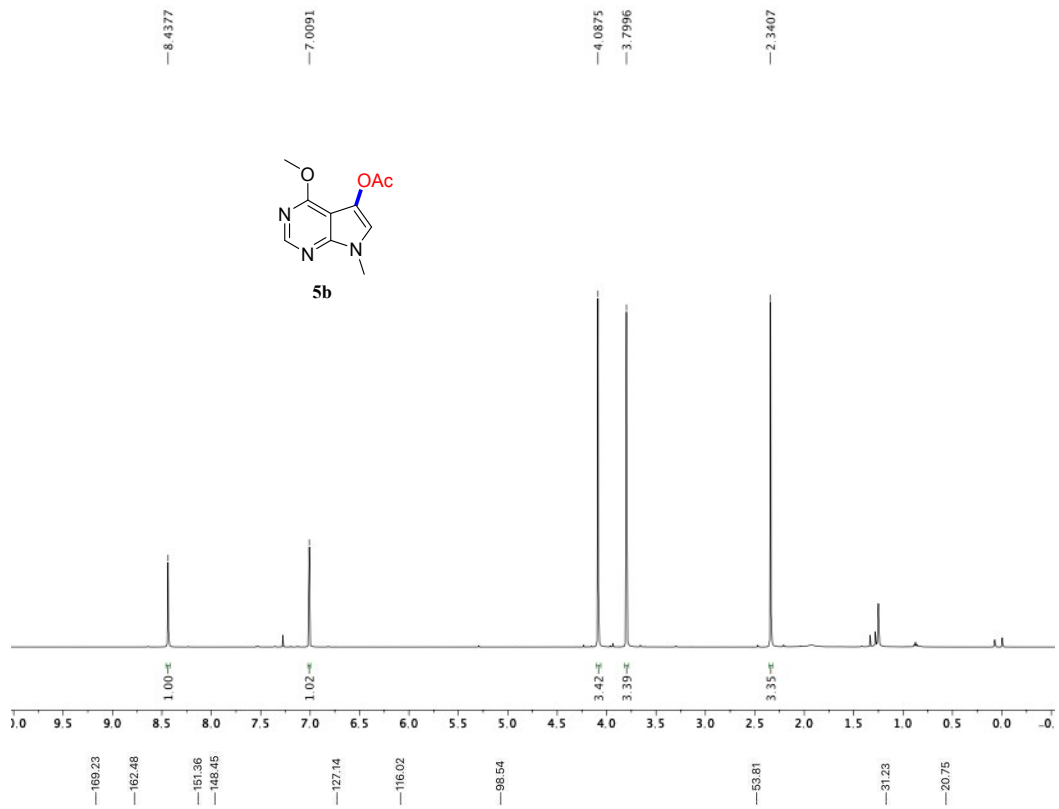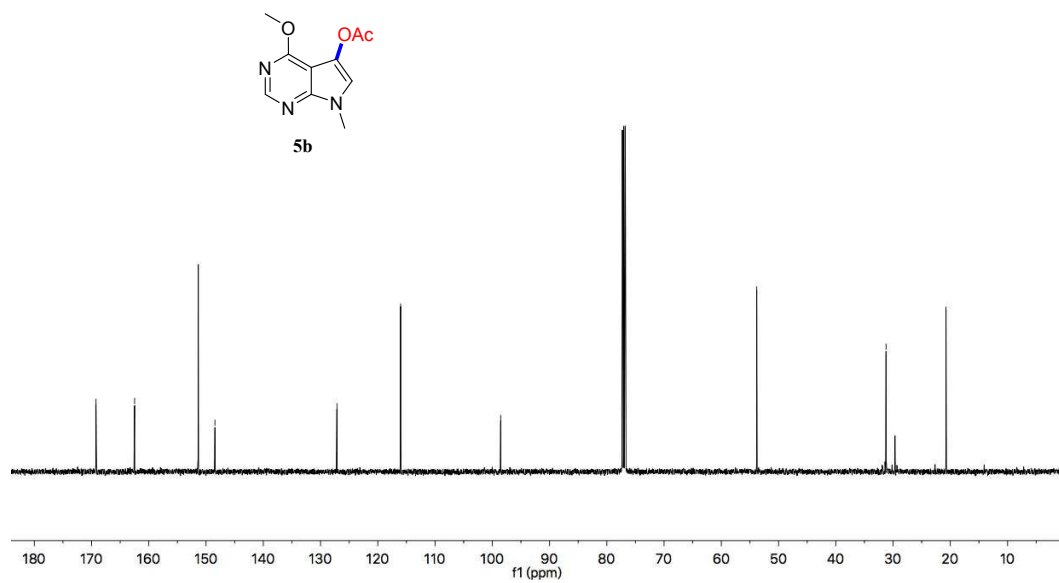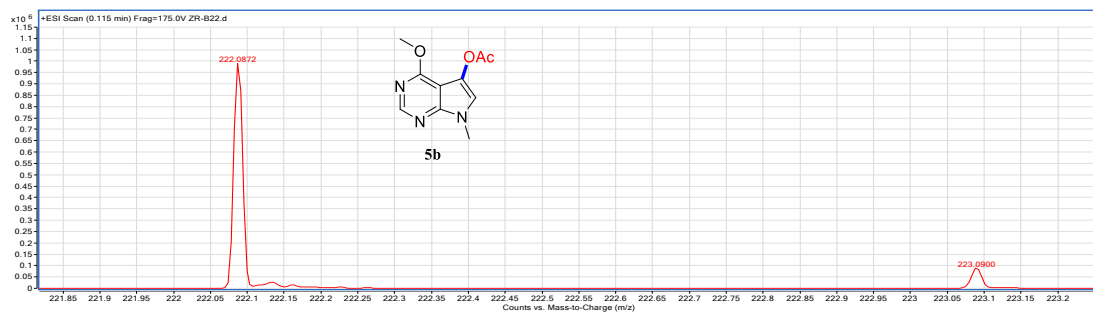

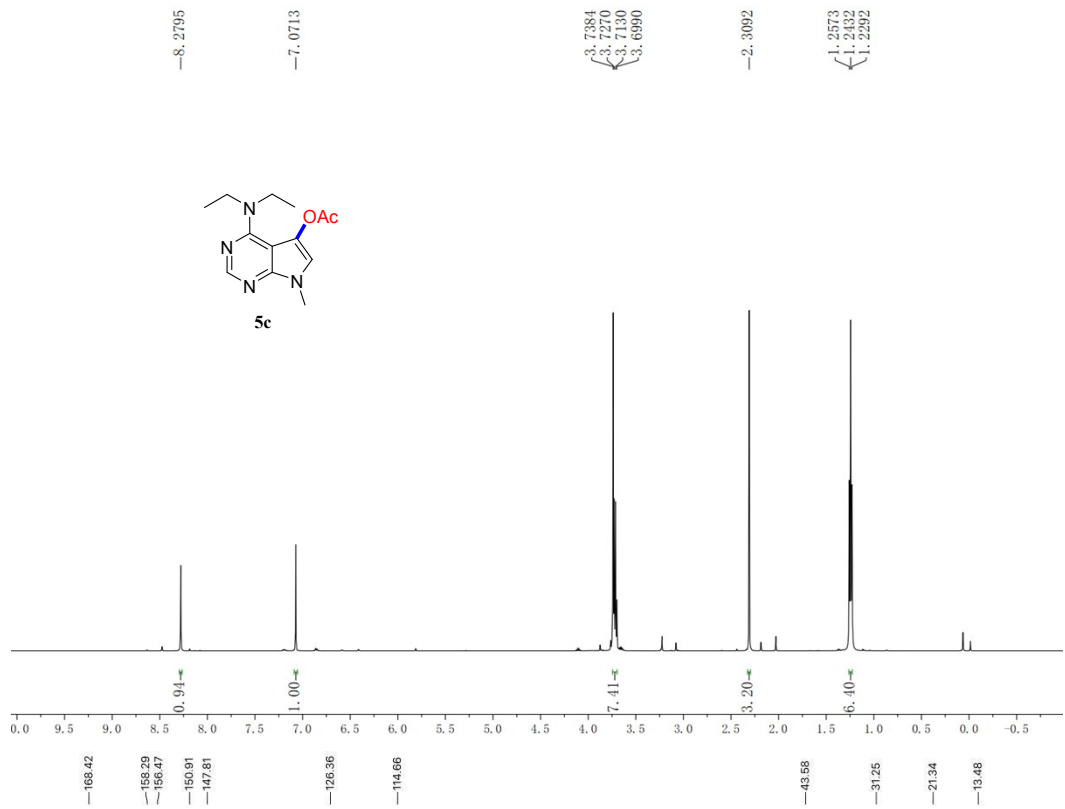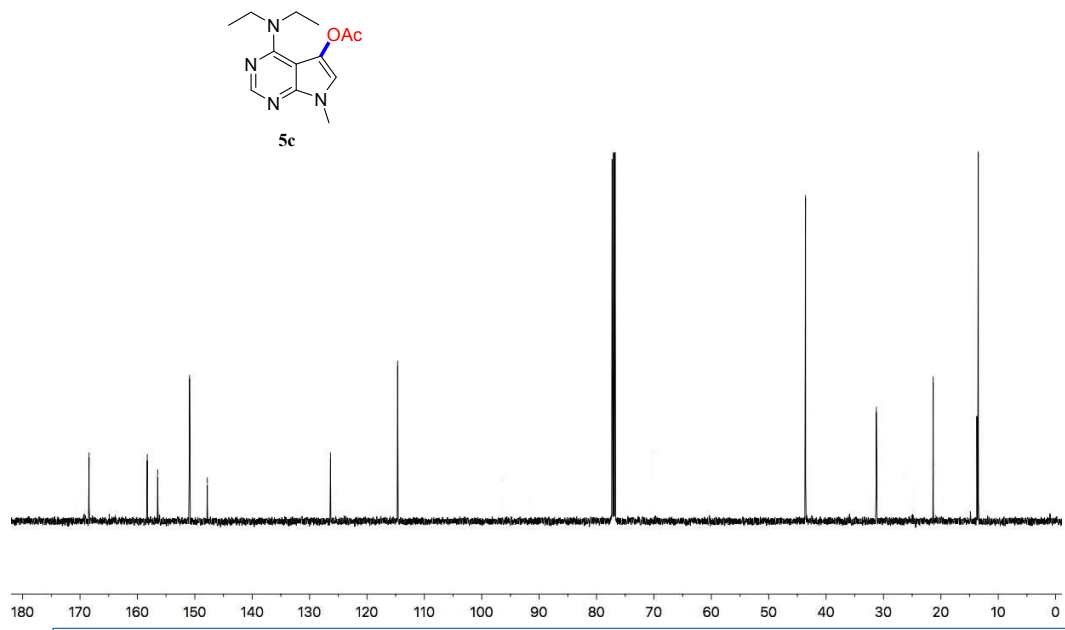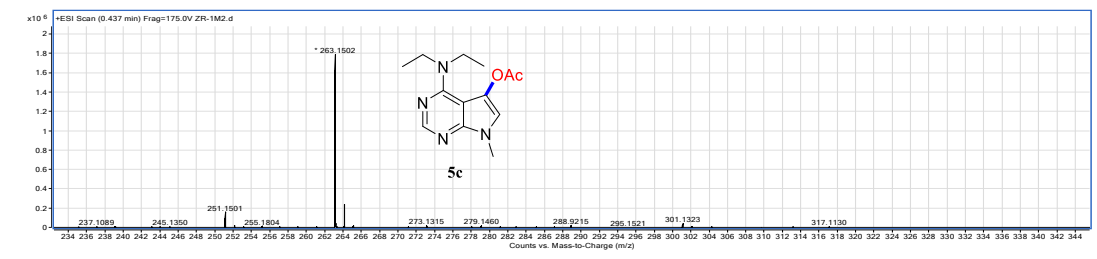

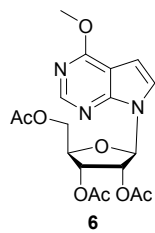

-8.5397  
 -7.5902  
 -7.2763  
 6.7772  
 6.7697  
 6.6906  
 6.6854  
 5.8358  
 5.8279  
 5.8175  
 5.5860  
 5.5744  
 5.5630  
 4.5924  
 4.5857  
 4.5795  
 4.5746  
 4.5725  
 4.5669  
 4.5111  
 4.5055  
 4.4968  
 4.4892  
 4.2115  
 -2.1999  
 -2.1188

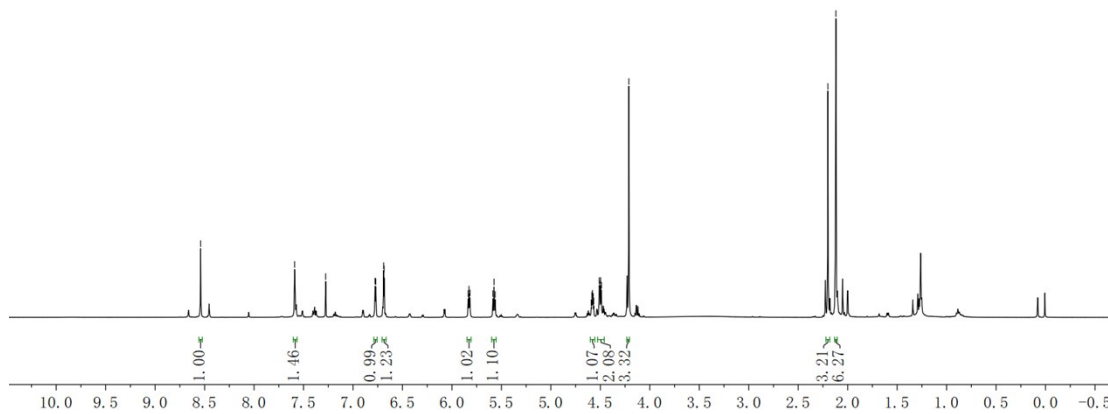

170.26  
 169.52  
 169.36  
 181.78  
 148.40  
 141.88  
 137.13  
 108.85  
 98.85  
 90.45  
 80.43  
 74.28  
 69.80  
 62.58  
 54.92  
 29.69  
 20.81  
 20.48

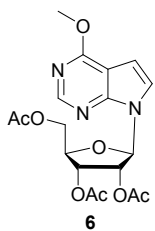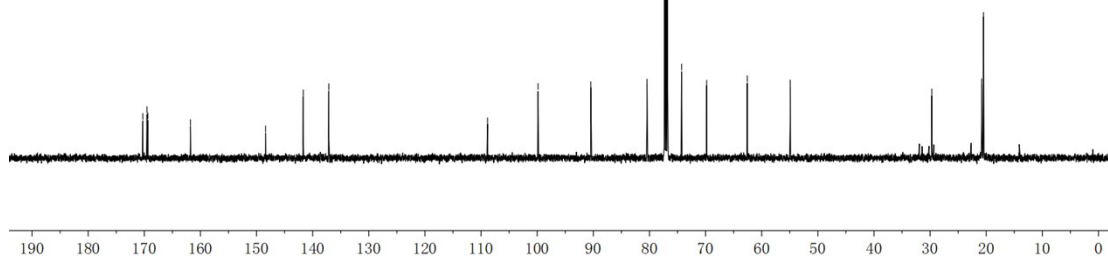

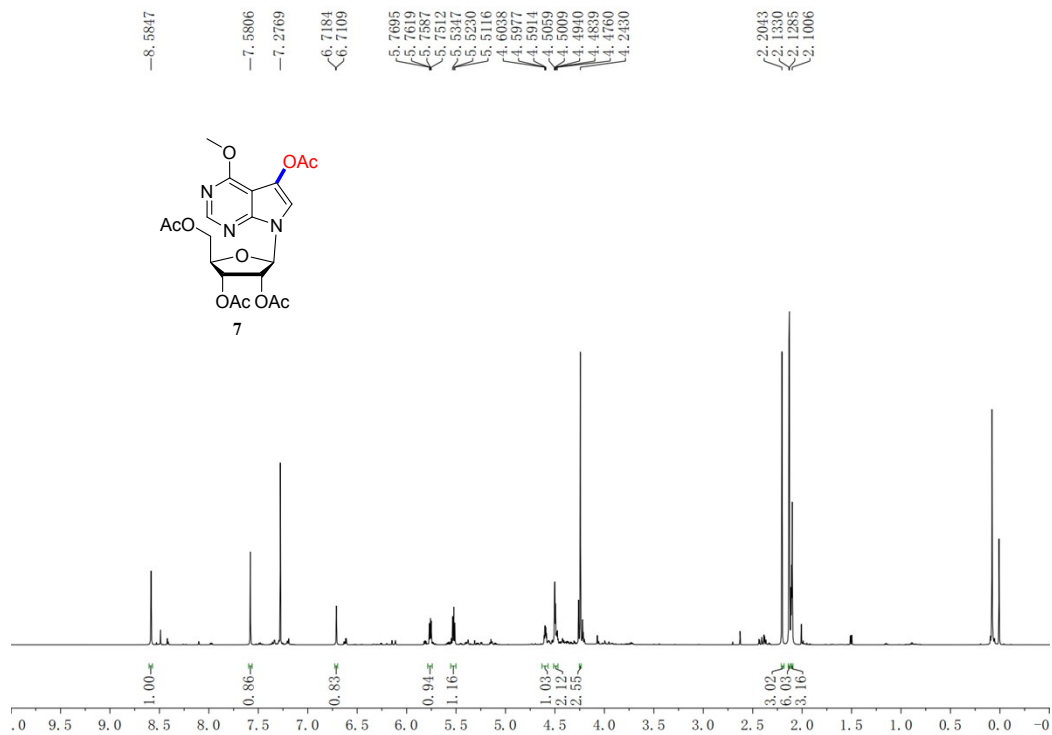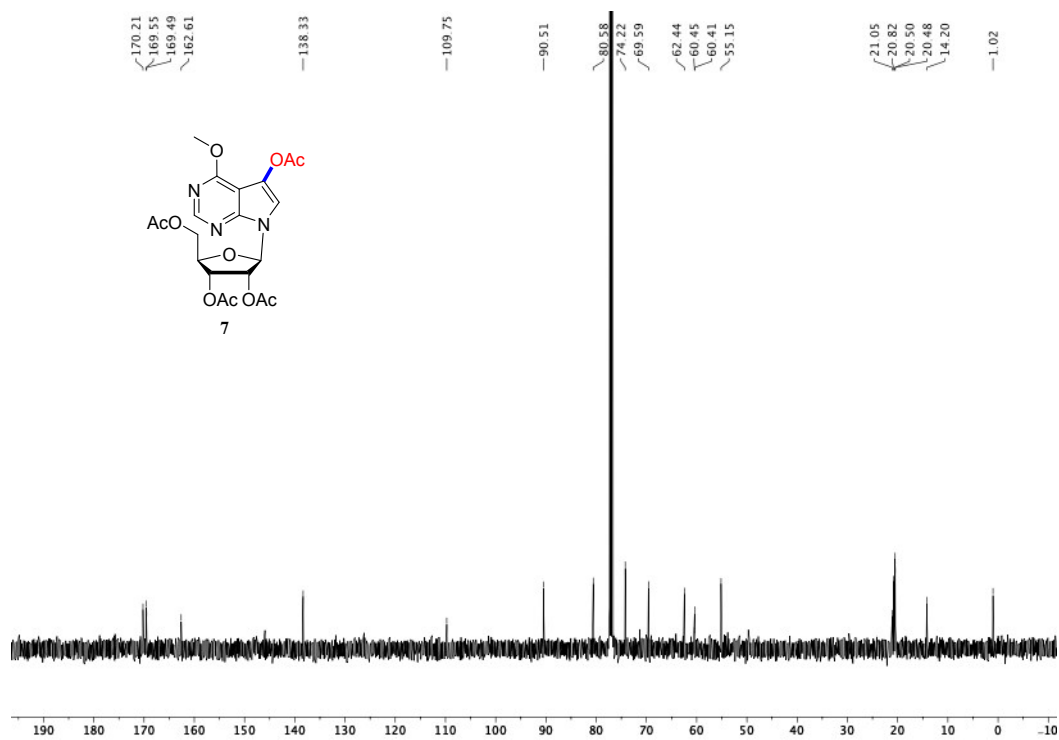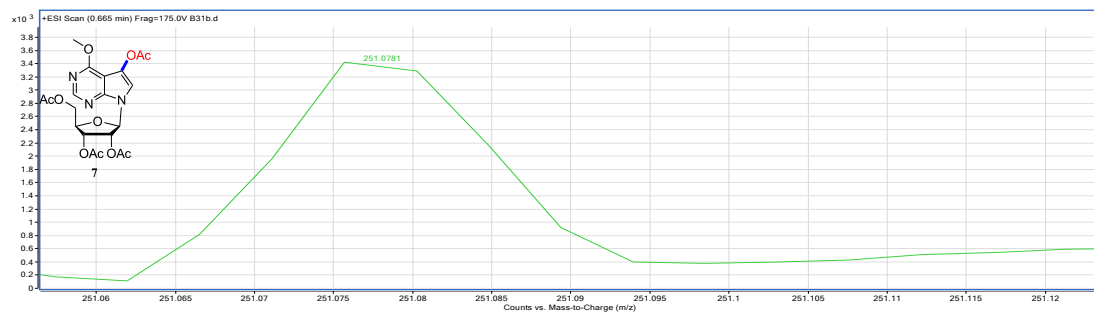

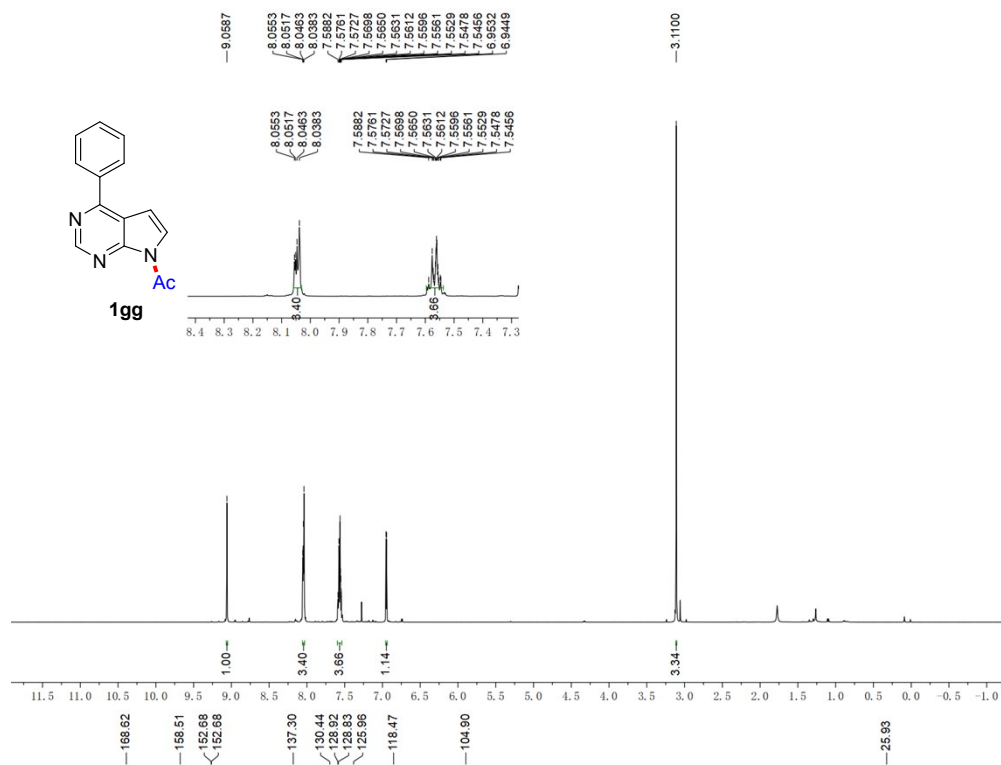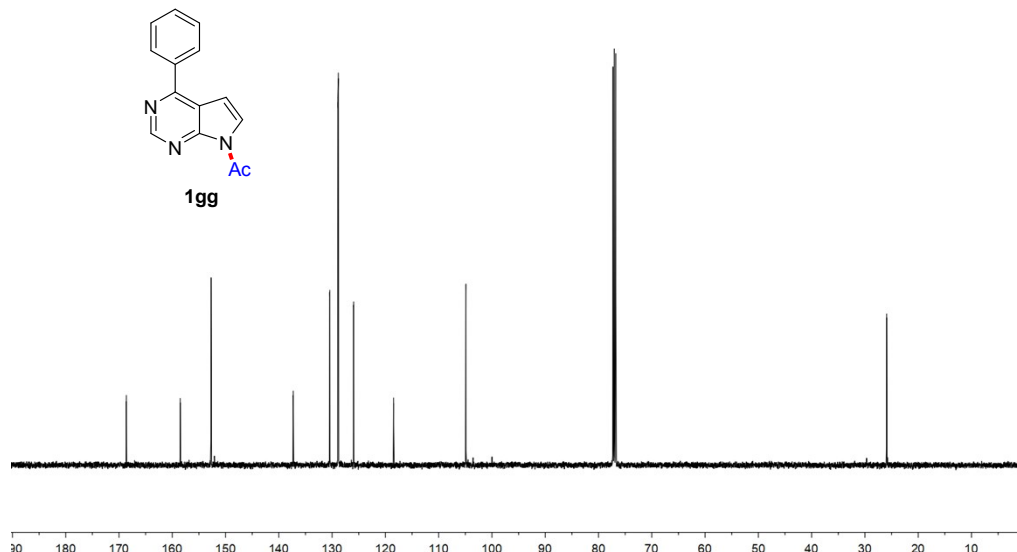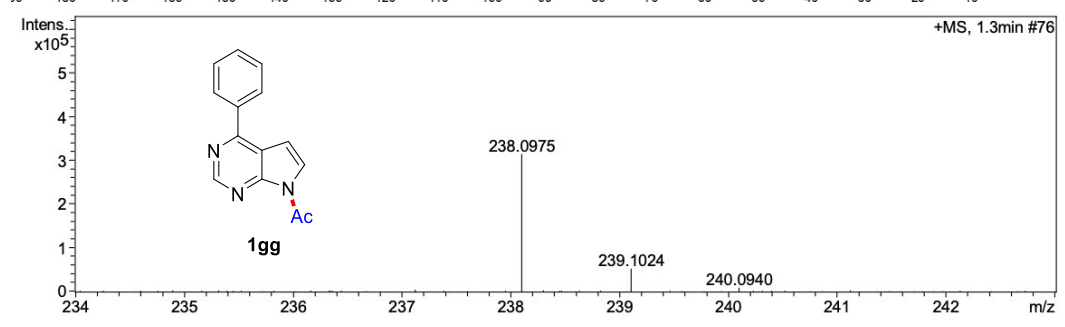

## 6. Single Crystal X-ray Diffraction Data for Compounds 2ba

Figure S1. X-ray crystal structure of 2ba

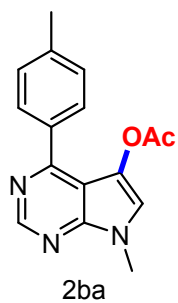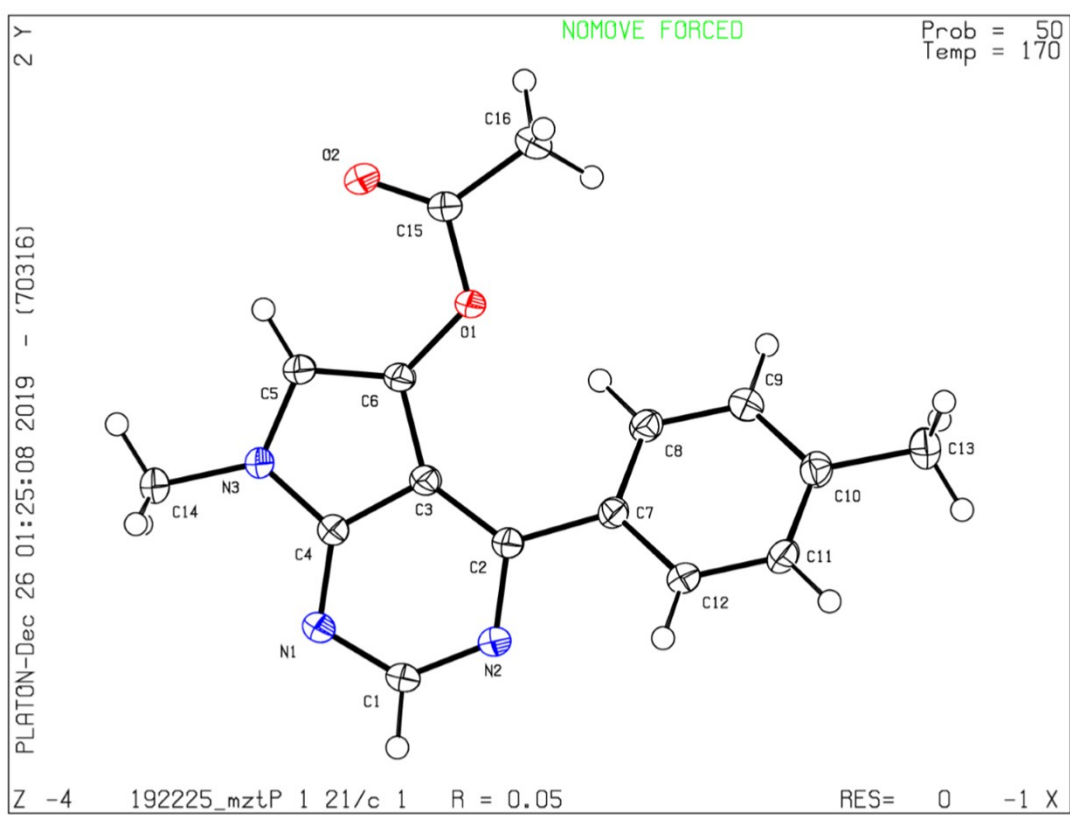

Table S2. Crystal data and structure refinement for 2ba.

**Datablock: 192225\_mzt\_21b\_0m\_tw**

---

Bond precision: C-C = 0.0022 Å                      Wavelength=0.71073

Cell:                      a=19.365(9)              b=10.189(4)              c=6.932(3)  
                                  alpha=90              beta=96.906(17)              gamma=90

Temperature:              170 K

|                | Calculated    | Reported      |
|----------------|---------------|---------------|
| Volume         | 1357.8(10)    | 1357.8(9)     |
| Space group    | P 21/c        | P 1 21/c 1    |
| Hall group     | -P 2ybc       | -P 2ybc       |
| Moiety formula | C16 H15 N3 O2 | C16 H15 N3 O2 |
| Sum formula    | C16 H15 N3 O2 | C16 H15 N3 O2 |
| Mr             | 281.31        | 281.31        |
| Dx, g cm-3     | 1.376         | 1.376         |
| Z              | 4             | 4             |
| Mu (mm-1)      | 0.093         | 0.093         |
| F000           | 592.0         | 592.0         |
| F000'          | 592.25        |               |
| h, k, lmax     | 24, 13, 8     | 24, 13, 8     |
| Nref           | 2999          | 2970          |
| Tmin, Tmax     | 0.975, 0.982  | 0.671, 0.746  |
| Tmin'          | 0.955         |               |

Correction method= # Reported T Limits: Tmin=0.671 Tmax=0.746  
 AbsCorr = MULTI-SCAN

Data completeness= 0.990                      Theta(max)= 27.135

R(reflections)= 0.0516( 2566)                      wR2(reflections)= 0.1361( 2970)

S = 1.060                      Npar= 194

---

## 7. HRMS of $\text{PhI}(\text{OCOEt})_2$

### Mass Spectrum SmartFormula Report

#### Analysis Info

Analysis Name D:\Data\2020\0725\2\_1-D,1\_01\_13693.d  
 Method lc\_pos\_3min\_hn.m  
 Sample Name 2  
 Comment

Acquisition Date 7/25/2020 6:17:30 PM

Operator BDAL@DE  
 Instrument / Ser# micrOTOF-Q II 10366

#### Acquisition Parameter

|             |            |                       |           |                  |           |
|-------------|------------|-----------------------|-----------|------------------|-----------|
| Source Type | ESI        | Ion Polarity          | Positive  | Set Nebulizer    | 0.8 Bar   |
| Focus       | Not active | Set Capillary         | 5500 V    | Set Dry Heater   | 200 °C    |
| Scan Begin  | 50 m/z     | Set End Plate Offset  | -500 V    | Set Dry Gas      | 6.0 l/min |
| Scan End    | 950 m/z    | Set Collision Cell RF | 150.0 Vpp | Set Divert Valve | Waste     |

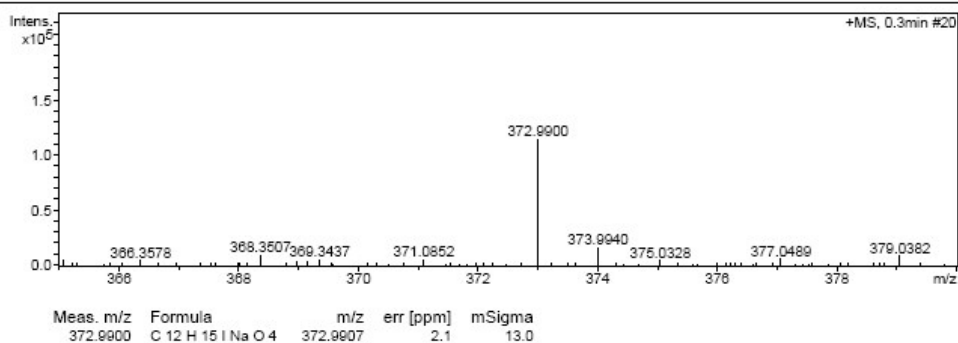

Supplement: d0qo00702a1.pdf [file d0qo00702a1.pdf]
